# Supplementary material for: Depression: point-prevalence and risk factors in a North Cyprus household adult cross-sectional study
Source: BMC Psychiatry. 2017 Dec 4;17:387. doi: 10.1186/s12888-017-1548-z (PMC5716299; doi:10.1186/s12888-017-1548-z)
Supplement: Additional file 1: — Weight total - depression-prevalence dataset. (XLSX 258 kb) [file 12888_2017_1548_MOESM1_ESM.xlsx]

## Sheet: weighttotal---depression-preval
b1.1	b1.2	b1.3	yasananyıl	b1.4	b1.5	cocuksayı	b1.6	b1.6.1	b1.7	b1.8	b1.9	b1.10	b1.11	b1.12	b1.13	b1.14	b1.15	b1.16	b1.17	b1.18	b1.19	b1.20	b1.21	b4.1	b4.2	b4.3	b4.4	b4.5	b4.6	b4.7	b4.8	b4.9	b4.10	b4.11	b4.12	b4.13	b4.14	b4.15	b4.16	b4.17	b4.18	b4.19	b4.20	b4.21	yas1	cocuktoplam	yıltoplam	deptop	yasgrup
2	22	2	1	9	4	#NULL!	1	#NULL!	3	1	8	5	2	3	1	2	2	2	4	4	7	1	2	1	0	0	1	1	0	1	0	0	0	1	1	1	0	0	1	1	0	0	2	0	1	#NULL!	1	1	1
1	21	2	1	4	5	#NULL!	1	#NULL!	3	1	1	5	2	3	1	2	2	2	4	6	7	7	2	1	1	1	1	1	1	1	1	1	1	1	1	1	1	1	1	1	1	1	1	1	1	#NULL!	1	#NULL!	1
1	34	2	1	8	5	2	2	1	2	1	1	3	2	3	1	2	2	2	5	5	3	1	2	1	1	1	1	1	1	1	1	1	1	1	1	1	1	1	1	1	1	1	1	1	2	2	1	#NULL!	2
1	46	2	3	24	1	3	2	2	3	1	5	3	2	3	2	2	2	2	2	1	7	7	2	0	0	0	0	0	0	0	0	0	0	0	0	0	0	0	0	0	0	0	0	0	3	3	3	1	2
1	27	1	3	27	4	#NULL!	1	#NULL!	3	1	7	6	3	4	1	2	2	2	3	1	7	7	2	1	0	0	1	0	3	1	1	0	2	1	1	1	0	0	1	0	0	3	0	0	1	#NULL!	3	1	1
1	29	1	3	29	4	#NULL!	1	#NULL!	3	1	1	6	4	4	1	2	2	2	3	6	7	7	1	0	0	0	0	1	1	0	1	0	0	0	0	0	0	0	0	0	0	0	0	0	1	#NULL!	3	1	1
1	55	1	6	55	1	3	2	2	1	1	4	6	4	1	1	2	2	2	2	6	6	1	2	0	0	0	0	0	0	0	0	0	0	0	0	0	0	0	0	1	1	0	2	3	4	3	6	1	3
1	21	2	2	10	4	#NULL!	2	#NULL!	3	1	1	5	2	3	1	2	2	2	4	6	7	7	2	1	0	1	1	0	1	0	1	0	0	1	0	1	1	1	1	1	0	0	1	0	1	#NULL!	2	1	1
1	19	1	2	19	4	#NULL!	1	#NULL!	3	2	2	6	1	4	1	2	2	2	3	1	6	1	2	1	0	0	0	0	0	0	0	0	0	0	0	0	0	0	0	0	0	0	0	0	1	#NULL!	2	1	1
1	72	2	5	40	1	6	2	5	1	2	6	1	1	1	2	1	2	2	2	3	1	1	2	0	0	0	0	0	0	0	0	0	0	0	0	0	0	0	0	0	0	0	0	0	5	6	5	1	3
1	40	1	5	40	1	5	2	4	3	1	4	6	4	1	1	2	2	2	2	3	7	7	2	1	1	0	1	0	1	0	0	0	0	0	1	1	0	0	1	0	1	0	0	0	3	5	5	1	2
1	28	4	1	4	1	#NULL!	1	#NULL!	3	1	1	5	3	4	2	2	2	2	2	5	5	1	2	0	0	0	0	0	0	0	0	0	0	0	0	0	0	0	0	0	0	0	0	1	1	#NULL!	1	1	1
1	31	2	1	4	1	6	2	5	3	1	8	5	3	3	1	2	2	2	2	3	7	7	2	1	0	0	1	0	0	0	0	0	0	0	1	1	1	0	1	1	1	2	1	1	2	6	1	1	2
1	30	1	4	30	1	2	2	1	1	1	8	6	4	1	1	2	2	2	2	3	5	1	2	0	0	0	0	0	0	0	0	0	0	0	0	0	0	0	0	0	0	0	0	0	2	2	4	1	2
1	33	2	1	1	1	7	2	6	2	1	4	6	3	3	1	2	2	2	2	3	1	1	2	0	1	0	0	0	0	0	0	0	0	0	0	0	0	0	0	0	0	0	0	0	2	7	1	1	2
1	64	2	#NULL!	#NULL!	1	4	2	3	1	2	6	3	3	2	2	2	2	2	2	3	1	1	2	1	1	1	1	2	1	1	3	0	1	1	1	2	1	1	1	1	1	1	0	1	5	4	#NULL!	2	3
1	23	1	3	23	4	#NULL!	1	#NULL!	1	2	2	6	3	1	1	2	2	2	3	3	5	1	2	0	0	0	0	0	0	0	0	0	0	0	0	0	0	0	0	0	0	0	0	0	1	#NULL!	3	1	1
1	60	1	5	42	1	4	2	3	1	2	3	3	1	2	2	1	2	2	2	3	2	4	2	1	1	0	0	1	0	0	0	0	0	0	0	1	1	2	1	1	1	1	1	3	5	4	5	1	3
1	70	1	7	70	1	6	2	5	1	2	8	3	2	1	3	1	2	2	2	1	7	1	2	0	0	0	0	0	0	0	0	0	0	0	0	0	0	0	0	0	0	0	0	0	5	6	7	1	3
1	46	1	#NULL!	#NULL!	6	4	2	3	1	2	6	4	2	4	3	2	2	2	1	4	1	1	2	0	3	0	0	0	0	0	0	0	0	0	0	0	1	1	1	1	1	1	0	0	3	4	#NULL!	1	2
1	35	1	#NULL!	#NULL!	1	3	2	2	1	1	5	4	3	4	1	2	2	2	2	3	7	7	2	0	0	0	0	0	0	0	0	0	0	0	0	1	1	1	1	1	0	1	1	1	2	3	#NULL!	1	2
2	55	2	3	25	1	5	2	4	1	2	3	3	1	2	2	2	2	2	2	3	5	6	2	0	0	0	0	0	0	0	0	0	0	0	0	0	0	0	0	0	0	0	0	0	4	5	3	1	3
1	25	1	1	1	1	2	2	1	2	1	5	6	4	1	3	2	2	2	2	1	7	7	2	0	0	0	0	0	0	0	0	0	0	0	0	0	0	0	0	0	0	0	0	0	1	2	1	1	1
2	68	1	7	68	1	#NULL!	1	#NULL!	3	1	5	6	4	1	1	2	2	2	2	1	7	7	2	1	0	0	0	0	0	0	0	0	0	0	0	0	0	0	0	0	0	2	1	0	5	#NULL!	7	1	3
1	50	1	6	50	5	3	2	2	3	1	7	5	3	3	1	2	2	2	2	4	7	7	2	1	3	0	0	0	3	0	1	0	0	0	0	1	0	0	0	0	0	0	0	0	4	3	6	1	3
2	23	1	#NULL!	#NULL!	3	#NULL!	1	#NULL!	3	1	2	6	2	4	1	2	2	1	6	1	7	7	1	1	0	0	1	0	1	0	0	0	0	0	0	0	0	0	0	1	0	2	0	0	1	#NULL!	#NULL!	1	1
2	27	1	#NULL!	#NULL!	2	#NULL!	1	#NULL!	2	1	5	6	4	1	1	2	2	2	3	2	7	7	2	0	1	0	2	0	0	0	0	0	3	3	0	0	0	0	0	0	0	0	0	0	1	#NULL!	#NULL!	1	1
2	18	2	1	1	4	#NULL!	1	#NULL!	1	1	7	3	2	1	1	2	2	2	3	5	7	7	1	0	1	0	0	0	0	0	0	0	1	1	1	1	1	1	1	1	1	1	1	0	1	#NULL!	1	1	1
2	29	1	#NULL!	#NULL!	4	#NULL!	1	#NULL!	1	1	8	6	2	4	1	2	2	2	3	1	7	7	2	0	0	0	0	0	0	0	1	0	0	3	0	0	0	0	0	0	0	0	0	0	1	#NULL!	#NULL!	1	1
2	#NULL!	1	#NULL!	#NULL!	1	#NULL!	1	#NULL!	3	1	4	6	4	1	1	1	2	2	2	1	7	7	2	1	0	0	0	1	1	1	0	0	1	1	0	1	1	1	0	1	1	0	2	0	#NULL!	#NULL!	#NULL!	1	#NULL!
2	34	1	#NULL!	#NULL!	4	#NULL!	1	#NULL!	3	1	7	6	3	3	3	2	2	2	1	1	7	7	1	0	0	0	1	1	0	0	1	0	0	0	0	0	0	0	0	1	0	0	0	0	2	#NULL!	#NULL!	1	2
2	26	2	1	7	4	#NULL!	1	#NULL!	3	1	1	5	2	3	1	2	2	2	2	3	7	7	2	0	2	0	0	1	0	2	0	0	1	0	1	0	0	1	0	0	0	0	0	0	1	#NULL!	1	1	1
2	60	1	#NULL!	#NULL!	1	3	2	2	1	1	8	6	4	1	1	2	2	2	2	6	7	7	2	0	0	0	0	1	0	0	0	0	0	0	0	0	0	2	0	1	0	0	2	2	5	3	#NULL!	1	3
2	23	1	#NULL!	#NULL!	4	#NULL!	1	#NULL!	3	2	2	6	3	4	1	2	2	2	3	6	7	1	2	1	0	1	1	1	0	2	2	0	3	1	2	3	0	1	0	1	0	1	0	0	1	#NULL!	#NULL!	2	1
1	47	1	#NULL!	#NULL!	1	2	2	1	3	1	5	5	5	1	1	2	2	2	2	2	3	3	2	0	0	0	0	0	0	0	0	0	0	0	0	0	0	0	0	0	0	0	0	0	3	2	#NULL!	1	2
2	35	2	4	30	4	#NULL!	1	#NULL!	3	1	7	3	2	1	1	2	#NULL!	2	1	3	7	7	2	0	0	0	0	0	0	0	0	0	0	0	0	0	0	0	0	0	0	0	0	0	2	#NULL!	4	1	2
2	76	2	5	40	1	6	2	5	1	2	8	1	3	1	2	2	1	1	2	3	1	7	2	0	0	0	2	2	2	0	0	0	0	1	0	2	1	1	1	0	1	1	1	1	5	6	5	1	3
2	55	2	#NULL!	#NULL!	1	5	2	4	1	1	5	6	3	1	1	2	2	2	2	1	7	7	2	0	0	0	0	0	0	0	0	0	0	0	0	0	0	0	0	0	0	0	0	0	4	5	#NULL!	1	3
2	30	1	4	30	4	#NULL!	1	#NULL!	1	1	4	6	3	4	2	2	2	2	3	6	7	1	2	0	0	0	0	0	0	0	0	0	0	0	0	0	0	0	0	0	0	0	0	0	2	#NULL!	4	1	2
2	54	1	#NULL!	#NULL!	1	3	2	2	3	2	8	5	3	1	1	2	2	2	2	1	7	1	2	0	3	0	0	0	3	0	0	0	3	3	0	0	0	0	0	0	0	0	0	0	4	3	#NULL!	1	3
2	51	1	#NULL!	#NULL!	1	4	2	3	3	1	7	5	4	2	2	2	2	2	2	2	7	7	2	0	0	0	0	0	0	0	0	0	0	0	0	0	0	0	0	0	0	0	0	0	4	4	#NULL!	1	3
2	35	2	1	5	1	3	2	2	3	1	5	6	4	1	1	2	2	2	2	3	7	7	1	0	0	0	0	0	0	0	0	0	0	0	0	1	1	1	0	1	1	1	1	1	2	3	1	1	2
2	45	2	2	10	4	#NULL!	1	#NULL!	3	2	1	5	3	4	1	2	2	2	1	1	7	7	2	0	0	0	0	0	0	0	0	0	0	0	0	0	0	0	1	0	0	1	0	0	3	#NULL!	2	1	2
2	29	1	#NULL!	#NULL!	2	2	2	1	3	1	1	5	3	1	1	2	2	2	5	6	7	1	2	1	1	2	0	1	0	1	1	0	1	1	0	1	1	1	0	0	0	0	0	0	1	2	#NULL!	1	1
2	33	2	2	14	1	3	2	2	3	1	5	5	5	1	1	2	2	2	2	5	7	7	2	0	0	0	1	0	0	0	0	0	0	1	0	0	0	0	0	0	0	0	0	0	2	3	2	1	2
2	48	1	#NULL!	#NULL!	4	#NULL!	1	#NULL!	3	1	1	2	3	4	2	2	2	2	1	6	7	7	2	0	0	0	0	0	0	0	0	0	0	0	0	0	0	0	0	0	0	0	0	0	3	#NULL!	#NULL!	1	2
2	45	2	4	34	1	3	2	2	1	1	1	5	4	1	2	2	2	2	2	6	5	7	2	0	0	0	0	0	0	0	0	0	0	0	0	0	0	0	0	0	0	0	0	0	3	3	4	1	2
2	62	2	4	30	1	4	2	3	1	1	1	3	4	2	2	2	2	2	2	6	7	7	2	0	0	0	0	0	0	0	0	0	0	0	0	0	0	0	0	0	0	0	0	0	5	4	4	1	3
2	54	1	1	4	4	#NULL!	1	#NULL!	1	1	5	3	2	1	2	2	2	2	6	3	7	1	2	1	0	1	0	0	0	0	0	0	0	0	0	0	0	0	0	0	0	0	0	0	4	#NULL!	1	1	3
2	0	4	1	2	1	4	2	3	3	1	4	5	4	1	1	2	2	2	2	1	7	7	2	0	0	0	1	0	0	0	0	0	0	1	0	0	1	1	0	0	0	0	0	3	#NULL!	4	1	1	#NULL!
2	38	1	4	38	4	#NULL!	1	#NULL!	1	2	1	4	1	4	2	2	1	1	3	3	7	7	2	0	0	0	0	0	0	0	0	0	0	0	0	0	0	0	0	0	0	0	0	0	2	#NULL!	4	1	2
1	31	1	4	31	1	2	2	1	1	1	5	5	4	2	2	2	2	2	2	3	7	7	2	0	0	0	0	0	0	0	0	0	0	0	0	0	0	0	0	0	0	0	0	0	2	2	4	1	2
1	24	1	3	24	4	#NULL!	1	#NULL!	1	1	5	6	4	4	2	2	2	2	3	3	5	5	2	0	0	0	0	0	0	0	0	0	0	0	0	0	0	0	0	0	0	0	0	0	1	#NULL!	3	1	1
2	62	2	5	41	1	3	2	2	1	2	8	3	3	2	2	2	2	2	2	2	6	1	2	0	0	0	0	0	0	0	0	0	0	0	0	0	0	0	0	0	0	0	0	0	5	3	5	1	3
2	47	2	4	31	1	3	2	2	1	2	2	3	3	1	2	2	2	2	2	2	1	1	2	3	0	0	0	0	0	0	0	0	0	0	0	0	1	0	0	1	0	0	0	0	3	3	4	1	2
2	62	2	4	31	1	4	2	3	1	2	1	3	3	1	3	2	2	2	2	2	7	7	2	1	0	0	0	0	0	0	0	0	0	0	0	0	0	0	0	0	0	0	0	0	5	4	4	1	3
2	26	1	#NULL!	#NULL!	4	2	1	1	2	2	2	2	2	4	1	2	2	2	3	3	7	7	2	0	0	0	0	0	0	0	0	0	0	0	0	0	0	0	0	0	0	0	0	0	1	2	#NULL!	1	1
2	78	1	1	1	2	2	1	1	2	2	8	4	3	1	3	2	2	2	2	3	7	7	2	0	0	0	0	0	0	0	0	0	0	0	0	0	1	1	2	1	0	2	0	0	5	2	1	1	3
2	53	2	4	30	1	7	2	6	1	1	8	3	2	1	2	2	2	2	2	3	7	7	2	0	0	0	0	0	0	0	0	0	0	0	0	0	0	0	1	1	1	0	1	2	4	7	4	1	3
2	30	1	#NULL!	#NULL!	1	2	2	1	1	1	5	5	4	1	3	2	2	2	2	6	1	1	2	0	0	0	0	0	0	0	0	0	0	0	0	0	0	0	0	0	0	0	0	0	2	2	#NULL!	1	2
2	28	1	#NULL!	#NULL!	4	#NULL!	1	#NULL!	1	1	7	5	2	2	2	2	2	2	1	5	1	1	2	0	1	2	1	0	0	0	0	0	0	1	0	0	0	0	0	0	0	0	0	0	1	#NULL!	#NULL!	1	1
2	68	2	5	40	1	5	2	4	1	2	8	1	1	1	2	2	2	2	2	3	6	6	2	0	0	0	0	0	0	0	0	0	0	0	0	0	0	0	0	0	0	0	0	0	5	5	5	1	3
2	43	1	#NULL!	#NULL!	1	2	2	1	1	1	1	4	2	4	3	2	2	2	2	5	7	7	2	0	0	0	0	0	0	1	1	0	0	0	0	0	1	0	0	0	0	0	0	0	3	2	#NULL!	1	2
2	62	1	7	62	1	3	2	2	1	1	5	6	4	1	2	2	2	2	2	3	7	1	2	0	0	0	0	0	0	0	0	0	0	0	0	0	0	0	0	0	0	0	0	0	5	3	7	1	3
2	44	1	#NULL!	#NULL!	1	2	2	1	1	1	1	3	3	1	3	2	2	2	2	2	1	6	2	0	3	0	0	0	0	0	0	0	0	0	0	0	0	0	0	0	0	0	0	0	3	2	#NULL!	1	2
2	73	2	5	40	1	6	2	5	1	2	4	1	3	2	3	1	2	2	2	2	3	6	2	1	1	1	2	1	0	0	0	0	1	1	1	1	1	3	2	1	2	1	1	3	5	6	5	2	3
2	24	1	#NULL!	#NULL!	4	#NULL!	1	#NULL!	3	1	5	6	#NULL!	1	1	2	2	2	1	1	7	7	2	1	0	0	1	0	0	0	0	0	0	0	0	0	0	0	0	0	0	0	0	0	1	#NULL!	#NULL!	1	1
2	20	2	1	1	4	#NULL!	1	#NULL!	3	2	2	6	2	1	1	2	2	2	4	3	6	7	2	0	0	0	0	0	0	0	0	0	0	0	0	0	0	0	0	0	0	0	0	0	1	#NULL!	1	1	1
2	40	1	#NULL!	#NULL!	1	3	2	2	1	1	5	6	4	1	3	2	2	2	2	3	5	1	2	0	1	0	2	1	0	0	0	0	0	0	0	0	0	0	0	0	0	0	0	1	3	3	#NULL!	1	2
2	51	1	#NULL!	#NULL!	1	7	2	6	1	2	8	3	2	1	3	2	2	2	2	1	7	7	2	0	0	0	0	0	0	0	0	0	0	0	0	0	0	0	0	0	0	0	0	0	4	7	#NULL!	1	3
2	19	1	#NULL!	#NULL!	4	#NULL!	1	#NULL!	1	1	1	5	2	3	1	2	2	2	3	3	5	7	1	1	1	1	1	1	1	2	1	1	1	1	1	1	1	1	1	1	1	1	1	1	1	#NULL!	#NULL!	2	1
2	48	2	2	18	1	4	2	3	1	1	8	3	2	3	1	2	2	2	2	5	1	1	2	1	1	1	1	1	1	1	1	1	1	1	1	1	1	1	1	1	1	1	1	1	3	4	2	#NULL!	2
2	44	2	#NULL!	#NULL!	1	3	2	2	1	1	1	1	2	2	3	2	2	2	2	3	5	5	2	0	1	3	0	0	3	0	1	0	1	0	1	0	1	1	0	1	0	2	0	1	3	3	#NULL!	1	2
2	38	1	#NULL!	#NULL!	1	2	2	1	1	1	5	4	2	1	3	2	2	2	2	5	7	7	2	0	0	0	0	0	0	0	0	0	0	0	0	0	0	0	0	0	0	0	0	0	2	2	#NULL!	1	2
2	40	1	5	40	2	2	2	1	1	1	3	2	2	2	2	2	2	2	2	3	6	7	2	1	1	0	2	1	0	1	0	0	1	1	0	1	1	3	0	1	0	0	0	0	3	2	5	1	2
2	50	2	5	41	1	3	2	2	1	1	4	6	4	1	2	2	2	2	2	1	7	7	2	0	0	0	0	0	0	0	0	0	0	0	0	0	0	0	0	0	0	0	0	0	4	3	5	1	3
2	64	1	#NULL!	#NULL!	1	4	2	3	1	2	8	3	2	1	3	2	2	2	2	1	7	7	2	0	0	0	0	0	0	0	0	0	0	0	0	0	0	0	0	0	0	0	0	0	5	4	#NULL!	1	3
2	28	1	#NULL!	#NULL!	4	#NULL!	1	#NULL!	1	1	7	3	3	3	1	2	2	2	3	3	7	7	2	1	1	1	1	1	1	1	1	1	1	1	1	1	1	1	1	1	1	1	1	1	1	#NULL!	#NULL!	2	1
2	47	2	#NULL!	#NULL!	1	2	2	1	1	1	1	3	2	2	2	2	2	2	2	3	5	6	2	0	0	0	0	0	0	0	0	0	0	0	0	0	0	0	0	0	0	0	0	0	3	2	#NULL!	1	2
2	64	1	#NULL!	#NULL!	1	3	2	2	1	2	8	5	2	1	3	2	2	2	2	1	1	1	2	0	0	0	0	0	0	0	0	0	0	0	0	1	0	0	0	0	0	0	0	0	5	3	#NULL!	1	3
2	47	1	#NULL!	#NULL!	1	4	2	3	1	1	5	3	1	1	2	2	2	2	2	1	5	7	2	0	3	0	1	0	0	0	3	0	0	1	0	0	0	0	0	1	0	0	0	0	3	4	#NULL!	1	2
2	50	2	5	41	1	2	2	1	1	1	4	4	4	1	3	1	2	2	2	3	1	1	2	0	0	0	0	0	0	0	0	0	0	0	0	0	0	0	0	0	0	0	0	0	4	2	5	1	3
2	64	2	5	42	1	6	2	5	1	2	8	3	3	1	2	1	2	2	2	3	1	1	2	0	0	0	0	0	0	0	0	0	0	0	0	1	0	1	1	1	2	0	2	3	5	6	5	1	3
2	56	1	#NULL!	#NULL!	1	5	2	4	1	2	8	3	2	2	2	2	2	2	2	3	4	5	2	0	0	0	0	0	0	0	0	0	0	0	0	0	0	0	0	0	0	0	0	0	4	5	#NULL!	1	3
2	29	2	1	5	6	#NULL!	1	#NULL!	1	1	7	5	3	3	1	2	2	2	1	6	7	7	2	0	3	1	1	0	0	1	1	1	0	1	1	1	0	0	1	0	1	0	1	0	1	#NULL!	1	1	1
2	30	2	4	30	4	#NULL!	1	#NULL!	1	1	1	2	3	4	1	2	2	2	3	3	7	7	2	0	0	0	0	0	0	0	0	0	0	0	0	0	0	0	0	0	0	0	0	0	2	#NULL!	4	1	2
2	64	2	5	42	1	2	2	1	1	2	8	2	3	1	2	2	2	2	2	3	7	7	2	0	0	0	0	0	0	0	0	0	0	0	0	0	0	0	0	0	0	0	0	0	5	2	5	1	3
2	33	1	#NULL!	#NULL!	4	#NULL!	1	#NULL!	1	1	1	2	3	1	2	2	2	2	2	3	7	7	2	0	0	0	0	0	0	0	0	0	0	0	0	0	0	0	0	0	0	0	0	0	2	#NULL!	#NULL!	1	2
2	63	2	5	42	1	4	2	3	1	2	8	4	4	1	1	2	2	2	2	3	7	7	2	0	0	0	0	0	0	0	0	0	0	0	0	0	0	0	0	0	0	0	0	0	5	4	5	1	3
2	40	1	#NULL!	#NULL!	1	4	2	3	1	1	1	6	3	4	1	2	2	2	2	5	7	7	2	0	0	0	0	0	0	0	0	0	0	0	0	0	0	0	0	0	0	0	0	0	3	4	#NULL!	1	2
2	30	2	3	20	1	3	2	2	1	1	1	5	3	1	1	2	2	2	2	3	1	1	2	1	1	0	1	1	0	1	1	0	0	1	1	1	1	1	1	1	1	1	0	0	2	3	3	1	2
2	19	1	#NULL!	#NULL!	4	#NULL!	1	#NULL!	1	2	2	5	2	3	1	2	2	2	3	3	1	1	2	0	0	0	0	0	0	0	0	0	0	0	0	0	0	0	0	0	0	0	0	0	1	#NULL!	#NULL!	1	1
2	30	2	#NULL!	#NULL!	1	#NULL!	1	#NULL!	3	1	5	6	4	1	3	2	2	2	2	3	7	7	2	0	0	0	0	0	0	0	0	0	0	0	0	0	0	0	0	0	0	0	0	0	2	#NULL!	#NULL!	1	2
2	34	1	#NULL!	#NULL!	1	2	2	1	3	1	7	5	2	4	3	2	2	2	3	6	7	7	2	1	0	0	1	0	0	1	0	0	0	0	0	0	0	0	0	1	0	0	0	0	2	2	#NULL!	1	2
2	19	1	#NULL!	#NULL!	4	#NULL!	1	#NULL!	1	2	2	6	1	4	1	2	2	2	3	1	4	1	2	1	2	1	2	1	2	1	3	3	3	3	1	1	2	3	0	0	0	0	0	1	1	#NULL!	#NULL!	2	1
2	28	1	#NULL!	#NULL!	1	#NULL!	1	#NULL!	3	1	4	6	4	1	1	2	2	2	2	3	7	7	2	1	1	1	1	1	0	0	1	0	1	1	1	0	0	0	0	1	0	0	0	0	1	#NULL!	#NULL!	1	1
2	26	1	#NULL!	#NULL!	3	#NULL!	1	#NULL!	3	1	4	5	3	1	1	2	2	2	1	1	7	7	2	0	0	0	0	0	0	0	0	0	0	0	0	0	0	0	0	0	0	0	0	0	1	#NULL!	#NULL!	1	1
2	23	1	#NULL!	#NULL!	3	#NULL!	1	#NULL!	3	2	2	6	1	4	1	2	2	1	3	3	7	7	1	0	2	0	0	0	2	0	1	0	1	1	0	0	0	0	0	0	0	0	1	0	1	#NULL!	#NULL!	1	1
2	59	1	#NULL!	#NULL!	1	2	2	1	3	1	4	4	2	1	3	2	2	2	2	1	7	7	2	1	1	0	0	0	0	0	0	0	0	0	0	1	0	1	0	1	0	2	0	0	4	2	#NULL!	1	3
2	40	1	#NULL!	#NULL!	1	#NULL!	1	#NULL!	3	1	5	6	3	4	1	2	2	1	2	1	7	7	2	1	0	0	1	0	0	1	1	0	0	0	1	0	0	0	0	0	1	2	0	0	3	#NULL!	#NULL!	1	2
2	46	2	#NULL!	#NULL!	1	4	2	3	3	1	1	3	2	3	3	2	2	2	2	3	1	7	2	0	0	0	0	0	0	0	2	0	1	0	0	0	0	1	0	0	0	0	0	0	3	4	#NULL!	1	2
1	73	1	#NULL!	#NULL!	6	4	2	3	3	2	7	5	3	1	1	2	2	1	1	1	7	7	2	0	1	0	1	0	0	0	1	0	1	0	1	1	0	2	1	1	1	2	1	3	5	4	#NULL!	2	3
1	49	2	#NULL!	#NULL!	6	2	2	1	3	2	6	3	3	1	1	2	2	2	3	3	1	1	2	1	2	1	1	0	0	1	1	0	3	1	1	2	2	1	1	1	0	0	1	2	3	2	#NULL!	2	2
1	55	1	#NULL!	#NULL!	6	3	2	2	3	2	8	5	2	3	2	2	2	2	6	3	7	7	2	1	0	0	1	0	0	0	1	0	1	1	1	1	0	0	1	1	1	0	2	0	4	3	#NULL!	1	3
1	33	1	#NULL!	#NULL!	1	2	2	1	3	1	4	6	3	1	1	2	2	2	2	1	7	1	2	0	1	0	0	0	0	0	0	0	0	0	0	0	0	0	0	0	0	0	1	0	2	2	#NULL!	1	2
1	19	2	#NULL!	#NULL!	4	#NULL!	1	#NULL!	3	2	2	6	2	3	1	2	2	2	6	6	1	1	2	1	1	1	1	1	0	1	1	0	0	1	1	2	0	2	0	1	1	0	0	0	1	#NULL!	#NULL!	1	1
1	23	2	#NULL!	#NULL!	3	#NULL!	1	#NULL!	3	2	2	6	1	3	1	2	2	2	1	5	7	7	2	3	1	2	1	1	3	1	1	0	2	1	1	2	1	1	1	1	0	0	0	0	1	#NULL!	#NULL!	2	1
1	20	2	#NULL!	#NULL!	3	#NULL!	1	#NULL!	3	2	2	6	3	4	1	2	2	1	3	3	4	1	2	0	0	0	1	0	0	0	0	0	0	0	0	0	0	0	0	0	0	0	0	0	1	#NULL!	#NULL!	1	1
1	23	1	#NULL!	#NULL!	4	#NULL!	1	#NULL!	3	2	2	6	1	4	1	2	2	2	3	3	6	3	2	0	0	0	0	0	0	0	1	0	1	1	0	1	0	1	0	2	0	0	0	0	1	#NULL!	#NULL!	1	1
2	62	1	#NULL!	#NULL!	1	4	2	3	3	2	7	3	3	1	1	1	2	2	2	1	7	7	2	0	0	0	0	0	0	0	0	0	2	0	1	0	0	2	1	1	0	0	2	0	5	4	#NULL!	1	3
2	59	1	#NULL!	#NULL!	1	4	2	3	1	1	7	4	2	1	1	1	2	2	2	1	6	7	2	1	3	0	0	0	3	0	0	0	0	1	0	0	0	1	0	1	0	0	0	0	4	4	#NULL!	1	3
2	44	1	#NULL!	#NULL!	1	2	2	1	1	1	4	5	3	1	1	2	2	2	2	2	7	7	2	0	0	0	0	0	0	0	0	0	0	3	0	0	0	0	0	0	0	0	0	0	3	2	#NULL!	1	2
2	49	1	#NULL!	#NULL!	1	4	2	3	1	1	4	6	4	1	1	2	2	2	2	1	7	7	2	1	1	0	2	1	0	0	2	0	0	0	0	0	0	1	1	1	0	0	0	0	3	4	#NULL!	1	2
2	36	1	#NULL!	#NULL!	1	2	2	1	1	1	4	6	4	1	2	2	2	2	2	1	7	7	2	0	0	0	0	0	0	0	0	0	0	0	0	0	0	0	0	0	0	0	0	0	2	2	#NULL!	1	2
2	30	1	#NULL!	#NULL!	4	#NULL!	1	#NULL!	1	1	5	3	3	4	1	2	2	2	3	5	7	7	1	2	2	2	2	0	2	0	0	0	3	2	0	2	1	1	0	1	0	0	0	2	2	#NULL!	#NULL!	2	2
2	19	1	#NULL!	#NULL!	4	#NULL!	1	#NULL!	1	2	2	6	1	4	1	2	2	2	3	3	4	1	2	0	0	0	0	0	0	0	0	0	0	0	0	0	0	0	0	0	0	0	0	0	1	#NULL!	#NULL!	1	1
2	19	1	#NULL!	#NULL!	3	#NULL!	1	#NULL!	1	1	2	6	3	1	1	2	2	2	3	4	7	1	2	0	0	0	0	0	0	0	0	0	0	0	0	0	0	0	0	0	0	0	0	0	1	#NULL!	#NULL!	1	1
1	48	1	#NULL!	#NULL!	1	4	2	3	1	2	6	4	2	1	1	2	2	2	2	1	2	1	2	0	0	0	1	0	0	0	0	0	1	3	0	0	0	0	1	1	1	0	0	0	3	4	#NULL!	1	2
1	45	1	#NULL!	#NULL!	1	3	2	2	1	1	5	5	3	4	1	1	2	1	2	2	7	7	2	1	1	0	1	0	0	1	2	0	2	0	1	2	2	1	1	1	0	1	1	0	3	3	#NULL!	2	2
1	68	1	#NULL!	#NULL!	1	4	2	3	1	2	6	4	3	1	1	2	1	1	2	2	2	6	2	0	0	0	0	0	0	0	2	0	3	0	0	2	1	1	0	1	0	0	0	3	5	4	#NULL!	1	3
1	50	1	#NULL!	#NULL!	1	3	2	2	2	1	4	5	4	1	1	2	2	2	2	3	1	2	2	0	0	0	0	0	0	0	1	0	3	1	0	1	0	1	1	1	1	0	2	0	4	3	#NULL!	1	3
1	39	1	#NULL!	#NULL!	1	2	2	1	1	2	6	3	3	1	1	2	2	2	2	2	3	7	2	2	3	1	1	2	3	1	1	0	3	1	1	2	1	1	1	1	2	2	0	2	2	2	#NULL!	2	2
1	33	1	#NULL!	#NULL!	4	2	1	1	2	2	6	5	3	1	1	2	1	1	3	2	2	7	2	2	2	0	2	2	2	0	2	0	2	0	1	1	1	1	1	1	0	2	1	2	2	2	#NULL!	2	2
1	27	1	#NULL!	#NULL!	1	2	2	1	1	1	4	6	4	1	1	2	2	2	2	1	7	7	1	0	0	0	1	0	0	0	0	0	1	0	1	0	0	0	1	1	0	0	0	0	1	2	#NULL!	1	1
1	31	2	1	5	1	3	2	2	3	2	6	5	3	3	3	2	2	2	2	5	2	2	2	0	0	0	1	0	0	0	1	0	3	1	0	1	1	0	0	1	1	0	0	1	2	3	1	1	2
1	58	1	#NULL!	#NULL!	1	3	2	2	3	1	4	5	5	1	1	2	2	2	2	2	1	1	2	0	0	0	0	0	0	0	0	0	0	0	0	1	0	0	0	1	0	1	1	0	4	3	#NULL!	1	3
1	27	1	#NULL!	#NULL!	3	#NULL!	1	#NULL!	3	1	8	6	5	4	1	2	2	2	3	2	7	7	2	1	3	0	1	1	0	0	1	0	2	2	0	1	0	0	0	1	0	1	0	0	1	#NULL!	#NULL!	1	1
2	50	1	#NULL!	#NULL!	4	#NULL!	1	#NULL!	3	1	7	6	4	1	3	2	2	2	1	2	7	1	2	1	0	0	0	1	0	0	1	0	0	0	2	0	1	0	0	0	0	0	0	0	4	#NULL!	#NULL!	1	3
2	32	2	#NULL!	#NULL!	4	2	2	1	3	1	8	6	5	1	1	2	2	2	6	5	7	7	2	0	0	0	0	0	0	0	0	0	0	2	0	0	1	0	0	0	0	0	0	0	2	2	#NULL!	1	2
2	70	1	#NULL!	#NULL!	1	3	2	2	1	2	8	3	4	2	3	1	2	2	2	2	7	7	2	0	0	1	1	0	0	0	1	0	2	1	0	0	1	2	0	0	0	0	0	0	5	3	#NULL!	1	3
1	48	1	#NULL!	#NULL!	1	4	2	3	1	1	7	5	4	1	2	2	2	2	2	2	6	2	2	1	0	0	0	0	0	0	1	0	1	0	0	0	0	0	0	0	0	1	0	2	3	4	#NULL!	1	2
2	25	2	1	9	4	#NULL!	1	#NULL!	3	1	1	4	5	3	1	2	2	2	3	5	7	7	2	2	1	2	3	1	3	2	1	1	1	1	3	3	0	3	1	1	0	0	0	0	1	#NULL!	1	2	1
2	34	1	#NULL!	#NULL!	1	2	2	1	3	1	8	5	3	4	2	2	2	2	2	2	2	7	2	0	1	0	1	1	0	0	0	1	0	1	0	0	1	0	0	0	0	0	0	0	2	2	#NULL!	1	2
2	34	1	#NULL!	#NULL!	1	2	2	1	3	1	1	4	2	3	1	2	2	2	2	1	7	1	2	0	2	0	1	0	0	0	0	0	0	2	1	1	0	2	1	0	1	1	0	1	2	2	#NULL!	1	2
2	27	1	#NULL!	#NULL!	2	#NULL!	1	#NULL!	3	1	8	6	4	4	2	2	2	1	3	1	7	7	2	0	1	0	0	0	0	0	1	0	0	0	0	0	0	1	1	1	0	0	0	0	1	#NULL!	#NULL!	1	1
1	60	1	#NULL!	#NULL!	1	3	2	2	2	1	1	5	4	1	1	2	2	2	2	5	6	1	2	0	0	0	0	0	0	0	1	0	0	0	0	0	1	0	0	1	0	0	0	0	5	3	#NULL!	1	3
2	40	1	#NULL!	#NULL!	1	3	2	2	3	1	8	6	4	1	3	2	2	2	2	1	7	1	2	0	0	0	0	0	0	0	1	0	0	0	0	0	1	0	0	0	0	0	0	0	3	3	#NULL!	1	2
2	35	2	2	13	1	2	2	1	3	1	1	3	4	3	1	2	2	2	4	5	7	7	2	2	0	0	3	0	3	0	0	0	0	2	0	0	0	0	0	0	0	0	0	0	2	2	2	1	2
1	30	2	1	4	1	4	2	3	1	2	3	4	3	3	1	2	2	2	2	5	1	1	2	1	0	0	3	1	3	2	2	0	3	0	1	0	0	1	2	1	0	0	1	0	2	4	1	2	2
2	37	2	2	16	1	4	2	3	3	1	1	4	4	3	1	2	2	2	2	5	6	7	2	0	0	0	0	0	0	0	0	0	0	0	0	0	1	0	0	1	0	0	0	0	2	4	2	1	2
1	72	4	7	68	6	2	2	1	3	2	8	3	4	1	3	2	2	2	1	2	3	7	2	2	0	0	0	0	0	0	0	0	1	0	0	0	2	2	3	2	0	0	1	0	5	2	7	1	3
1	71	2	3	22	6	5	2	4	3	2	8	5	2	4	3	2	2	1	1	5	1	7	2	1	2	0	3	0	3	0	0	0	3	0	3	0	1	2	1	3	3	3	0	0	5	5	3	2	3
2	24	2	1	7	4	#NULL!	1	#NULL!	3	1	1	4	3	1	1	2	2	2	3	5	7	1	2	2	0	0	0	0	0	0	1	0	1	2	2	1	0	0	1	2	0	0	1	0	1	#NULL!	1	1	1
1	57	1	#NULL!	#NULL!	1	2	2	1	3	2	8	3	3	1	2	2	2	2	2	2	1	1	2	1	0	0	0	0	0	0	1	0	0	1	0	0	1	0	1	1	0	0	0	0	4	2	#NULL!	1	3
2	65	1	#NULL!	#NULL!	1	3	2	2	2	2	8	6	4	1	1	1	2	2	2	2	7	1	2	0	1	0	1	1	1	0	1	0	1	0	0	0	1	1	0	1	0	0	1	0	5	3	#NULL!	1	3
1	54	1	#NULL!	#NULL!	1	3	2	2	2	1	8	5	4	1	2	2	2	2	2	2	1	1	2	0	0	0	0	1	0	0	0	0	1	0	0	0	1	1	0	1	0	3	0	0	4	3	#NULL!	1	3
1	54	2	4	30	6	3	2	2	3	2	8	3	3	3	1	1	1	1	6	2	1	7	2	0	0	0	1	0	0	0	1	0	3	0	0	1	1	1	1	1	0	0	1	0	4	3	4	1	3
1	76	1	#NULL!	#NULL!	6	5	2	4	3	2	8	2	3	2	2	1	2	2	1	1	1	7	2	1	0	0	3	0	0	0	0	0	1	0	3	1	0	3	0	0	0	0	0	0	5	5	#NULL!	1	3
1	24	2	#NULL!	#NULL!	1	2	2	1	3	2	6	4	3	3	1	2	2	2	2	5	7	7	2	0	0	0	0	0	0	0	0	0	0	0	0	0	1	0	0	1	1	1	0	0	1	2	#NULL!	1	1
1	41	2	2	12	1	4	2	3	1	2	6	3	3	3	1	2	2	2	2	5	3	7	2	1	1	0	1	1	0	2	2	0	1	1	1	0	1	1	0	1	0	0	0	1	3	4	2	1	2
1	43	1	#NULL!	#NULL!	4	#NULL!	1	#NULL!	3	1	4	5	4	1	1	1	2	2	1	5	4	7	2	0	0	0	1	0	0	0	0	0	0	0	0	2	0	1	0	1	1	2	0	0	3	#NULL!	#NULL!	1	2
1	30	4	1	8	1	3	2	2	3	2	6	4	3	3	1	2	2	2	2	2	1	1	2	3	1	0	1	0	0	0	0	0	1	0	0	0	0	0	0	2	0	0	0	0	2	3	1	1	2
1	50	2	1	3	1	3	2	2	2	2	#NULL!	3	2	3	3	2	2	2	2	2	1	1	2	0	0	0	0	0	0	0	1	0	0	0	0	1	1	0	0	1	0	0	0	0	4	3	1	1	3
1	47	2	2	10	1	3	2	2	3	2	6	3	2	3	1	2	2	2	2	5	1	1	2	3	3	0	2	1	0	0	0	0	2	2	3	1	2	1	3	2	0	0	1	2	3	3	2	2	2
1	73	1	#NULL!	#NULL!	1	4	2	3	2	2	8	3	3	4	3	2	2	2	2	2	7	1	2	1	0	0	1	0	0	0	1	0	3	2	0	1	1	2	1	1	0	0	1	0	5	4	#NULL!	1	3
2	48	1	#NULL!	#NULL!	1	3	2	2	3	1	4	5	4	1	2	2	2	2	2	1	7	1	2	0	0	0	0	0	0	0	1	0	0	0	0	0	0	0	0	0	0	1	0	0	3	3	#NULL!	1	2
2	59	1	#NULL!	#NULL!	1	3	2	2	2	2	8	6	4	1	3	2	2	2	2	1	4	7	2	0	0	0	0	0	0	0	0	0	0	0	0	0	0	0	0	1	0	0	0	0	4	3	#NULL!	1	3
2	63	1	#NULL!	#NULL!	1	3	2	2	3	2	8	3	3	1	3	2	2	1	2	1	7	7	2	0	3	0	1	0	0	0	1	0	1	1	1	1	0	1	0	1	0	0	1	0	5	3	#NULL!	1	3
2	43	2	1	6	1	3	2	2	3	1	8	5	3	1	1	2	2	2	1	4	5	7	2	0	1	0	0	0	0	0	1	0	0	1	0	0	0	0	0	0	1	0	0	0	3	3	1	1	2
1	26	1	#NULL!	#NULL!	5	2	2	1	3	2	7	6	3	3	2	2	1	1	6	1	7	7	2	3	3	3	2	2	3	2	3	1	2	2	2	2	2	3	1	2	3	2	3	3	1	2	#NULL!	2	1
2	30	1	#NULL!	#NULL!	4	#NULL!	1	#NULL!	3	1	5	5	4	4	3	2	2	2	1	2	7	7	2	3	0	2	1	1	1	0	0	0	1	0	0	0	0	0	0	0	0	0	0	0	2	#NULL!	#NULL!	1	2
2	74	1	5	42	4	3	2	2	3	2	8	5	2	1	2	1	2	2	2	4	7	7	2	0	2	0	1	0	0	0	0	0	0	0	0	0	1	1	2	1	1	1	1	3	5	3	5	1	3
2	68	1	#NULL!	#NULL!	1	5	2	4	2	2	8	5	3	1	2	2	2	2	2	1	7	7	2	0	1	0	0	0	0	0	0	0	0	0	0	1	1	1	1	1	0	0	1	2	5	5	#NULL!	1	3
2	70	2	5	42	1	3	2	2	3	2	8	2	3	4	3	1	2	2	2	1	7	7	2	0	0	0	1	0	0	0	0	0	0	0	0	2	1	3	2	1	0	0	1	3	5	3	5	1	3
1	22	1	#NULL!	#NULL!	4	#NULL!	1	#NULL!	1	1	1	5	2	3	1	2	2	2	4	3	7	7	2	2	2	0	1	1	0	0	1	0	1	0	0	1	0	1	0	2	2	0	2	0	1	#NULL!	#NULL!	1	1
2	43	1	#NULL!	#NULL!	1	3	2	2	2	1	8	6	4	4	1	2	2	2	2	1	7	7	2	0	0	0	0	0	0	0	0	0	0	0	0	0	0	0	0	0	0	0	0	0	3	3	#NULL!	1	2
2	54	1	#NULL!	#NULL!	1	3	2	2	3	1	5	5	3	1	1	2	2	2	2	1	7	7	2	0	0	0	0	0	0	0	1	0	0	0	0	0	0	0	0	1	0	0	0	1	4	3	#NULL!	1	3
1	38	1	#NULL!	#NULL!	1	3	2	2	3	2	6	5	3	1	3	2	2	2	2	3	6	7	2	1	1	0	0	1	3	0	0	0	1	1	0	1	0	3	0	3	0	0	0	0	2	3	#NULL!	1	2
2	51	2	5	42	1	3	2	2	3	1	8	5	3	4	2	2	2	2	2	4	7	7	2	0	0	0	0	0	0	0	1	0	3	1	0	0	0	0	0	0	0	2	0	0	4	3	5	1	3
2	59	2	5	40	1	3	2	2	3	1	7	5	3	2	2	2	1	1	2	1	6	7	2	0	0	0	0	0	0	0	0	0	3	3	0	0	0	0	0	0	0	0	0	0	4	3	5	1	3
2	27	1	#NULL!	#NULL!	2	#NULL!	1	#NULL!	3	1	5	6	4	4	3	2	2	2	3	1	7	1	2	0	0	0	0	0	0	0	1	0	0	0	0	0	0	0	0	0	0	0	0	0	1	#NULL!	#NULL!	1	1
2	25	1	#NULL!	#NULL!	3	#NULL!	1	#NULL!	3	2	2	6	4	4	2	2	2	2	3	1	7	7	2	0	0	0	0	0	0	0	0	0	0	0	0	0	0	0	0	0	1	1	0	0	1	#NULL!	#NULL!	1	1
1	36	1	#NULL!	#NULL!	5	2	2	1	3	2	6	5	2	4	3	2	2	2	3	3	6	7	2	1	1	1	1	1	1	2	1	0	3	3	1	1	0	0	0	1	0	0	0	0	2	2	#NULL!	2	2
1	32	2	1	9	1	#NULL!	1	#NULL!	3	1	1	5	2	3	1	2	2	2	2	3	1	1	2	0	0	0	0	0	0	0	0	0	0	0	0	0	0	0	0	0	0	0	0	0	2	#NULL!	1	1	2
2	49	1	#NULL!	#NULL!	5	2	2	1	3	1	5	5	4	4	3	2	2	2	1	2	7	1	2	0	2	0	1	2	1	0	1	0	0	1	1	1	0	1	0	0	0	0	0	0	3	2	#NULL!	1	2
1	30	1	#NULL!	#NULL!	1	#NULL!	1	#NULL!	3	1	8	6	3	1	1	2	2	2	2	2	6	7	2	0	0	0	0	0	0	0	0	0	0	1	0	0	0	0	0	0	0	0	0	0	2	#NULL!	#NULL!	1	2
2	22	2	2	13	4	#NULL!	1	#NULL!	3	1	1	6	4	3	1	2	2	2	1	2	7	1	2	0	1	0	1	0	0	0	1	0	1	1	0	1	0	0	1	1	1	2	1	0	1	#NULL!	2	1	1
2	50	2	3	23	1	#NULL!	1	#NULL!	3	1	1	4	3	3	1	2	2	2	2	5	7	7	2	0	0	0	0	0	0	0	0	0	1	0	0	1	1	1	0	0	0	0	1	0	4	#NULL!	3	1	3
1	49	2	3	27	1	3	2	2	3	1	5	3	2	3	1	2	2	2	2	3	2	1	2	2	2	0	0	1	0	1	1	0	2	3	0	0	1	0	2	0	0	0	0	0	3	3	3	1	2
1	43	1	#NULL!	#NULL!	1	3	2	2	3	1	1	5	3	4	2	2	2	2	2	1	6	1	2	1	0	0	1	0	0	0	1	0	1	3	0	0	0	0	0	1	0	0	0	0	3	3	#NULL!	1	2
2	40	1	#NULL!	#NULL!	1	2	2	1	1	1	5	5	3	4	3	2	2	2	2	1	7	7	2	0	1	0	0	0	0	0	0	0	0	0	0	0	0	0	0	0	0	0	0	0	3	2	#NULL!	1	2
1	45	1	5	41	1	2	2	1	3	1	4	6	3	3	3	2	2	2	2	1	7	7	2	0	1	0	0	0	0	0	0	0	0	1	1	0	1	0	2	1	0	0	0	0	3	2	5	1	2
2	26	1	#NULL!	#NULL!	1	2	2	1	1	1	5	5	2	4	1	2	2	2	2	2	7	7	2	0	1	0	0	1	1	0	0	0	0	0	0	0	0	0	0	0	1	0	0	0	1	2	#NULL!	1	1
2	32	1	#NULL!	#NULL!	1	#NULL!	1	#NULL!	3	1	5	6	3	4	2	2	2	2	2	3	1	2	2	0	0	0	1	1	0	0	0	0	0	1	1	0	0	1	0	1	0	0	0	0	2	#NULL!	#NULL!	1	2
1	24	4	1	7	1	2	2	1	3	2	2	6	2	4	1	2	2	2	2	1	5	7	2	1	1	2	3	1	3	3	1	3	2	2	2	0	2	2	1	0	0	0	0	3	1	2	1	2	1
1	27	2	1	6	1	3	2	2	3	1	6	5	2	3	3	2	2	2	5	5	1	1	2	1	3	0	1	1	3	2	1	0	1	2	0	1	2	1	0	2	0	0	2	0	1	3	1	2	1
2	61	1	#NULL!	#NULL!	1	3	2	2	3	1	4	6	3	1	3	2	2	2	2	1	7	7	2	2	1	1	2	2	1	2	1	0	1	1	0	1	1	1	1	1	0	0	1	1	5	3	#NULL!	2	3
1	52	1	#NULL!	#NULL!	1	4	2	3	1	1	7	4	2	2	1	2	2	2	2	1	3	1	2	1	1	0	1	1	1	0	0	0	2	2	2	1	1	2	3	1	1	0	0	1	4	4	#NULL!	2	3
1	77	1	#NULL!	#NULL!	6	4	2	3	1	1	7	5	3	5	1	1	2	2	1	6	7	1	2	1	2	0	3	0	0	0	0	0	2	0	2	0	2	2	1	1	0	0	0	3	5	4	#NULL!	2	3
1	70	1	#NULL!	#NULL!	6	5	2	4	1	1	7	3	2	4	1	1	2	2	1	6	1	1	2	1	1	0	3	0	0	0	0	0	2	0	2	0	0	2	1	1	0	0	0	3	5	5	#NULL!	1	3
2	55	1	#NULL!	#NULL!	1	3	2	2	1	1	1	4	4	4	2	2	2	2	2	3	6	7	2	1	1	0	0	0	0	0	0	0	1	0	0	0	0	0	0	1	0	3	0	0	4	3	#NULL!	1	3
2	41	2	4	31	1	5	2	4	1	1	5	5	3	1	1	2	2	2	2	3	7	7	2	1	0	0	0	0	0	0	0	0	0	1	0	0	0	0	1	0	0	0	0	0	3	5	4	1	2
2	40	2	4	35	1	5	2	4	3	1	8	5	4	1	1	2	2	2	2	1	5	6	2	1	0	1	0	0	0	0	1	0	0	1	0	0	0	0	0	0	0	0	0	0	3	5	4	1	2
1	45	1	#NULL!	#NULL!	6	3	2	2	1	1	5	5	2	1	1	2	2	2	6	3	1	1	2	1	1	0	0	0	0	0	0	0	1	1	3	0	1	2	0	1	0	0	0	0	3	3	#NULL!	1	2
1	41	1	#NULL!	#NULL!	6	4	2	3	1	1	5	4	3	1	1	2	2	2	6	3	7	7	2	1	1	0	0	0	0	0	0	0	1	1	3	0	1	2	0	1	0	0	0	0	3	4	#NULL!	1	2
1	55	1	#NULL!	#NULL!	1	4	2	3	3	1	4	4	4	4	1	2	2	2	2	1	5	7	2	1	0	1	1	1	0	0	1	0	1	1	0	0	1	1	1	1	0	3	0	0	4	4	#NULL!	1	3
1	50	1	#NULL!	#NULL!	1	3	2	2	3	1	4	5	5	5	1	2	2	2	2	1	5	7	2	1	0	0	1	0	0	0	0	0	1	1	0	0	1	1	1	2	0	1	0	0	4	3	#NULL!	1	3
1	53	4	2	13	1	2	2	1	3	2	8	6	5	5	1	2	2	2	5	2	1	3	2	0	1	1	2	3	3	2	2	2	0	0	1	1	2	2	2	2	2	0	0	3	4	2	2	2	3
2	50	1	#NULL!	#NULL!	1	3	2	2	3	2	8	4	5	1	1	2	2	2	2	1	7	7	2	1	0	0	0	0	0	0	0	0	0	1	0	0	0	0	0	0	0	0	0	0	4	3	#NULL!	1	3
2	45	1	#NULL!	#NULL!	1	3	2	2	3	1	4	6	4	1	1	2	2	2	2	1	7	7	2	1	1	1	1	1	1	1	1	0	1	1	1	1	1	1	1	1	1	1	1	0	3	3	#NULL!	2	2
2	43	2	4	34	1	3	2	2	3	1	8	5	4	1	1	2	2	2	2	1	7	7	2	1	0	1	0	0	0	0	1	0	0	1	0	0	0	0	0	0	0	0	0	0	3	3	4	1	2
1	38	1	#NULL!	#NULL!	1	3	2	2	3	2	6	4	4	5	1	2	2	2	2	1	7	7	2	1	0	0	0	0	0	0	1	0	0	0	1	1	0	0	0	0	0	0	0	0	2	3	#NULL!	1	2
2	40	2	4	30	5	3	2	2	3	1	1	4	3	1	1	2	2	2	2	3	7	7	1	2	0	0	1	1	0	2	1	1	2	0	0	0	0	1	1	1	1	3	0	0	3	3	4	2	2
2	46	1	#NULL!	#NULL!	4	#NULL!	1	#NULL!	1	1	1	3	3	3	1	2	2	2	3	1	7	7	1	0	0	0	0	0	0	0	0	0	0	0	0	0	0	0	0	0	0	0	0	0	3	#NULL!	#NULL!	1	2
2	63	1	#NULL!	#NULL!	1	4	2	3	1	2	8	5	3	1	1	1	2	2	2	2	7	1	1	1	0	0	0	0	0	0	0	0	0	0	0	0	1	1	0	1	1	0	1	1	5	4	#NULL!	1	3
2	58	1	#NULL!	#NULL!	4	2	1	1	1	2	3	3	2	5	2	2	2	2	3	4	6	7	2	1	0	0	1	0	0	0	0	0	0	0	0	0	0	0	0	0	0	1	1	1	4	2	#NULL!	1	3
2	65	1	#NULL!	#NULL!	1	5	2	4	1	2	8	3	2	1	2	2	2	2	1	2	7	7	1	2	0	0	1	3	3	0	0	0	0	1	1	2	3	3	0	2	2	0	2	1	5	5	#NULL!	2	3
1	31	1	#NULL!	#NULL!	6	4	2	3	1	2	5	5	2	1	2	2	2	2	6	3	2	3	2	0	0	0	0	0	0	0	0	0	0	0	0	0	0	0	0	0	0	0	0	0	2	4	#NULL!	1	2
1	45	3	#NULL!	#NULL!	1	5	2	4	3	1	4	6	3	1	2	2	2	2	2	3	4	7	2	0	0	0	0	0	0	0	0	0	0	0	0	0	0	0	0	0	0	0	0	0	3	5	#NULL!	1	2
1	42	3	#NULL!	#NULL!	6	2	2	1	1	2	6	3	2	1	2	2	2	2	3	2	1	1	2	0	0	0	0	0	0	0	0	0	0	0	0	0	0	0	0	0	0	0	0	0	3	2	#NULL!	1	2
2	35	2	1	5	1	#NULL!	1	#NULL!	3	1	5	6	5	1	3	2	2	2	2	2	4	7	2	0	0	0	0	0	0	0	0	0	0	0	0	0	0	0	1	0	0	0	1	0	2	#NULL!	1	1	2
2	78	1	#NULL!	#NULL!	1	3	2	2	1	2	8	3	3	5	2	1	2	2	2	1	7	1	2	1	1	0	1	0	0	0	0	0	0	0	0	1	1	2	0	2	0	0	0	0	5	3	#NULL!	1	3
2	50	3	1	2	1	3	2	2	3	2	5	6	5	1	3	2	2	2	2	1	7	7	2	1	3	2	3	2	2	1	3	2	3	2	3	3	2	2	2	1	1	3	3	2	4	3	1	2	3
2	24	2	3	20	3	#NULL!	1	#NULL!	3	1	1	5	3	3	3	2	2	2	2	2	7	7	1	2	0	0	1	1	0	1	1	0	3	1	1	1	0	1	3	1	1	2	0	0	1	#NULL!	3	2	1
1	29	2	1	6	3	#NULL!	1	#NULL!	3	1	7	6	3	3	3	2	2	2	2	5	7	7	2	1	0	0	1	1	0	2	1	0	1	1	2	1	1	1	2	0	2	0	0	1	1	#NULL!	1	2	1
2	34	1	#NULL!	#NULL!	2	#NULL!	1	#NULL!	3	1	8	6	4	1	1	2	2	2	3	1	7	7	2	2	2	2	2	1	2	1	2	0	2	2	2	1	1	3	1	2	2	1	1	1	2	#NULL!	#NULL!	2	2
2	37	2	2	18	1	3	2	2	3	1	7	5	3	1	1	2	2	2	2	1	7	7	2	0	0	0	0	0	0	0	0	0	0	0	0	0	0	1	1	1	0	0	0	0	2	3	2	1	2
2	43	2	4	35	1	5	2	4	3	1	4	6	4	4	3	2	2	2	2	1	7	7	2	0	0	0	0	0	0	0	0	0	0	0	1	0	0	0	2	1	0	0	0	0	3	5	4	1	2
2	31	2	3	23	5	2	2	1	3	1	1	5	3	3	1	2	2	2	3	3	7	7	2	1	0	0	1	1	0	1	1	0	0	1	1	1	0	1	2	0	1	2	0	0	2	2	3	1	2
2	35	1	#NULL!	#NULL!	1	2	2	1	3	2	6	5	1	1	3	2	2	2	2	2	7	7	2	1	0	0	0	0	0	0	0	0	0	0	1	0	0	0	1	1	0	0	0	0	2	2	#NULL!	1	2
1	33	4	1	6	2	#NULL!	1	#NULL!	3	2	2	6	3	5	1	2	2	2	2	1	7	7	2	1	0	0	3	0	0	0	1	0	1	3	3	1	1	0	2	2	0	3	1	0	2	#NULL!	1	2	2
2	43	4	1	8	4	#NULL!	1	#NULL!	1	2	1	6	4	5	2	2	2	1	2	6	1	1	2	0	0	0	0	0	0	0	0	0	0	0	0	0	0	0	0	0	0	0	0	0	3	#NULL!	1	1	2
1	41	4	1	2	1	4	2	3	3	2	7	6	4	4	2	2	2	2	1	1	6	4	2	0	2	3	3	1	0	0	0	1	2	1	1	2	2	2	2	1	1	0	0	0	3	4	1	2	2
1	42	1	#NULL!	#NULL!	1	3	2	2	1	2	6	4	4	4	1	2	2	2	2	1	1	1	2	1	0	0	1	0	0	0	0	0	0	0	0	0	0	1	1	1	0	3	0	3	3	3	#NULL!	1	2
2	45	2	3	24	1	4	2	3	3	1	5	6	2	1	3	2	2	2	2	5	7	7	1	0	0	1	0	1	0	0	0	0	1	0	0	1	0	1	0	0	0	0	0	0	3	4	3	1	2
2	48	2	1	1	5	2	2	1	3	1	7	5	3	1	3	2	2	2	2	3	7	7	2	0	0	0	0	0	0	0	0	0	0	0	0	0	0	0	0	0	0	0	0	0	3	2	1	1	2
2	38	2	1	1	1	3	2	2	3	1	7	5	3	4	1	2	2	2	2	5	7	7	1	2	1	2	1	2	3	3	3	1	1	1	2	2	2	1	1	1	1	1	0	1	2	3	1	2	2
2	35	1	#NULL!	#NULL!	1	2	2	1	1	1	5	4	2	1	2	2	2	2	2	3	3	5	2	1	1	2	1	0	0	0	0	0	0	1	0	1	0	0	1	1	0	0	0	1	2	2	#NULL!	1	2
2	36	1	#NULL!	#NULL!	4	#NULL!	1	#NULL!	1	1	1	5	3	5	2	2	2	2	3	1	7	7	2	0	1	0	0	0	3	0	0	0	1	1	1	1	0	2	0	0	0	0	0	0	2	#NULL!	#NULL!	1	2
1	32	1	#NULL!	#NULL!	1	2	2	1	1	2	6	5	3	1	1	2	2	2	2	1	7	7	1	0	0	0	0	0	0	0	0	0	0	0	0	0	0	0	0	0	0	2	0	0	2	2	#NULL!	1	2
1	38	1	#NULL!	#NULL!	6	#NULL!	1	#NULL!	1	2	3	4	1	3	2	2	2	2	6	3	1	1	2	1	0	0	0	0	0	0	0	0	1	0	0	0	0	0	0	0	0	1	1	0	2	#NULL!	#NULL!	1	2
1	34	1	#NULL!	#NULL!	6	#NULL!	1	#NULL!	1	2	6	3	3	1	2	2	2	2	2	3	4	5	2	0	0	0	0	0	0	0	1	0	1	0	0	1	1	1	1	0	0	1	0	1	2	#NULL!	#NULL!	1	2
1	35	1	#NULL!	#NULL!	1	4	2	3	3	1	1	5	3	3	1	2	2	2	2	1	7	1	2	1	0	0	0	0	0	0	0	0	1	0	0	0	0	1	0	0	0	0	0	0	2	4	#NULL!	1	2
1	47	1	#NULL!	#NULL!	6	#NULL!	1	#NULL!	3	1	4	5	4	3	1	1	2	2	1	1	7	7	2	1	0	0	1	0	0	0	0	0	1	1	0	1	1	1	2	1	1	1	1	2	3	#NULL!	#NULL!	1	2
1	43	1	#NULL!	#NULL!	5	2	2	1	3	1	5	5	3	1	2	2	2	2	6	3	5	7	2	1	1	0	1	0	0	0	0	0	1	0	0	0	1	1	1	1	1	1	2	0	3	2	#NULL!	1	2
1	42	1	#NULL!	#NULL!	1	3	2	2	3	1	4	5	3	1	2	2	1	1	2	3	7	7	2	1	0	0	0	0	0	0	0	0	2	0	0	0	0	0	1	0	0	0	1	0	3	3	#NULL!	1	2
1	41	1	#NULL!	#NULL!	1	3	2	2	3	2	6	4	3	4	2	2	2	2	2	3	1	1	2	1	0	0	0	0	0	0	0	0	1	1	0	0	1	0	1	1	1	2	1	1	3	3	#NULL!	1	2
1	43	1	#NULL!	#NULL!	5	4	2	3	1	1	4	5	3	3	2	2	2	2	6	3	7	7	2	1	1	0	1	1	0	1	1	0	1	1	1	1	1	1	1	1	1	1	0	0	3	4	#NULL!	1	2
1	59	1	#NULL!	#NULL!	1	5	2	4	1	2	6	3	1	4	2	1	2	2	2	1	7	7	2	0	0	0	0	0	0	0	0	0	1	0	0	0	1	1	0	0	0	0	0	0	4	5	#NULL!	1	3
1	57	1	#NULL!	#NULL!	1	3	2	2	1	2	6	4	3	1	2	2	2	2	2	3	3	4	2	0	0	0	0	0	0	0	0	0	0	0	0	0	0	0	0	0	0	0	0	0	4	3	#NULL!	1	3
1	53	1	#NULL!	#NULL!	1	5	2	4	1	2	3	2	2	3	2	2	2	2	2	3	3	3	2	1	1	1	1	1	0	1	1	0	1	1	1	1	1	1	1	1	1	1	1	1	4	5	#NULL!	2	3
1	79	1	#NULL!	#NULL!	4	#NULL!	1	#NULL!	1	1	8	3	2	2	2	1	2	2	1	3	7	7	2	1	2	0	2	1	0	1	0	0	2	0	1	2	1	2	2	2	2	0	2	3	5	#NULL!	#NULL!	2	3
1	64	1	#NULL!	#NULL!	6	5	2	4	1	2	6	3	2	4	2	2	2	2	6	3	1	1	2	1	1	0	1	1	0	0	0	0	0	1	1	1	2	2	1	1	2	1	2	3	5	5	#NULL!	2	3
1	54	1	#NULL!	#NULL!	1	5	2	4	1	2	6	2	3	5	1	2	2	2	2	5	7	7	2	0	0	0	1	0	0	0	0	0	1	0	1	0	1	0	1	1	0	0	1	0	4	5	#NULL!	1	3
1	69	1	#NULL!	#NULL!	6	6	2	5	1	2	6	1	1	4	2	1	2	2	5	3	1	1	2	2	2	2	2	2	3	1	2	0	2	2	2	2	3	3	3	3	2	3	2	3	5	6	#NULL!	2	3
2	65	1	#NULL!	#NULL!	1	3	2	2	1	1	7	3	3	2	2	2	2	2	2	5	7	7	2	1	2	0	1	0	0	0	0	0	0	0	0	2	0	0	0	0	0	0	0	2	5	3	#NULL!	1	3
2	55	1	#NULL!	#NULL!	6	#NULL!	1	#NULL!	2	2	8	5	2	4	2	2	1	1	3	3	7	7	2	1	0	0	1	0	0	0	0	1	0	2	0	0	1	0	1	2	0	0	1	2	4	#NULL!	#NULL!	1	3
2	52	2	4	30	1	4	2	3	1	1	7	3	2	3	1	1	1	1	2	6	7	7	2	1	0	0	0	0	1	0	0	0	1	1	0	0	0	0	3	1	0	0	0	0	4	4	4	1	3
2	30	1	#NULL!	#NULL!	2	#NULL!	1	#NULL!	3	2	7	5	3	4	2	2	2	2	2	1	7	7	2	0	1	0	1	0	0	0	0	0	0	2	0	0	0	3	0	0	0	0	0	0	2	#NULL!	#NULL!	1	2
2	31	2	1	5	2	#NULL!	1	#NULL!	3	1	1	5	2	3	1	1	2	2	6	1	7	7	2	1	0	0	0	0	0	0	0	0	0	0	0	0	0	0	1	0	0	0	0	0	2	#NULL!	1	1	2
2	37	1	#NULL!	#NULL!	1	2	2	1	1	1	7	6	4	1	1	2	2	2	2	4	7	7	2	0	0	0	0	0	0	0	0	0	1	0	0	0	0	0	0	0	0	0	0	0	2	2	#NULL!	1	2
1	35	1	#NULL!	#NULL!	1	3	2	2	3	2	6	6	3	5	1	2	2	2	2	1	5	7	2	1	0	1	0	1	0	1	0	0	1	1	1	1	1	0	1	1	0	3	0	0	2	3	#NULL!	1	2
1	30	2	3	29	3	#NULL!	1	#NULL!	3	1	4	6	4	3	3	2	2	2	2	2	7	7	2	0	0	0	0	1	0	0	1	0	3	1	0	1	0	0	1	1	1	0	0	0	2	#NULL!	3	1	2
2	35	1	#NULL!	#NULL!	1	3	2	2	3	1	4	6	4	1	1	2	2	2	2	1	1	2	2	0	0	0	1	0	0	0	0	0	0	0	1	1	1	1	1	1	0	0	0	0	2	3	#NULL!	1	2
2	35	2	4	32	4	#NULL!	1	#NULL!	3	1	4	6	3	3	1	2	2	2	3	2	7	7	2	2	1	0	1	0	0	0	0	0	1	2	3	2	0	0	1	0	0	1	0	1	2	#NULL!	4	1	2
1	23	1	#NULL!	#NULL!	4	#NULL!	1	#NULL!	3	2	2	6	4	5	1	2	2	2	3	1	1	1	2	1	0	0	0	0	0	1	0	0	0	1	1	0	0	1	0	0	0	0	0	0	1	#NULL!	#NULL!	1	1
1	27	1	#NULL!	#NULL!	4	#NULL!	1	#NULL!	3	1	1	6	3	5	1	2	2	2	3	1	7	6	2	0	1	0	1	1	0	0	1	0	1	1	1	1	0	0	1	0	0	1	0	0	1	#NULL!	#NULL!	1	1
1	24	1	#NULL!	#NULL!	3	#NULL!	1	#NULL!	1	1	4	6	3	5	1	2	2	2	3	1	3	5	2	0	0	0	0	0	1	0	0	0	1	1	0	1	0	1	0	0	0	0	0	0	1	#NULL!	#NULL!	1	1
2	40	2	3	20	1	3	2	2	3	1	1	3	3	3	1	2	2	2	2	5	5	1	2	1	0	0	0	0	0	0	0	0	0	2	1	0	0	0	0	0	0	0	1	0	3	3	3	1	2
2	66	1	#NULL!	#NULL!	1	2	2	1	3	1	5	6	4	1	1	2	2	2	2	3	7	7	2	1	0	0	1	0	0	0	0	0	0	0	0	0	1	1	1	1	0	0	0	1	5	2	#NULL!	1	3
2	29	2	2	10	2	#NULL!	1	#NULL!	3	1	1	6	3	3	1	2	1	1	1	1	7	7	1	0	0	0	1	0	0	0	1	0	0	1	1	0	0	1	0	0	1	0	1	1	1	#NULL!	2	1	1
2	25	1	#NULL!	#NULL!	3	#NULL!	1	#NULL!	3	2	2	6	1	5	1	2	2	2	3	1	7	7	2	1	0	0	1	2	0	1	2	0	1	2	0	1	0	1	1	2	1	0	0	0	1	#NULL!	#NULL!	1	1
2	23	1	#NULL!	#NULL!	4	#NULL!	1	#NULL!	1	2	2	6	2	4	1	2	2	2	3	1	7	7	2	1	0	0	0	0	0	0	0	0	0	0	0	0	0	0	0	0	0	0	0	0	1	#NULL!	#NULL!	1	1
2	21	1	#NULL!	#NULL!	4	#NULL!	1	#NULL!	3	1	2	6	4	5	1	2	2	2	3	1	7	6	2	0	0	0	0	0	0	0	0	0	0	0	0	0	0	0	0	0	0	0	0	0	1	#NULL!	#NULL!	1	1
1	24	1	#NULL!	#NULL!	4	#NULL!	1	#NULL!	3	2	2	6	5	4	1	2	2	2	3	1	7	7	1	1	0	1	1	1	0	1	1	0	1	1	1	1	2	1	1	1	2	2	2	0	1	#NULL!	#NULL!	2	1
2	60	1	#NULL!	#NULL!	1	3	2	2	1	1	7	4	3	1	2	2	2	2	2	2	7	7	2	0	0	0	0	0	0	0	0	0	0	0	0	0	1	2	0	1	0	1	0	0	5	3	#NULL!	1	3
2	46	2	2	10	1	3	2	2	1	1	7	4	3	3	1	1	2	2	2	6	7	7	2	3	1	0	3	3	0	0	0	0	0	2	2	0	0	2	0	1	0	0	0	0	3	3	2	2	2
2	30	1	#NULL!	#NULL!	1	#NULL!	1	#NULL!	3	1	7	4	3	3	1	2	2	2	2	3	7	7	2	0	0	0	0	0	0	0	0	0	0	0	0	0	0	0	1	0	0	0	1	0	2	#NULL!	#NULL!	1	2
1	22	1	#NULL!	#NULL!	4	#NULL!	1	#NULL!	3	2	2	6	1	4	1	2	2	2	3	1	7	7	2	1	1	1	1	1	1	2	0	0	1	2	1	1	1	0	1	1	1	2	0	0	1	#NULL!	#NULL!	2	1
1	28	1	#NULL!	#NULL!	2	#NULL!	1	#NULL!	2	1	4	6	3	5	1	2	2	2	2	1	7	7	2	1	1	2	1	0	0	1	0	0	1	1	1	1	1	1	1	1	1	2	0	0	1	#NULL!	#NULL!	2	1
1	35	4	1	1	7	#NULL!	1	#NULL!	3	1	3	6	5	5	3	2	2	2	4	6	5	1	2	0	0	0	2	3	2	2	2	2	0	2	2	1	1	1	0	0	2	2	3	3	2	#NULL!	1	2	2
1	38	1	#NULL!	#NULL!	1	3	2	2	3	1	8	3	4	5	1	2	2	2	2	1	7	5	2	1	0	0	0	0	0	0	0	0	0	0	0	0	0	0	0	1	0	0	0	0	2	3	#NULL!	1	2
1	42	1	#NULL!	#NULL!	1	3	2	2	3	2	6	5	4	5	1	2	2	2	2	1	1	4	2	1	0	0	1	1	0	0	0	0	0	1	1	1	1	1	1	1	0	3	0	0	3	3	#NULL!	1	2
1	47	4	#NULL!	#NULL!	3	#NULL!	1	#NULL!	2	1	1	5	2	5	1	2	2	2	1	1	1	1	2	0	0	0	0	0	0	0	0	0	0	0	0	1	0	0	0	0	0	0	0	0	3	#NULL!	#NULL!	1	2
2	26	1	#NULL!	#NULL!	4	#NULL!	1	#NULL!	3	2	2	6	4	5	1	2	2	2	3	1	7	7	2	1	0	1	0	0	0	1	0	0	1	0	0	0	0	0	1	1	0	0	0	0	1	#NULL!	#NULL!	1	1
2	26	1	#NULL!	#NULL!	4	#NULL!	1	#NULL!	3	2	2	6	4	5	1	2	2	2	3	1	7	7	2	1	0	0	1	0	0	0	0	0	0	1	1	1	0	0	1	0	0	0	0	0	1	#NULL!	#NULL!	1	1
2	21	1	#NULL!	#NULL!	4	#NULL!	1	#NULL!	3	2	2	6	4	5	1	2	2	2	3	1	7	7	2	1	0	0	1	0	0	0	0	0	0	1	1	1	0	0	0	0	0	0	0	0	1	#NULL!	#NULL!	1	1
1	50	1	#NULL!	#NULL!	1	3	2	2	3	2	8	3	4	5	1	2	2	2	2	1	6	7	2	1	1	1	1	0	0	1	1	0	1	1	1	1	0	1	1	1	0	2	0	0	4	3	#NULL!	1	3
2	64	3	#NULL!	#NULL!	1	#NULL!	1	#NULL!	3	1	5	6	3	5	3	2	2	2	1	6	1	1	2	0	0	1	2	2	3	1	0	0	0	3	2	1	1	1	1	0	0	0	0	0	5	#NULL!	#NULL!	2	3
2	20	1	#NULL!	#NULL!	4	#NULL!	1	#NULL!	1	2	2	6	4	5	1	2	2	2	3	1	6	1	2	0	0	0	0	0	0	0	0	0	0	0	0	0	0	0	0	0	0	0	0	0	1	#NULL!	#NULL!	1	1
1	34	1	#NULL!	#NULL!	1	3	2	2	1	1	8	5	3	1	1	2	2	2	2	1	6	1	2	1	1	0	0	0	0	0	0	0	0	1	0	1	0	0	1	1	1	1	0	0	2	3	#NULL!	1	2
1	38	1	#NULL!	#NULL!	3	2	2	1	1	1	1	5	2	3	1	2	2	2	1	3	6	6	2	2	2	0	2	2	2	0	2	0	2	0	1	1	1	1	1	1	0	0	1	2	2	2	#NULL!	2	2
1	67	1	#NULL!	#NULL!	1	5	2	4	1	2	5	4	2	2	2	1	1	1	5	3	1	7	2	2	0	0	1	0	0	0	0	0	1	2	0	1	1	1	0	1	2	1	1	2	5	5	#NULL!	1	3
1	21	2	1	1	4	1	1	0	3	2	2	6	2	3	2	2	2	2	1	1	5	5	1	1	1	0	1	1	0	0	1	0	1	1	0	1	0	0	1	0	1	1	1	0	1	1	1	1	1
1	23	1	3	23	3	1	1	0	2	1	5	6	5	4	2	2	2	2	3	3	1	1	1	0	0	0	0	0	0	0	0	0	0	0	0	0	0	1	0	0	0	0	0	0	1	1	3	1	1
1	25	2	1	4	6	2	2	1	2	1	1	3	2	3	1	2	2	2	4	5	7	7	1	1	1	2	1	2	1	1	1	1	1	1	1	1	1	1	1	1	1	1	1	1	1	2	1	2	1
1	23	1	3	23	3	1	1	0	3	1	5	5	3	4	3	2	2	2	3	1	7	7	2	0	0	0	0	0	0	0	0	0	0	0	0	0	0	0	0	0	0	0	0	0	1	1	3	1	1
1	26	3	1	6	4	1	1	0	3	2	2	6	3	3	3	2	2	2	5	5	7	7	1	0	0	0	0	0	0	0	0	0	0	0	0	0	0	0	0	0	0	0	0	0	1	1	1	1	1
1	22	2	1	3	4	1	1	0	3	2	2	6	4	4	1	2	2	2	1	5	7	7	1	3	3	2	2	1	3	2	1	1	1	1	1	1	1	1	2	1	2	1	2	1	1	1	1	2	1
1	26	4	1	6	1	3	2	2	1	1	1	2	2	4	1	2	2	2	2	2	7	7	1	0	0	0	0	0	0	0	0	0	0	0	0	0	0	0	0	0	0	0	0	0	1	3	1	1	1
1	0	4	1	2	6	1	1	0	1	1	1	5	2	4	1	1	2	2	6	5	1	1	1	0	0	0	0	0	0	0	0	0	0	0	0	0	0	0	0	0	0	0	0	0	#NULL!	1	1	1	#NULL!
1	20	2	1	2	4	1	1	0	3	2	2	6	2	3	1	2	2	2	2	3	7	7	2	1	0	0	1	1	1	1	0	0	0	2	1	1	0	1	2	1	2	1	1	1	1	1	1	2	1
1	25	2	1	7	1	2	2	1	3	2	2	5	3	3	1	2	2	2	2	5	7	7	1	0	0	0	0	0	0	0	0	0	0	0	0	0	0	0	0	0	0	0	0	0	1	2	1	1	1
1	20	2	1	5	3	1	1	0	3	2	2	6	3	3	1	2	2	2	1	5	2	2	1	1	0	1	1	1	0	2	1	0	1	1	1	1	1	1	1	0	1	1	0	1	1	1	1	2	1
2	22	1	3	22	4	1	1	0	3	2	2	6	5	4	1	2	2	2	3	3	7	7	1	0	0	0	0	0	0	0	0	0	0	0	0	0	0	0	0	0	0	0	0	0	1	1	3	1	1
1	21	1	3	21	4	1	2	0	3	2	7	5	5	4	1	2	2	2	3	4	7	7	1	0	0	0	0	0	0	0	0	0	0	0	0	0	0	0	0	0	0	0	0	0	1	1	3	1	1
1	48	2	5	40	1	2	2	1	2	1	7	5	4	1	3	2	2	2	2	5	2	7	1	0	3	0	2	2	0	0	0	1	0	1	0	0	0	0	0	0	1	0	0	1	2	5	#NULL!	1	2
2	53	1	#NULL!	#NULL!	1	2	2	1	3	2	8	5	3	1	2	2	2	2	2	1	7	7	1	3	2	2	2	3	1	1	0	0	1	2	2	1	2	1	2	2	3	1	1	1	2	#NULL!	#NULL!	2	3
2	31	1	#NULL!	#NULL!	4	1	#NULL!	#NULL!	2	1	8	6	2	2	3	2	2	2	3	2	6	1	1	0	0	0	0	0	0	0	0	0	0	0	0	0	0	0	0	0	0	0	0	2	#NULL!	#NULL!	#NULL!	1	2
1	21	1	#NULL!	#NULL!	4	1	#NULL!	#NULL!	1	1	7	5	2	4	1	2	2	1	3	1	6	1	1	0	0	1	0	0	0	0	0	0	0	0	0	0	0	1	0	0	1	0	0	1	#NULL!	#NULL!	#NULL!	1	1
2	54	1	#NULL!	#NULL!	1	2	2	2	3	1	1	5	3	1	3	2	2	2	2	1	7	7	1	0	0	0	1	1	0	0	0	1	0	0	0	0	0	2	0	0	0	0	1	1	3	#NULL!	#NULL!	1	3
1	88	2	5	40	1	2	1	6	1	2	6	1	2	2	2	1	2	2	1	5	1	1	1	1	1	2	1	0	0	0	0	2	1	1	2	1	3	1	0	0	1	3	3	1	7	5	#NULL!	2	3
2	21	1	#NULL!	#NULL!	4	1	#NULL!	#NULL!	2	1	1	4	2	4	3	2	2	2	3	3	7	1	1	2	3	2	0	0	0	0	0	0	0	1	0	0	0	0	0	0	0	0	0	2	#NULL!	#NULL!	#NULL!	1	1
2	21	2	1	2	4	1	#NULL!	#NULL!	3	2	2	6	2	3	1	2	2	2	4	1	1	7	1	1	0	1	1	1	2	1	0	1	1	1	2	1	2	1	2	1	2	0	0	1	#NULL!	1	#NULL!	2	1
2	22	2	1	2	3	1	1	3	2	2	6	2	1	1	2	2	2	2	4	5	6	7	1	0	1	2	2	1	1	1	0	1	1	1	0	0	1	1	1	0	0	3	1	2	4	1	#NULL!	2	1
2	32	1	#NULL!	#NULL!	4	1	#NULL!	#NULL!	2	1	5	6	3	4	2	2	2	2	3	1	7	1	1	2	0	0	0	0	0	0	0	0	0	0	0	0	0	0	0	0	0	0	0	1	#NULL!	#NULL!	#NULL!	1	2
2	24	2	2	16	4	1	#NULL!	#NULL!	2	1	4	6	3	1	1	1	2	1	3	6	7	7	2	0	2	0	0	0	0	0	0	0	0	0	0	0	0	0	0	0	0	0	0	1	#NULL!	2	#NULL!	1	1
1	57	2	5	40	1	2	2	5	1	2	3	3	2	2	2	2	2	2	2	5	1	1	1	3	1	1	3	1	0	2	0	1	3	1	1	2	1	0	0	2	0	1	1	1	6	5	#NULL!	2	3
2	61	1	7	61	1	2	1	3	3	1	7	6	4	1	2	2	2	2	2	2	7	1	1	0	0	1	0	0	0	0	0	0	1	0	0	1	2	0	1	0	1	0	1	1	4	7	#NULL!	1	3
1	41	2	5	41	5	2	2	2	2	1	5	5	2	3	1	2	2	2	6	1	6	7	1	0	0	0	0	0	0	0	0	1	1	0	0	0	0	0	1	1	2	1	3	2	3	5	#NULL!	1	2
2	49	1	#NULL!	#NULL!	1	2	2	1	2	2	8	5	4	1	1	2	2	2	2	1	7	7	1	1	0	0	1	1	0	0	0	0	1	0	0	0	0	0	0	2	3	1	0	1	2	#NULL!	#NULL!	1	2
2	39	1	#NULL!	#NULL!	1	2	1	3	2	1	5	6	5	1	3	2	2	2	2	1	7	7	1	1	0	0	0	0	0	0	0	0	0	0	0	0	0	0	0	0	0	0	0	1	4	#NULL!	#NULL!	1	2
1	52	1	#NULL!	#NULL!	1	2	2	2	2	1	7	6	4	1	3	1	2	2	2	1	7	7	1	2	1	1	1	1	1	1	0	1	1	0	0	0	1	1	1	1	2	2	2	2	3	#NULL!	#NULL!	2	3
1	39	1	#NULL!	#NULL!	1	2	2	2	2	1	4	6	3	1	1	2	2	2	2	1	7	7	1	0	0	0	0	0	0	0	0	1	1	0	0	1	0	0	1	0	0	0	0	2	3	#NULL!	#NULL!	1	2
1	18	1	#NULL!	#NULL!	4	1	#NULL!	#NULL!	2	2	2	5	1	1	3	2	2	2	3	1	5	1	1	0	0	3	1	2	0	1	0	1	3	1	2	2	1	1	1	2	0	1	2	2	#NULL!	#NULL!	#NULL!	2	1
1	33	1	#NULL!	#NULL!	1	2	2	2	2	1	7	6	3	1	2	2	2	2	2	1	7	2	1	0	0	0	0	0	0	0	0	0	0	0	0	0	0	0	0	0	0	0	0	1	3	#NULL!	#NULL!	1	2
2	21	2	5	40	2	1	#NULL!	#NULL!	2	1	7	4	2	4	2	2	2	2	3	1	7	7	1	2	0	1	1	0	0	1	0	1	1	1	1	1	1	0	0	0	0	0	0	2	#NULL!	5	#NULL!	1	1
2	65	1	#NULL!	#NULL!	1	2	2	2	2	1	7	6	4	1	2	1	2	2	2	1	7	7	1	0	0	0	0	3	0	0	0	0	1	0	1	1	1	1	1	0	0	0	0	1	3	#NULL!	#NULL!	1	3
2	79	1	#NULL!	#NULL!	1	2	1	3	1	2	8	6	4	1	2	1	2	2	2	1	7	7	1	0	0	0	0	0	0	0	0	0	0	0	0	0	0	0	0	0	0	0	0	1	4	#NULL!	#NULL!	1	3
2	25	1	#NULL!	#NULL!	4	1	#NULL!	#NULL!	1	1	2	4	4	3	2	2	2	2	3	1	6	6	2	1	3	2	0	0	0	0	3	0	2	2	2	3	2	0	0	1	2	2	2	2	#NULL!	#NULL!	#NULL!	2	1
2	60	1	7	60	1	2	2	2	2	1	7	3	2	4	2	1	2	1	2	1	7	7	1	3	0	0	0	3	0	0	0	2	2	0	0	0	1	1	3	1	0	0	1	1	3	7	#NULL!	2	3
1	34	2	2	10	4	1	#NULL!	#NULL!	1	1	1	3	2	4	2	2	2	2	3	5	1	7	1	0	0	1	1	3	2	1	0	1	0	1	0	0	0	0	0	1	0	2	0	2	#NULL!	2	#NULL!	1	2
1	46	2	3	23	1	2	2	2	2	1	1	3	3	4	2	2	1	2	2	5	2	7	1	1	2	1	2	0	1	0	1	2	1	1	2	1	0	0	1	0	0	1	1	1	3	3	#NULL!	2	2
2	45	1	3	25	1	2	2	1	3	1	7	5	4	1	3	2	2	2	2	3	7	7	1	3	0	0	0	0	0	0	0	0	3	0	0	0	0	0	1	0	3	1	1	1	2	3	#NULL!	1	2
1	23	1	1	4	1	1	#NULL!	#NULL!	2	2	2	6	4	1	3	2	2	2	3	1	2	2	1	0	0	0	0	0	0	0	0	0	0	0	0	0	0	0	0	0	0	0	0	2	#NULL!	1	#NULL!	1	1
2	40	1	5	40	1	2	2	2	2	1	1	4	2	4	3	2	2	2	2	1	7	7	1	0	0	0	0	0	0	0	0	0	0	0	0	0	0	0	0	0	0	0	0	2	3	5	#NULL!	1	2
1	52	1	#NULL!	#NULL!	1	2	2	2	2	1	5	5	3	2	2	2	2	2	2	2	7	7	1	0	0	1	2	0	0	1	0	1	0	1	2	0	0	0	1	0	0	0	0	1	3	#NULL!	#NULL!	1	3
2	40	2	1	6	1	2	2	2	2	1	5	4	3	3	2	2	2	2	2	5	6	7	1	2	2	0	2	0	0	1	0	0	0	1	1	1	1	1	1	2	0	0	1	1	3	1	#NULL!	2	2
1	36	1	#NULL!	#NULL!	4	1	#NULL!	#NULL!	2	1	7	5	2	4	2	2	2	2	5	5	7	7	1	1	0	1	3	1	0	1	0	3	2	1	2	2	2	3	2	0	0	1	2	1	#NULL!	#NULL!	#NULL!	2	2
2	43	1	#NULL!	#NULL!	1	2	2	2	2	1	4	5	4	4	2	2	2	2	2	2	7	7	1	0	0	0	1	0	0	1	0	1	0	0	0	1	0	2	1	0	0	0	0	2	3	#NULL!	#NULL!	1	2
1	29	1	#NULL!	#NULL!	4	1	#NULL!	#NULL!	2	1	4	6	3	4	2	2	2	2	3	1	7	1	1	0	0	0	0	0	0	1	0	3	2	0	0	0	0	1	1	0	2	0	0	2	#NULL!	#NULL!	#NULL!	1	1
2	38	1	#NULL!	#NULL!	1	2	2	2	2	1	5	4	3	1	2	2	2	2	2	5	7	7	1	0	0	0	1	0	0	1	0	1	1	0	1	0	0	0	0	0	0	0	0	1	3	#NULL!	#NULL!	1	2
1	35	1	#NULL!	#NULL!	1	2	2	1	1	1	8	6	3	1	2	1	2	2	2	1	7	7	1	0	0	1	0	0	0	1	0	1	3	0	0	1	0	0	0	0	0	0	1	1	2	#NULL!	#NULL!	1	2
2	43	2	5	40	1	2	1	3	2	1	5	5	3	4	2	2	2	2	2	5	7	7	1	0	0	0	0	0	0	1	0	1	1	2	2	0	0	0	0	1	1	0	0	1	4	5	#NULL!	1	2
2	32	2	2	16	4	1	1	3	1	1	1	5	2	4	1	2	2	2	1	1	7	7	1	1	0	0	0	0	0	0	0	0	0	0	0	0	0	0	0	0	0	0	0	1	4	2	#NULL!	1	2
2	35	1	#NULL!	#NULL!	1	2	2	1	3	1	5	5	3	1	2	2	2	2	2	1	7	1	1	0	0	0	0	0	0	1	0	1	3	0	0	0	0	1	1	1	2	0	0	1	2	#NULL!	#NULL!	1	2
1	38	2	1	2	1	2	2	2	3	2	6	5	4	4	#NULL!	2	2	1	2	5	7	7	1	1	1	1	1	0	0	0	0	0	0	1	1	0	0	1	0	1	0	0	0	1	2	2	#NULL!	1	2
2	32	4	2	13	4	1	#NULL!	#NULL!	3	1	5	6	4	3	1	2	2	2	2	1	5	1	1	0	0	0	0	0	0	0	0	0	0	0	0	0	0	0	0	0	0	0	0	0	2	#NULL!	#NULL!	1	2
2	26	4	1	5	4	1	#NULL!	#NULL!	3	1	8	5	3	3	1	2	2	2	4	1	7	1	1	0	1	0	0	0	0	0	0	0	0	0	1	1	0	0	0	1	1	1	0	0	1	#NULL!	#NULL!	1	1
2	26	2	1	6	4	1	#NULL!	#NULL!	3	2	2	6	3	3	1	1	2	2	1	3	7	7	1	1	0	0	0	0	1	1	0	0	1	1	0	1	1	0	1	1	3	3	1	0	1	#NULL!	#NULL!	1	1
1	23	2	2	10	4	1	#NULL!	#NULL!	3	1	1	5	2	1	1	2	2	2	3	5	1	1	1	0	0	0	0	0	0	0	0	0	0	0	0	0	0	0	0	0	0	0	0	0	1	#NULL!	#NULL!	1	1
2	45	2	1	6	1	2	1	1	3	1	7	6	5	1	1	2	2	2	2	6	7	7	1	0	0	0	1	1	0	0	0	0	0	0	0	0	0	0	0	0	0	0	0	0	3	1	#NULL!	1	2
2	41	2	1	1	4	1	#NULL!	#NULL!	3	1	8	6	3	3	#NULL!	2	2	2	1	6	7	7	1	0	0	0	0	0	0	0	0	0	0	0	0	0	0	0	0	0	0	0	0	0	3	#NULL!	#NULL!	1	2
2	40	2	1	8	1	1	#NULL!	#NULL!	3	1	7	6	4	3	3	2	2	1	2	2	7	7	1	0	0	1	1	0	0	0	0	0	0	0	0	0	0	0	0	0	0	0	0	0	3	#NULL!	#NULL!	1	2
2	25	2	1	5	4	1	#NULL!	#NULL!	3	1	1	6	3	3	3	2	2	2	4	5	7	7	1	0	1	0	0	0	0	0	0	0	0	0	0	0	0	0	0	0	0	0	0	0	1	#NULL!	#NULL!	1	1
2	27	2	1	3	4	1	#NULL!	#NULL!	3	1	1	6	4	3	1	2	2	2	4	1	7	1	1	0	0	0	0	0	0	0	0	0	0	0	0	0	0	0	0	0	0	0	0	0	1	#NULL!	#NULL!	1	1
1	31	2	1	2	1	2	2	3	3	2	5	5	4	1	1	2	2	2	2	5	1	5	1	0	0	0	0	0	0	0	0	0	0	0	0	0	0	0	0	0	0	0	0	0	2	3	#NULL!	1	2
1	48	2	5	40	1	2	1	1	3	1	7	6	4	3	3	2	2	2	2	3	6	1	1	0	0	0	1	0	0	0	0	0	0	0	0	2	1	0	0	0	0	1	0	1	3	1	#NULL!	1	2
1	29	1	#NULL!	#NULL!	1	2	1	1	3	1	8	6	5	4	1	2	2	2	2	1	7	7	1	1	0	0	0	0	1	2	0	0	1	1	0	1	1	0	1	1	0	0	0	0	1	1	#NULL!	1	1
1	29	1	#NULL!	#NULL!	1	1	#NULL!	#NULL!	3	1	5	6	4	4	1	2	2	2	2	6	7	1	1	0	0	0	0	0	0	0	0	0	0	0	0	0	0	0	0	0	0	0	0	0	1	#NULL!	#NULL!	1	1
2	40	2	1	4	1	2	2	2	3	1	8	6	5	3	3	2	2	2	2	5	5	7	1	0	0	0	1	1	0	0	0	0	0	0	0	1	1	1	0	1	0	0	0	0	3	2	#NULL!	1	2
1	30	2	2	16	1	2	1	1	3	2	3	5	4	3	1	2	2	2	2	5	6	7	1	0	0	0	0	0	0	0	0	0	0	0	0	0	0	0	0	0	0	0	0	0	2	1	#NULL!	1	2
1	63	2	2	18	1	2	2	5	3	2	6	1	2	3	1	1	2	2	2	1	1	7	1	1	1	3	1	1	3	1	1	0	3	0	1	1	1	3	1	2	1	0	3	3	4	5	#NULL!	2	3
1	30	2	2	10	1	2	2	2	3	1	1	3	2	3	3	2	2	2	2	2	1	1	1	0	0	0	0	0	0	0	0	0	0	0	0	0	0	0	0	0	0	0	0	0	2	2	#NULL!	1	2
1	32	4	1	9	1	1	#NULL!	#NULL!	3	1	8	5	3	1	3	2	2	2	2	3	1	3	1	0	0	0	0	0	0	0	0	0	0	0	0	0	0	0	0	0	0	0	0	0	2	#NULL!	#NULL!	1	2
1	38	2	2	15	4	1	#NULL!	#NULL!	3	1	8	5	3	3	1	2	2	2	3	3	2	7	1	1	1	1	1	1	0	0	0	0	1	1	0	0	0	1	1	0	1	0	0	0	2	#NULL!	#NULL!	1	2
2	20	2	1	1	4	1	#NULL!	#NULL!	3	2	2	6	2	3	1	2	2	2	4	5	7	1	1	0	0	0	0	0	0	0	0	0	0	0	0	0	0	0	0	0	0	0	0	0	1	#NULL!	#NULL!	1	1
2	20	2	1	1	3	1	#NULL!	#NULL!	3	2	2	5	1	4	3	2	2	2	4	5	2	5	1	1	0	0	0	0	0	0	0	0	0	1	0	0	0	0	1	1	0	0	0	0	1	#NULL!	#NULL!	1	1
1	32	2	3	20	1	2	1	1	3	1	8	6	4	1	3	2	2	2	2	1	1	1	1	1	3	1	1	0	0	0	0	0	2	1	1	0	1	0	2	1	0	0	0	0	2	1	#NULL!	1	2
2	21	2	2	12	4	1	#NULL!	#NULL!	3	1	2	6	4	4	1	2	2	1	4	5	7	7	2	2	1	0	2	1	0	2	1	0	0	2	2	1	0	2	3	3	3	1	0	1	1	#NULL!	#NULL!	2	1
2	35	2	4	35	1	2	1	1	3	1	7	6	4	4	1	2	2	2	2	1	7	7	1	0	0	0	0	0	0	0	0	0	0	0	0	0	0	0	0	0	0	0	0	0	2	1	#NULL!	1	2
2	30	1	#NULL!	#NULL!	1	2	1	1	3	1	5	6	4	1	1	2	2	2	2	1	7	7	1	0	0	0	0	0	0	1	0	0	1	1	1	1	0	1	0	2	0	1	2	0	2	1	#NULL!	1	2
1	32	2	2	15	1	2	2	2	3	2	6	5	2	4	1	2	2	2	3	5	7	7	1	0	0	0	0	0	0	0	0	0	0	0	0	0	0	0	0	0	0	0	0	0	2	2	#NULL!	1	2
1	23	1	3	23	4	1	#NULL!	#NULL!	2	2	2	6	3	4	3	2	2	2	3	2	7	1	1	0	0	0	0	0	0	0	0	0	0	0	0	0	0	0	0	0	0	0	0	0	1	#NULL!	#NULL!	1	1
2	31	2	2	14	1	2	1	1	3	1	7	4	3	3	1	2	2	2	2	5	6	7	1	0	0	0	0	0	0	0	0	0	0	0	0	0	0	0	0	0	0	3	0	0	2	1	#NULL!	1	2
1	36	4	2	10	1	2	2	2	3	2	6	6	4	3	1	2	2	2	2	5	6	7	1	0	0	0	0	0	0	0	0	0	0	0	0	0	1	0	0	1	0	1	0	0	2	2	#NULL!	1	2
2	28	1	#NULL!	#NULL!	4	1	#NULL!	#NULL!	1	1	5	5	3	4	3	2	2	2	3	1	7	7	1	1	3	0	2	2	0	0	0	0	1	1	1	1	0	2	2	1	1	2	2	0	1	#NULL!	#NULL!	2	1
2	48	1	#NULL!	#NULL!	1	2	2	3	3	1	5	5	4	1	3	2	2	2	2	2	7	6	1	0	0	0	0	0	0	0	0	0	0	0	0	0	0	0	0	0	0	0	0	0	3	3	#NULL!	1	2
1	44	1	#NULL!	#NULL!	1	2	2	2	3	1	5	5	4	4	3	2	2	2	2	2	7	6	1	0	0	0	0	0	0	0	0	0	0	0	0	0	0	0	0	0	0	0	0	0	3	2	#NULL!	1	2
1	38	1	#NULL!	#NULL!	1	2	1	1	3	2	6	4	3	1	3	2	2	2	2	3	2	2	1	1	0	1	1	0	0	0	0	0	0	0	0	0	0	0	1	0	0	0	0	0	2	1	#NULL!	1	2
2	41	1	#NULL!	#NULL!	4	1	#NULL!	#NULL!	1	1	8	6	3	4	3	2	2	2	3	2	7	1	1	0	0	0	0	1	0	0	1	0	0	0	0	0	1	0	0	0	0	0	0	0	3	#NULL!	#NULL!	1	2
1	56	1	#NULL!	#NULL!	4	2	2	2	3	2	8	3	2	1	1	1	2	2	1	1	7	2	1	0	0	0	0	0	0	0	0	0	0	0	0	0	0	0	0	0	0	0	0	0	#NULL!	2	#NULL!	1	3
1	24	2	2	18	2	1	#NULL!	#NULL!	3	1	7	5	3	3	3	2	2	2	3	5	7	1	1	0	0	0	1	0	1	0	0	0	0	0	0	0	0	1	1	1	1	0	0	0	1	#NULL!	#NULL!	1	1
1	24	2	1	5	4	1	#NULL!	#NULL!	3	2	2	6	4	3	1	2	2	2	4	2	6	6	1	0	0	0	0	0	0	0	0	0	0	0	0	0	0	0	0	0	0	0	0	0	1	#NULL!	#NULL!	1	1
1	63	2	2	18	6	2	1	4	1	2	6	3	2	1	3	1	2	2	1	5	1	6	1	2	2	2	2	2	0	2	0	0	2	0	1	1	1	1	1	3	0	1	2	3	4	4	#NULL!	2	3
2	45	1	#NULL!	#NULL!	6	2	2	2	1	1	4	5	3	1	3	2	2	1	1	1	7	6	1	1	1	0	0	1	0	0	0	0	1	0	0	0	0	0	1	1	0	0	0	0	3	2	#NULL!	1	2
2	43	1	#NULL!	#NULL!	1	2	2	2	1	1	7	3	2	4	2	1	1	1	2	3	7	7	2	1	1	0	1	0	0	0	0	0	1	1	0	0	1	1	1	1	1	3	0	1	3	2	#NULL!	1	2
1	46	1	#NULL!	#NULL!	5	2	2	2	3	1	7	6	3	3	1	2	2	2	3	1	7	1	1	1	1	0	1	1	1	0	0	0	0	0	0	0	1	0	0	1	0	0	0	0	3	2	#NULL!	1	2
1	53	2	3	20	1	2	2	5	3	1	7	3	3	3	#NULL!	2	2	2	6	5	1	1	1	0	0	0	1	0	0	0	0	0	1	0	0	0	1	0	0	0	0	0	0	0	#NULL!	5	#NULL!	1	3
2	20	4	1	5	4	1	#NULL!	#NULL!	3	2	2	6	5	4	1	2	2	2	1	5	7	7	1	0	1	0	0	0	0	0	1	0	0	3	0	0	0	0	0	1	0	0	0	0	1	#NULL!	#NULL!	1	1
2	59	1	#NULL!	#NULL!	2	2	1	1	2	1	5	4	2	1	3	1	2	2	2	1	7	7	2	0	0	0	0	0	0	0	0	0	0	0	0	0	0	0	0	0	0	0	0	0	#NULL!	1	#NULL!	1	3
1	55	1	#NULL!	#NULL!	1	2	2	3	3	2	6	5	2	1	1	2	2	2	2	2	1	1	1	0	0	0	0	0	0	0	0	0	0	0	0	0	0	0	0	0	0	0	0	0	#NULL!	3	#NULL!	1	3
2	40	2	3	20	1	2	1	1	3	1	7	5	4	3	3	2	2	2	2	5	7	7	1	0	0	0	0	0	0	0	0	0	0	1	0	0	1	0	0	0	0	0	0	1	3	1	#NULL!	1	2
2	31	2	3	20	1	2	1	1	3	1	8	4	4	3	1	2	2	2	2	6	7	7	2	1	0	0	0	0	0	0	0	0	0	0	0	0	1	1	1	1	0	0	0	0	2	1	#NULL!	1	2
1	18	2	1	9	4	1	#NULL!	#NULL!	1	2	2	5	4	3	1	2	2	2	3	3	2	1	1	0	0	1	1	0	0	1	1	0	0	1	0	1	0	1	0	1	0	0	1	0	1	#NULL!	#NULL!	1	1
2	35	1	#NULL!	#NULL!	4	1	#NULL!	#NULL!	3	1	1	6	3	4	3	2	2	2	1	1	7	1	1	0	0	0	1	0	0	0	0	0	1	0	0	0	0	0	0	1	0	0	0	0	2	#NULL!	#NULL!	1	2
1	32	2	2	11	1	2	1	1	3	1	7	6	3	2	3	2	2	2	2	3	1	1	1	1	0	0	0	0	0	2	0	0	0	0	0	0	0	0	0	0	0	0	0	0	2	1	#NULL!	1	2
2	23	2	1	4	4	1	#NULL!	#NULL!	3	2	2	6	1	3	1	2	2	2	4	5	1	7	1	0	0	0	1	1	0	0	0	0	0	0	1	0	0	0	0	0	0	0	0	0	1	#NULL!	#NULL!	1	1
1	24	2	3	20	1	2	1	1	3	1	7	4	4	3	#NULL!	2	2	2	2	5	4	7	1	3	1	0	2	1	1	1	1	0	2	2	1	1	1	2	3	1	2	2	0	0	1	1	#NULL!	2	1
2	19	2	1	1	4	1	#NULL!	#NULL!	3	2	2	6	5	4	1	2	2	2	1	5	1	1	1	0	0	0	0	0	0	0	0	0	0	0	0	1	0	0	2	1	2	1	0	0	1	#NULL!	#NULL!	1	1
1	46	2	3	26	1	2	2	3	3	2	6	3	4	4	3	2	2	2	2	1	1	3	1	0	0	0	0	0	0	0	0	0	0	0	0	0	0	0	0	0	0	0	0	0	3	3	#NULL!	1	2
2	23	2	1	4	4	1	#NULL!	#NULL!	2	2	2	6	4	3	1	2	2	2	4	5	1	7	1	1	0	0	1	0	0	0	0	0	1	1	0	0	0	1	1	1	1	1	0	0	1	#NULL!	#NULL!	1	1
2	80	1	#NULL!	#NULL!	1	2	2	7	3	2	4	6	4	2	3	2	2	2	2	2	4	7	1	1	1	1	1	1	0	1	0	0	0	1	3	3	1	3	1	0	3	1	3	3	4	6	#NULL!	2	3
1	18	2	1	5	4	1	#NULL!	#NULL!	3	2	2	5	3	3	1	2	1	2	3	1	1	1	1	2	3	3	3	2	2	3	3	1	1	1	3	2	3	1	0	3	0	0	0	0	1	#NULL!	#NULL!	2	1
1	55	1	#NULL!	#NULL!	1	2	2	2	3	2	6	5	2	2	2	1	2	2	2	5	1	1	1	1	1	1	1	1	0	1	1	0	0	1	1	1	1	1	1	1	1	0	0	3	#NULL!	2	#NULL!	2	3
1	22	2	1	4	3	1	#NULL!	#NULL!	3	2	2	6	2	3	1	2	2	2	1	1	1	7	1	1	0	0	1	0	0	0	0	0	0	1	0	0	1	0	1	0	1	1	0	0	1	#NULL!	#NULL!	1	1
1	29	2	1	7	4	1	#NULL!	#NULL!	3	2	2	6	2	4	1	2	2	2	4	6	4	1	1	0	0	0	2	0	0	0	0	0	0	3	0	0	0	1	1	1	0	0	0	0	1	#NULL!	#NULL!	1	1
1	26	2	1	5	3	1	#NULL!	#NULL!	1	1	2	6	2	3	1	2	2	2	4	5	7	7	1	0	0	0	1	0	0	0	0	0	0	0	0	0	0	0	1	0	0	0	0	0	1	#NULL!	#NULL!	1	1
2	61	1	#NULL!	#NULL!	1	2	2	2	2	2	4	5	4	1	3	2	2	2	2	2	7	7	1	0	0	0	0	0	0	0	1	0	0	0	0	0	1	1	0	1	0	0	0	0	4	2	#NULL!	1	3
2	48	1	#NULL!	#NULL!	1	2	2	2	1	1	5	4	5	1	3	1	2	1	1	5	7	7	2	1	1	1	1	0	0	1	0	0	0	1	1	0	1	1	1	1	0	0	0	2	3	2	#NULL!	1	2
1	37	2	2	15	1	2	2	2	3	1	8	6	2	1	3	2	2	2	2	3	1	1	1	0	0	0	0	0	1	0	0	0	0	0	0	0	0	0	0	0	0	0	0	0	2	2	#NULL!	1	2
1	31	2	1	9	1	2	2	2	3	2	6	3	3	1	1	2	2	2	2	5	1	1	1	0	0	0	0	0	0	0	0	0	0	0	0	0	0	1	0	1	0	0	0	0	2	2	#NULL!	1	2
2	55	2	4	31	1	2	2	5	3	1	8	5	2	1	3	2	2	2	2	1	1	1	1	1	0	0	1	0	0	0	0	0	1	0	0	0	1	0	0	1	1	0	0	1	#NULL!	5	#NULL!	1	3
1	22	2	1	1	1	2	1	1	1	2	6	4	2	3	1	2	2	2	2	1	1	1	1	1	1	0	1	1	1	1	0	0	2	2	3	1	0	0	1	1	2	3	0	0	1	1	#NULL!	2	1
2	61	2	4	32	1	2	2	6	3	1	8	4	4	1	3	1	2	2	2	6	7	5	1	0	3	0	3	3	0	1	0	0	0	0	3	0	1	3	1	0	0	0	2	3	4	6	#NULL!	2	3
2	23	2	1	2	3	1	#NULL!	#NULL!	1	2	2	6	1	3	1	2	2	2	4	5	1	1	1	0	0	0	1	1	0	1	1	0	1	1	0	0	0	0	0	0	0	3	0	0	1	#NULL!	#NULL!	1	1
1	26	2	1	3	1	2	1	1	1	1	1	4	4	1	1	2	2	2	2	5	1	1	1	0	0	0	0	0	0	0	0	0	0	0	0	0	0	0	0	0	0	0	0	0	1	1	#NULL!	1	1
2	24	2	1	2	4	1	#NULL!	#NULL!	1	2	2	6	3	1	1	2	2	2	3	5	1	1	1	0	0	0	0	0	0	0	1	0	0	0	0	0	0	0	0	0	3	3	0	0	1	#NULL!	#NULL!	1	1
1	22	2	1	2	1	1	#NULL!	#NULL!	1	2	6	4	3	1	1	2	2	2	2	5	1	7	1	1	0	0	0	0	0	0	0	0	1	1	1	3	0	3	1	0	2	1	0	1	1	#NULL!	#NULL!	1	1
1	20	2	1	3	4	1	#NULL!	#NULL!	3	2	2	6	2	4	3	2	2	2	4	5	5	1	1	3	3	1	3	2	3	2	2	2	2	1	2	2	3	3	3	2	1	0	1	1	1	#NULL!	#NULL!	2	1
1	63	1	#NULL!	#NULL!	6	2	2	3	3	1	5	3	3	3	1	2	2	2	1	2	7	1	1	0	0	0	0	0	0	0	0	0	0	0	0	0	0	0	0	0	0	0	0	0	4	3	#NULL!	1	3
2	62	1	#NULL!	#NULL!	1	2	2	2	1	2	8	6	2	2	3	2	2	2	2	1	1	1	1	1	0	0	0	0	0	0	0	0	0	0	0	0	0	1	2	1	0	0	1	0	4	2	#NULL!	1	3
2	58	1	#NULL!	#NULL!	1	2	2	3	1	1	7	3	3	4	3	2	2	2	2	2	7	1	1	1	0	0	0	0	0	0	0	0	1	0	0	1	1	1	1	0	0	0	0	0	#NULL!	3	#NULL!	1	3
2	35	1	#NULL!	#NULL!	1	2	1	1	3	1	4	6	3	3	1	2	2	2	2	2	5	1	1	0	0	0	0	0	0	0	0	0	0	0	0	0	0	0	0	0	0	0	0	0	2	1	#NULL!	1	2
2	23	2	1	6	4	1	#NULL!	#NULL!	3	2	2	6	2	3	1	2	2	2	4	3	7	1	1	0	0	0	0	0	0	0	0	0	0	0	0	0	0	0	0	0	0	0	0	0	1	#NULL!	#NULL!	1	1
2	33	2	2	18	1	2	1	1	1	1	8	5	4	3	1	2	2	2	2	5	7	7	1	0	0	0	1	0	0	0	0	0	0	0	1	1	1	1	2	1	0	3	0	0	2	1	#NULL!	1	2
1	27	2	1	6	1	2	1	1	1	1	8	5	2	1	3	2	2	2	2	5	1	1	1	0	0	0	0	0	0	0	0	0	0	0	0	0	0	0	0	1	1	1	0	1	1	1	#NULL!	1	1
1	44	2	2	10	1	2	1	4	1	2	6	3	3	3	3	2	2	2	2	1	1	1	1	1	0	0	1	0	0	0	0	0	1	1	0	0	1	2	1	1	0	0	0	0	3	4	#NULL!	1	2
1	31	2	1	8	1	2	1	1	3	1	4	6	4	1	3	2	2	2	2	3	4	1	1	0	0	0	1	0	0	0	0	0	0	0	0	0	0	0	1	1	0	0	0	0	2	1	#NULL!	1	2
2	46	2	5	40	1	2	1	1	3	1	4	6	4	1	1	2	2	2	2	2	5	1	1	0	0	0	0	1	0	0	0	0	0	0	0	0	0	0	0	1	0	1	0	0	3	1	#NULL!	1	2
1	25	1	#NULL!	#NULL!	4	1	#NULL!	#NULL!	3	1	1	4	3	4	1	2	2	2	3	1	7	7	1	0	0	0	0	0	0	0	0	0	0	0	0	0	0	0	0	0	0	0	0	0	1	#NULL!	#NULL!	1	1
2	35	1	#NULL!	#NULL!	1	2	2	2	1	1	7	6	3	1	3	2	2	2	2	1	7	1	1	0	0	0	0	0	0	0	0	0	0	0	0	0	0	0	0	0	0	0	0	0	2	2	#NULL!	1	2
2	66	1	#NULL!	#NULL!	1	2	1	4	3	2	4	5	4	1	3	1	1	1	2	2	7	7	1	1	0	0	2	0	0	0	0	0	0	1	0	0	1	3	3	1	0	0	2	0	4	4	#NULL!	1	3
1	24	1	#NULL!	#NULL!	1	2	1	1	3	1	1	6	2	3	1	2	2	2	2	6	7	7	1	0	0	0	0	1	0	0	0	0	1	3	0	1	1	1	1	0	1	1	0	0	1	1	#NULL!	1	1
2	50	2	1	9	1	1	#NULL!	#NULL!	3	1	1	4	3	3	1	2	2	1	2	5	6	7	1	0	0	0	1	1	2	1	0	0	3	1	3	0	0	0	1	1	1	1	0	2	#NULL!	#NULL!	#NULL!	2	3
2	33	2	4	32	1	2	1	1	1	1	4	6	4	4	3	2	2	2	2	1	7	1	1	1	0	0	0	0	0	0	0	0	0	0	0	0	1	2	0	1	0	0	0	0	2	1	#NULL!	1	2
2	50	1	#NULL!	#NULL!	1	2	2	2	1	1	5	5	4	1	3	1	2	2	2	1	7	7	1	0	0	0	0	0	0	0	0	0	0	0	0	1	1	2	1	1	0	0	2	0	#NULL!	2	#NULL!	1	3
2	25	2	1	5	4	1	#NULL!	#NULL!	3	2	2	6	2	3	#NULL!	2	2	2	4	5	7	7	2	0	0	0	1	0	0	0	0	0	0	0	0	0	0	0	0	0	0	0	0	0	1	#NULL!	#NULL!	1	1
1	23	2	1	5	4	1	#NULL!	#NULL!	3	2	2	6	2	3	1	2	2	2	2	5	2	3	1	1	0	0	1	1	0	0	0	0	1	1	1	1	1	1	1	0	2	1	0	0	1	#NULL!	#NULL!	1	1
1	35	2	1	3	6	2	1	1	1	2	3	6	3	4	1	2	2	2	6	5	7	7	1	1	0	1	1	1	0	0	0	0	1	1	1	1	1	1	1	1	2	3	0	0	2	1	#NULL!	2	2
2	42	1	#NULL!	#NULL!	1	2	#NULL!	#NULL!	3	1	1	5	2	4	1	2	2	1	2	1	7	7	1	0	0	0	0	0	0	0	0	0	1	0	0	0	0	0	0	1	0	0	0	0	3	#NULL!	#NULL!	1	2
1	48	2	#NULL!	#NULL!	2	1	#NULL!	#NULL!	3	1	8	6	4	1	1	2	2	2	3	1	3	4	1	1	1	1	2	2	1	1	1	1	2	3	2	2	1	2	2	2	2	2	2	1	3	#NULL!	#NULL!	2	2
1	42	2	1	7	1	2	2	3	3	1	4	6	4	1	1	2	2	2	2	5	7	7	1	0	0	0	1	0	0	0	0	0	1	1	0	0	1	1	1	1	1	0	1	0	3	3	#NULL!	1	2
1	41	1	1	2	1	1	#NULL!	#NULL!	3	2	4	2	5	1	1	2	2	2	2	5	1	1	1	1	2	2	3	2	1	2	2	1	1	3	2	2	3	1	2	2	1	1	2	3	3	#NULL!	#NULL!	2	2
1	23	2	1	1	4	1	#NULL!	#NULL!	3	2	2	6	3	1	1	1	2	2	1	5	1	7	1	0	2	3	1	3	1	1	1	2	2	1	3	3	2	2	3	2	2	1	0	3	1	#NULL!	#NULL!	2	1
1	42	1	3	22	1	2	2	3	3	1	4	6	3	1	2	2	2	2	2	3	7	7	1	1	2	1	1	2	1	2	1	2	2	1	1	0	3	2	1	1	1	0	3	1	3	3	#NULL!	2	2
1	22	2	1	1	4	1	#NULL!	#NULL!	3	2	2	6	4	1	1	2	2	2	3	5	1	2	1	0	0	0	0	0	0	0	0	0	0	0	0	0	0	0	0	0	1	3	0	0	1	#NULL!	#NULL!	1	1
1	42	1	#NULL!	#NULL!	1	2	2	3	1	1	7	3	3	1	3	2	2	2	2	5	6	7	1	0	0	0	0	0	0	0	0	0	0	0	0	0	0	0	0	0	0	0	0	0	3	3	#NULL!	1	2
2	45	2	2	15	4	1	#NULL!	#NULL!	3	1	1	6	4	3	1	2	1	1	2	5	7	7	1	0	0	0	1	1	1	1	0	1	0	1	1	1	1	1	1	0	1	2	1	1	3	#NULL!	#NULL!	1	2
2	35	1	#NULL!	#NULL!	1	2	2	2	1	1	5	5	3	4	1	2	2	2	2	1	6	7	1	1	1	0	1	1	0	0	1	0	1	0	0	1	1	1	1	1	2	1	0	0	2	2	#NULL!	1	2
1	45	2	1	5	1	1	#NULL!	#NULL!	3	2	6	5	2	4	1	2	2	2	2	5	5	1	1	1	2	1	1	1	0	0	0	0	0	1	1	1	1	1	1	1	1	1	1	1	3	#NULL!	#NULL!	2	2
1	35	2	2	19	4	1	#NULL!	#NULL!	3	1	5	6	4	1	1	2	2	2	2	3	7	1	1	1	0	0	1	1	0	0	1	0	2	1	1	1	0	1	1	1	1	0	0	0	2	#NULL!	#NULL!	1	2
1	37	2	2	12	4	1	#NULL!	#NULL!	1	1	4	6	3	3	1	2	2	2	1	4	7	3	1	1	2	0	2	3	2	2	1	1	2	2	1	1	3	2	1	3	1	0	2	0	2	#NULL!	#NULL!	2	2
1	42	2	1	4	1	1	#NULL!	#NULL!	3	1	4	6	3	1	2	2	2	2	1	3	4	7	1	2	1	1	0	3	2	3	1	1	1	1	2	2	1	3	3	2	0	1	1	1	3	#NULL!	#NULL!	2	2
1	20	2	1	1	3	1	#NULL!	#NULL!	3	1	1	6	3	3	1	2	2	2	3	5	2	7	1	0	3	0	3	0	0	1	0	0	0	1	0	0	0	0	2	0	0	0	0	0	1	#NULL!	#NULL!	1	1
1	28	4	1	1	3	1	#NULL!	#NULL!	2	2	2	6	4	4	#NULL!	2	2	2	1	2	7	7	1	0	0	0	0	0	2	0	1	0	1	0	1	0	1	1	1	0	2	2	0	1	1	#NULL!	#NULL!	1	1
1	29	4	1	1	4	1	#NULL!	#NULL!	3	1	8	6	4	4	1	2	2	2	3	5	3	1	1	0	0	0	0	0	0	0	0	0	0	0	0	0	0	0	0	0	0	0	0	0	1	#NULL!	#NULL!	1	1
1	22	2	1	1	4	1	#NULL!	#NULL!	3	2	2	6	3	4	1	2	2	2	3	5	1	2	1	0	0	0	1	0	0	2	1	0	1	3	1	1	0	1	0	1	3	2	0	0	1	#NULL!	#NULL!	2	1
1	21	2	1	5	2	1	#NULL!	#NULL!	2	2	3	6	1	4	1	2	2	2	2	3	2	4	1	0	1	1	0	1	0	2	1	0	2	1	0	1	0	1	0	2	1	0	1	0	1	#NULL!	#NULL!	1	1
1	41	2	1	3	4	1	#NULL!	#NULL!	3	2	2	5	1	3	1	1	1	2	1	5	1	2	1	1	2	1	3	1	1	1	0	1	0	0	0	1	3	2	0	1	0	0	0	0	3	#NULL!	#NULL!	2	2
1	39	2	#NULL!	#NULL!	4	1	#NULL!	#NULL!	3	2	2	6	3	4	1	2	2	2	3	5	1	7	1	0	0	0	0	0	0	0	0	0	0	0	0	0	0	0	0	0	0	0	0	0	2	#NULL!	#NULL!	1	2
1	30	2	1	2	3	1	#NULL!	#NULL!	3	1	5	2	4	4	1	2	2	2	3	5	1	1	1	0	0	0	0	0	0	0	0	0	0	0	0	0	0	0	0	0	0	0	0	0	2	#NULL!	#NULL!	1	2
1	33	2	#NULL!	#NULL!	4	1	#NULL!	#NULL!	3	2	2	6	3	1	1	2	2	2	3	5	7	7	1	1	0	0	1	1	0	0	2	1	1	0	0	1	0	0	1	1	0	0	0	0	2	#NULL!	#NULL!	1	2
1	45	2	1	1	5	2	2	3	1	2	6	3	2	2	2	2	2	2	6	1	1	7	1	3	3	2	3	3	1	2	2	3	2	2	0	3	3	3	1	3	3	2	0	3	3	3	#NULL!	2	2
1	48	2	5	41	1	2	#NULL!	#NULL!	1	1	1	5	2	1	2	2	2	2	2	5	6	7	1	1	1	1	1	1	1	2	1	1	1	1	1	1	1	1	1	2	1	1	1	1	3	#NULL!	#NULL!	2	2
1	36	2	1	1	4	1	#NULL!	#NULL!	1	2	4	6	3	2	1	2	2	2	3	5	1	1	1	1	2	1	3	1	1	2	0	3	3	1	1	3	1	2	2	1	2	2	1	2	2	#NULL!	#NULL!	2	2
1	45	2	1	4	1	2	1	4	1	2	6	2	3	2	1	2	2	2	2	5	3	2	1	0	1	2	3	2	3	2	3	2	0	0	2	2	3	2	1	0	3	1	3	1	3	4	#NULL!	2	2
1	39	2	1	9	1	2	2	5	3	2	6	4	3	4	1	2	2	2	2	6	1	1	1	0	0	0	0	0	0	0	0	0	0	0	0	0	0	0	0	0	0	0	0	0	2	5	#NULL!	1	2
1	23	2	1	4	4	1	#NULL!	#NULL!	3	2	2	6	5	1	1	2	2	2	1	6	7	1	1	0	0	0	0	1	0	0	1	0	0	0	0	0	0	0	0	0	0	0	0	0	1	#NULL!	#NULL!	1	1
1	46	2	1	3	1	2	2	2	3	1	5	5	3	1	1	2	2	2	2	5	5	3	1	0	1	0	1	0	0	1	1	0	0	3	0	1	0	1	2	1	0	0	1	1	3	2	#NULL!	1	2
1	47	2	1	2	1	2	2	2	3	1	7	4	#NULL!	1	1	2	2	2	6	2	2	2	1	1	1	2	2	1	1	2	1	0	2	1	2	2	1	3	2	2	3	1	1	0	3	2	#NULL!	2	2
1	22	2	#NULL!	#NULL!	4	1	#NULL!	#NULL!	3	2	2	6	1	4	1	2	2	1	3	3	3	2	1	3	1	1	2	1	3	3	3	1	1	3	2	3	1	1	1	1	1	3	3	3	1	#NULL!	#NULL!	2	1
1	35	2	1	7	1	2	2	2	3	1	8	6	4	4	1	2	2	2	2	3	7	1	1	1	0	0	1	1	1	1	1	0	1	1	0	1	0	1	0	0	0	0	0	0	2	2	#NULL!	1	2
1	43	1	#NULL!	#NULL!	1	2	2	2	2	1	1	5	2	3	1	1	2	2	1	1	7	2	1	0	0	0	0	0	0	0	0	0	0	0	0	0	0	0	0	0	0	0	0	0	3	2	#NULL!	1	2
2	54	2	2	16	1	2	2	3	3	1	7	5	4	4	1	2	2	2	2	5	7	7	1	0	0	0	0	1	0	0	0	0	0	0	0	0	0	1	1	1	0	0	1	0	#NULL!	3	#NULL!	1	3
1	30	2	1	2	4	1	#NULL!	#NULL!	3	2	2	6	3	4	1	2	2	2	3	6	1	1	1	0	0	0	0	0	0	0	0	0	0	0	0	0	0	0	0	0	0	0	0	0	2	#NULL!	#NULL!	1	2
1	21	2	1	4	4	1	#NULL!	#NULL!	3	2	2	6	1	4	1	2	2	2	6	3	1	5	1	0	0	0	0	0	0	0	0	0	0	0	0	0	0	0	0	0	0	0	0	0	1	#NULL!	#NULL!	1	1
1	50	2	3	28	1	2	2	3	3	2	6	2	4	1	1	1	2	2	2	5	1	1	1	0	0	0	1	0	0	0	1	0	1	1	1	1	0	0	0	0	0	0	0	0	#NULL!	3	#NULL!	1	3
2	45	2	1	5	2	1	#NULL!	#NULL!	3	1	5	6	4	4	1	2	2	2	1	3	7	6	2	1	3	2	1	1	3	2	2	1	1	1	2	2	0	2	1	2	1	0	0	0	3	#NULL!	#NULL!	2	2
2	23	2	1	4	3	1	#NULL!	#NULL!	3	1	1	4	4	3	1	2	2	2	1	5	7	5	1	0	0	0	0	0	0	0	0	0	0	0	0	0	0	0	0	0	0	0	0	0	1	#NULL!	#NULL!	1	1
2	40	2	2	14	1	2	2	2	3	1	5	6	4	4	1	2	2	2	2	5	5	5	1	0	0	1	1	0	0	0	0	0	0	0	0	0	0	1	0	0	0	0	0	0	3	2	#NULL!	1	2
2	63	2	6	50	6	2	2	2	1	2	5	4	4	1	1	2	2	2	1	5	6	7	1	0	0	0	0	1	1	2	0	0	0	1	1	1	0	0	3	1	0	0	1	0	4	2	#NULL!	1	3
1	30	1	1	4	4	1	#NULL!	#NULL!	3	2	2	6	4	4	1	2	2	2	3	6	7	1	1	3	1	0	2	1	3	1	1	0	1	1	0	1	0	1	0	2	0	0	0	0	2	#NULL!	#NULL!	2	2
1	35	2	1	1	1	2	2	2	3	1	5	6	3	3	1	2	2	2	2	3	1	1	1	0	0	0	1	2	0	2	1	0	1	2	0	0	0	0	0	1	0	0	0	0	2	2	#NULL!	1	2
2	32	2	1	5	4	1	#NULL!	#NULL!	3	1	8	6	2	3	1	2	2	2	4	5	7	1	1	2	3	0	1	0	0	2	2	0	0	1	1	1	1	2	0	2	0	0	2	0	2	#NULL!	#NULL!	2	2
1	23	2	1	4	3	1	#NULL!	#NULL!	3	2	2	6	1	1	1	2	2	2	2	3	6	7	1	0	1	1	1	1	1	1	1	0	1	1	0	0	0	0	0	0	1	1	0	0	1	#NULL!	#NULL!	1	1
1	23	2	1	4	4	1	#NULL!	#NULL!	3	2	2	6	1	4	1	1	2	2	4	6	1	1	1	1	1	1	1	0	0	1	1	0	1	3	1	1	0	1	1	2	1	0	1	0	1	#NULL!	#NULL!	2	1
1	20	2	1	2	3	1	#NULL!	#NULL!	1	2	2	6	1	1	1	2	2	2	4	6	2	5	1	3	2	2	2	2	3	1	2	1	2	2	1	0	1	2	1	0	1	1	2	0	1	#NULL!	#NULL!	2	1
2	19	2	1	2	4	1	#NULL!	#NULL!	3	2	2	6	2	3	1	2	2	2	4	1	5	7	1	0	1	0	1	0	0	0	1	0	1	1	1	1	0	0	0	0	0	0	0	0	1	#NULL!	#NULL!	1	1
2	50	2	2	11	1	2	1	1	3	1	8	4	3	3	1	2	2	2	1	5	7	7	1	0	2	0	1	0	0	0	0	0	0	1	0	1	0	0	0	1	1	1	0	1	#NULL!	1	#NULL!	1	3
2	62	2	2	19	1	2	1	1	3	2	8	6	5	1	3	2	1	1	1	4	7	7	1	1	0	0	1	1	3	3	1	0	3	0	0	1	1	3	1	2	1	0	2	0	4	1	#NULL!	2	3
1	65	1	7	65	1	2	2	3	3	2	6	6	3	1	3	2	2	2	2	3	7	7	1	0	2	0	0	0	0	0	1	0	1	3	0	0	0	0	0	0	0	0	1	0	4	3	#NULL!	1	3
2	31	2	1	4	7	1	#NULL!	#NULL!	3	2	2	6	4	4	1	2	2	2	3	5	7	1	1	1	2	2	2	3	2	1	1	1	2	3	2	2	2	2	2	3	3	0	1	0	2	#NULL!	#NULL!	2	2
2	22	2	1	4	3	1	#NULL!	#NULL!	3	2	2	6	3	1	1	2	2	2	4	2	1	1	2	1	3	2	3	3	2	2	1	3	1	0	1	1	3	3	2	2	1	0	1	3	1	#NULL!	#NULL!	2	1
2	23	2	1	4	4	1	#NULL!	#NULL!	3	2	2	6	3	1	1	2	2	2	1	4	7	7	1	1	0	1	0	1	1	1	1	0	1	1	1	0	1	1	0	1	0	0	0	0	1	#NULL!	#NULL!	1	1
2	37	1	4	37	1	2	1	1	3	1	5	6	4	4	3	2	2	2	2	1	7	1	1	1	0	0	1	1	0	1	1	0	1	1	1	1	0	1	0	0	0	0	0	1	2	1	#NULL!	1	2
2	22	2	1	3	3	1	#NULL!	#NULL!	3	2	2	6	2	1	1	2	2	2	4	1	6	6	1	0	0	0	0	0	0	0	0	0	0	0	0	0	0	0	0	0	0	0	0	0	1	#NULL!	#NULL!	1	1
2	40	2	3	20	1	2	2	2	3	1	7	6	3	4	1	2	2	2	2	5	7	7	1	0	0	0	0	0	0	0	0	0	0	0	0	0	0	0	0	0	0	0	0	0	3	2	#NULL!	1	2
2	42	1	5	42	1	2	2	2	3	1	7	6	3	2	1	2	2	1	2	2	3	1	2	1	1	0	1	0	1	1	0	0	1	1	1	1	1	1	1	1	1	1	0	2	3	2	#NULL!	2	2
1	45	2	2	10	1	2	2	2	3	1	4	6	3	3	1	2	2	2	2	5	7	7	1	0	0	0	0	0	0	0	0	0	0	0	0	0	0	0	0	0	0	0	0	0	3	2	#NULL!	1	2
2	55	2	4	32	1	2	2	3	3	1	5	6	3	1	1	2	2	2	2	3	1	7	1	0	0	0	3	0	0	0	0	0	0	0	0	0	0	0	0	0	0	0	0	0	#NULL!	3	#NULL!	1	3
2	66	1	7	66	1	2	1	4	1	2	8	3	3	1	1	2	2	2	2	5	6	5	1	1	2	1	2	1	0	0	1	0	1	1	0	1	2	1	2	1	2	3	1	2	4	4	#NULL!	2	3
2	41	2	1	2	3	1	#NULL!	#NULL!	3	1	1	5	3	4	1	2	2	2	1	5	7	7	1	0	0	0	0	0	0	0	0	0	0	0	0	0	0	0	0	0	0	0	0	0	3	#NULL!	#NULL!	1	2
1	42	2	1	5	2	1	#NULL!	#NULL!	3	1	4	6	4	1	1	2	2	2	1	3	5	7	1	0	0	0	0	0	0	0	0	0	0	0	0	0	0	0	0	0	0	0	0	0	3	#NULL!	#NULL!	1	2
1	50	1	6	50	1	2	1	4	3	2	6	5	4	1	1	2	2	2	2	6	7	6	1	1	2	2	3	2	3	1	2	0	1	2	1	1	0	1	1	2	0	3	0	1	#NULL!	4	#NULL!	2	3
2	59	1	6	59	1	2	1	4	2	2	8	3	4	1	2	2	2	2	2	3	5	5	1	0	0	0	0	0	0	0	0	0	0	0	0	0	0	0	0	0	0	0	0	0	#NULL!	4	#NULL!	1	3
1	52	2	2	15	4	1	#NULL!	#NULL!	3	1	2	5	3	1	1	2	2	2	1	1	6	7	1	0	1	0	0	1	0	1	2	0	0	1	0	1	1	1	2	1	1	1	2	3	#NULL!	#NULL!	#NULL!	2	3
1	33	1	4	33	1	2	2	2	1	2	8	6	2	4	2	2	2	2	2	1	1	1	1	0	0	1	0	0	0	1	0	0	0	0	0	0	0	2	1	1	0	1	0	1	2	2	#NULL!	1	2
2	46	1	5	46	1	2	2	2	3	1	5	6	3	1	2	2	2	2	2	1	3	7	1	0	0	0	1	0	0	1	1	0	0	1	0	1	1	1	2	1	1	3	1	2	3	2	#NULL!	2	2
2	45	4	5	40	1	2	1	4	3	2	8	3	3	4	2	2	2	2	2	1	4	6	1	0	1	0	1	0	0	0	0	0	0	0	0	0	0	0	1	1	0	1	0	1	3	4	#NULL!	1	2
1	43	4	2	18	1	2	2	2	3	1	8	5	2	3	1	2	2	2	2	1	4	7	1	0	1	0	0	0	1	0	0	0	0	0	0	0	1	0	0	0	1	0	1	1	3	2	#NULL!	1	2
1	48	2	3	25	1	2	2	2	1	1	5	4	2	1	1	2	2	2	2	1	1	6	1	0	3	1	1	0	0	0	1	0	1	1	1	1	1	1	2	1	1	2	0	1	3	2	#NULL!	2	2
2	35	1	4	35	1	1	#NULL!	#NULL!	1	1	5	4	3	4	1	2	2	2	2	1	1	1	1	0	0	0	0	0	0	1	1	0	1	1	0	1	0	0	1	1	0	2	1	0	2	#NULL!	#NULL!	1	2
2	26	1	3	26	4	1	#NULL!	#NULL!	2	1	7	4	1	3	1	2	2	2	4	1	4	7	1	0	0	0	0	0	0	1	1	0	0	0	0	0	0	0	3	0	2	1	0	0	1	#NULL!	#NULL!	1	1
2	48	4	2	15	5	2	2	2	3	1	1	4	4	1	2	2	2	2	1	5	7	7	1	0	2	0	0	0	0	2	0	0	0	1	0	1	0	2	3	1	1	1	2	3	3	2	#NULL!	2	2
2	65	1	7	65	1	2	1	1	1	2	8	3	3	1	1	2	2	2	2	1	6	7	1	0	0	0	1	0	0	0	1	0	1	1	0	0	0	1	1	1	0	1	0	2	4	1	#NULL!	1	3
2	60	1	7	60	4	1	#NULL!	#NULL!	1	2	8	6	3	1	2	2	2	2	1	1	4	7	1	0	1	1	0	0	0	1	1	0	0	1	0	1	1	1	1	1	1	2	1	3	4	#NULL!	#NULL!	2	3
1	27	1	3	27	1	2	1	1	3	1	5	6	3	1	1	2	2	2	2	1	6	6	1	0	2	0	0	0	0	0	0	0	0	0	0	0	0	0	0	0	2	2	0	0	1	1	#NULL!	1	1
1	20	2	2	17	4	1	#NULL!	#NULL!	3	1	8	5	1	3	1	2	2	2	3	1	1	1	1	0	0	0	0	0	0	0	0	0	0	0	0	0	0	0	0	0	0	0	0	0	1	#NULL!	#NULL!	1	1
1	27	2	1	4	6	1	#NULL!	#NULL!	3	1	5	3	2	3	1	2	2	2	1	1	1	1	1	1	0	1	0	1	0	1	1	0	0	1	0	1	0	0	2	0	2	1	0	0	1	#NULL!	#NULL!	1	1
2	21	2	1	8	4	1	#NULL!	#NULL!	1	1	1	5	1	3	1	2	2	2	4	1	5	5	1	0	0	1	1	0	0	1	1	0	1	2	1	1	0	1	1	0	0	0	0	0	1	#NULL!	#NULL!	1	1
2	57	4	1	6	1	2	1	1	3	1	8	5	3	3	1	2	2	2	2	1	5	7	1	0	0	0	0	0	0	1	2	0	0	1	0	1	1	1	1	1	0	0	1	3	#NULL!	1	#NULL!	1	3
1	48	4	1	8	1	2	2	2	3	1	7	5	2	3	1	2	2	2	2	1	1	6	1	0	0	1	0	0	0	1	0	0	0	1	0	1	0	1	2	1	1	0	1	2	3	2	#NULL!	1	2
1	55	1	6	55	1	2	2	2	2	1	5	5	3	1	2	2	2	2	2	1	1	1	1	0	1	1	0	0	0	0	0	0	0	1	0	1	0	0	2	1	0	0	0	3	#NULL!	2	#NULL!	1	3
2	50	2	1	1	4	1	#NULL!	#NULL!	2	1	5	5	4	1	1	2	2	2	2	1	7	7	1	1	2	0	0	0	0	0	0	0	1	0	0	0	1	1	0	1	2	2	0	1	#NULL!	#NULL!	#NULL!	1	3
2	54	2	1	3	1	1	#NULL!	#NULL!	1	1	5	5	3	4	1	2	2	2	2	1	6	7	1	0	2	0	1	0	0	0	0	0	0	1	1	1	0	1	0	0	1	1	0	2	#NULL!	#NULL!	#NULL!	1	3
2	24	1	3	24	4	1	#NULL!	#NULL!	2	1	8	6	1	4	2	2	2	2	3	1	1	6	1	0	0	2	0	0	0	2	0	0	0	0	0	0	0	1	0	0	1	1	0	0	1	#NULL!	#NULL!	1	1
2	28	1	3	28	4	1	#NULL!	#NULL!	1	1	5	5	1	3	1	2	2	2	4	5	5	1	1	0	3	1	0	0	0	0	0	0	1	3	0	0	1	1	0	1	1	0	0	1	1	#NULL!	#NULL!	1	1
1	64	1	7	64	1	2	2	5	3	2	8	3	2	4	2	2	2	2	2	1	1	1	1	0	1	0	0	0	0	0	0	0	1	1	0	0	2	1	1	1	1	1	2	3	4	5	#NULL!	1	3
1	60	1	7	60	6	2	2	3	1	2	8	3	4	1	3	2	2	2	1	5	1	1	1	0	0	0	0	0	0	0	0	0	0	0	0	0	0	0	0	0	0	0	0	0	4	3	#NULL!	1	3
2	63	1	7	63	1	2	2	3	1	1	8	4	2	1	2	2	2	2	2	1	1	6	1	0	1	0	1	0	0	0	0	0	0	1	0	1	1	1	1	1	1	0	0	3	4	3	#NULL!	1	3
2	38	4	1	5	4	1	#NULL!	#NULL!	1	1	2	6	4	3	1	2	2	2	1	5	7	7	1	1	2	0	0	0	0	2	0	0	0	1	0	1	0	1	1	1	0	0	0	3	2	#NULL!	#NULL!	1	2
2	35	4	2	12	4	1	#NULL!	#NULL!	1	1	5	6	2	4	2	2	2	2	3	1	1	3	1	0	1	0	1	0	0	0	1	0	1	1	0	0	0	0	1	1	0	0	0	0	2	#NULL!	#NULL!	1	2
2	23	2	1	3	4	1	#NULL!	#NULL!	3	1	2	6	1	4	1	2	2	2	4	1	3	6	1	0	0	0	0	1	0	0	2	0	0	0	0	0	0	0	1	1	0	0	0	0	1	#NULL!	#NULL!	1	1
1	38	1	4	38	1	1	#NULL!	#NULL!	1	1	8	4	3	4	3	2	2	2	2	6	2	1	1	0	1	0	0	0	0	1	1	0	0	1	0	1	0	0	1	0	0	2	1	1	2	#NULL!	#NULL!	1	2
2	35	4	1	6	4	1	#NULL!	#NULL!	3	1	1	5	2	3	1	2	2	2	1	5	4	7	1	0	0	1	0	0	0	1	0	0	0	1	0	1	0	0	2	1	1	1	1	0	2	#NULL!	#NULL!	1	2
2	23	4	1	4	4	1	#NULL!	#NULL!	3	1	5	5	1	4	1	2	2	2	4	5	5	4	1	0	1	1	0	0	1	1	2	0	0	1	0	1	0	0	3	0	0	0	0	0	1	#NULL!	#NULL!	1	1
2	35	4	2	12	4	1	#NULL!	#NULL!	3	1	5	6	3	3	1	2	2	2	1	1	5	7	1	0	0	0	1	0	0	2	3	0	0	1	0	2	2	0	2	1	0	0	0	1	2	#NULL!	#NULL!	1	2
2	38	2	2	10	4	1	1	0	3	1	1	5	2	3	1	2	2	1	1	5	7	7	2	1	3	2	3	1	1	1	1	1	1	1	1	2	2	1	1	1	1	1	1	1	2	2	1	2	2
1	22	1	3	22	4	1	1	0	3	1	1	3	2	3	1	2	2	2	1	5	7	7	1	0	0	0	0	0	0	0	1	0	0	2	0	0	0	1	2	0	0	0	0	0	1	3	1	1	1
1	22	1	1	2	6	2	1	1	3	2	3	3	2	3	1	2	2	2	1	5	7	7	2	0	0	0	0	0	0	0	0	1	2	1	1	3	0	0	1	1	1	1	0	0	1	1	2	1	1
2	48	2	2	10	1	4	2	3	3	1	1	3	3	3	1	2	2	2	4	2	1	7	1	0	0	0	1	0	1	1	1	0	1	1	1	1	0	2	2	1	2	1	1	0	3	2	4	2	2
2	31	2	1	4	1	2	2	1	3	1	1	5	2	3	1	2	2	2	2	1	1	7	1	0	0	0	0	0	0	0	0	0	0	0	0	0	0	0	0	0	0	0	0	0	2	1	2	1	2
2	36	2	2	10	1	7	2	6	1	1	1	2	2	4	1	2	2	2	2	2	1	1	1	1	1	0	1	1	1	1	1	1	1	1	1	1	1	1	1	1	1	1	1	1	2	2	7	2	2
2	18	1	1	8	2	1	1	0	3	1	2	5	2	3	1	2	2	2	2	3	7	7	1	2	3	2	1	2	3	0	2	1	0	0	1	2	3	1	0	0	1	2	3	0	1	1	1	2	1
2	18	1	2	18	4	1	1	0	3	1	8	5	2	1	1	2	2	2	3	5	7	7	1	0	0	0	0	0	0	0	0	0	0	1	2	2	2	0	1	2	0	3	0	1	1	2	1	1	1
2	18	1	2	18	4	1	1	0	3	2	2	5	4	4	1	2	1	1	3	6	7	7	1	0	3	0	3	0	2	1	1	1	0	1	2	2	3	0	1	0	3	1	2	3	1	2	1	2	1
1	28	1	3	28	3	2	2	1	1	2	6	5	3	4	2	2	1	1	2	2	5	1	1	1	0	0	0	1	3	1	1	1	1	1	1	1	0	1	0	0	1	0	1	0	1	3	2	1	1
2	21	1	3	21	4	1	1	0	3	1	5	6	3	1	3	2	2	2	1	1	1	1	1	0	1	0	1	1	1	1	2	0	0	0	1	0	1	1	1	0	1	0	0	1	1	3	1	1	1
2	49	2	5	49	3	3	2	2	3	2	8	6	4	4	3	2	2	2	2	3	7	7	1	0	0	0	0	0	0	0	0	0	0	0	0	0	0	0	0	0	0	0	0	0	3	5	3	1	2
2	55	2	4	30	1	5	2	4	1	1	8	5	4	3	2	1	2	1	2	5	1	6	1	1	0	2	0	0	1	0	0	0	0	0	0	0	0	0	0	0	0	0	0	0	4	4	5	1	3
1	28	1	3	28	1	1	1	0	3	1	5	6	3	1	1	2	2	2	2	1	6	3	1	0	0	0	0	0	0	2	1	0	0	1	1	1	0	0	0	1	0	0	0	0	1	3	1	1	1
2	28	2	1	7	1	1	1	0	3	1	2	6	3	1	1	2	2	1	2	2	7	7	2	1	0	2	1	0	0	0	0	0	0	0	0	0	0	0	0	0	0	0	0	0	1	1	1	1	1
2	20	1	3	20	4	1	1	0	3	2	2	5	4	1	1	2	2	2	3	4	7	7	1	0	0	0	3	0	0	0	0	0	0	0	0	0	0	0	0	0	3	0	0	0	1	3	1	1	1
2	20	2	3	20	4	1	1	0	3	1	1	3	1	3	1	2	2	2	3	5	7	7	2	0	0	0	0	0	0	0	0	0	0	0	0	0	0	0	0	0	0	0	0	0	1	3	1	1	1
2	27	2	1	8	4	1	1	0	2	1	1	5	4	3	1	2	2	2	4	1	7	7	1	0	1	1	0	1	1	1	1	1	1	1	1	1	0	1	1	1	0	0	0	0	1	1	1	1	1
2	38	2	1	5	1	4	2	3	3	1	1	5	2	3	1	2	2	2	6	3	1	7	1	0	0	0	0	0	0	0	0	0	0	0	0	0	0	0	0	0	0	0	0	0	2	1	4	1	2
2	38	2	4	38	1	7	2	10	3	1	5	6	3	3	1	2	2	2	2	5	5	3	1	0	0	0	0	0	0	0	0	0	0	0	0	0	0	0	0	0	0	0	0	0	2	4	7	1	2
2	32	2	1	4	2	1	1	0	3	1	2	6	2	3	1	2	2	2	2	5	7	7	1	1	0	1	2	1	3	2	2	0	0	0	0	0	1	1	1	1	1	3	1	1	2	1	1	2	2
2	25	2	1	5	3	1	1	0	3	2	2	6	1	3	1	1	2	2	4	5	1	7	1	2	1	0	1	0	0	0	0	0	1	2	1	1	0	1	0	1	1	0	0	0	1	1	1	1	1
2	30	2	4	30	1	2	2	1	3	1	5	6	4	3	3	2	2	2	3	1	7	4	1	0	0	0	1	1	0	0	1	0	0	0	0	1	0	0	2	0	0	0	0	0	2	4	2	1	2
2	23	2	2	18	4	1	1	0	3	2	1	5	3	3	1	2	2	2	4	5	7	7	1	0	1	0	2	0	0	0	0	0	0	0	0	0	0	0	1	1	1	1	0	0	1	2	1	1	1
2	40	2	3	27	1	4	2	3	3	1	1	3	5	1	1	2	2	1	2	5	7	7	2	0	0	0	0	1	0	0	0	0	0	0	1	0	0	0	1	1	1	0	2	0	3	3	4	1	2
2	18	1	2	18	4	4	2	3	3	2	2	5	5	4	1	2	1	1	2	1	6	7	1	0	2	2	0	2	0	3	0	1	1	0	0	1	0	1	1	1	1	0	0	0	1	2	4	1	1
2	18	1	2	18	3	1	1	0	3	2	7	1	2	3	1	2	2	2	5	1	5	7	1	2	1	3	2	1	1	0	1	0	0	1	1	0	2	2	1	0	2	0	0	0	1	2	1	2	1
2	19	2	2	17	4	1	1	0	3	2	2	2	2	1	1	2	2	2	3	1	7	1	1	1	2	2	2	2	2	2	2	2	1	2	2	2	2	3	3	2	2	2	2	1	1	2	1	2	1
2	18	2	2	15	7	1	1	0	3	2	2	5	1	3	1	2	2	2	3	1	7	1	1	3	2	1	0	3	1	2	3	1	1	3	1	1	2	2	1	3	2	3	2	1	1	2	1	2	1
1	18	1	2	18	3	1	1	0	3	2	2	2	1	4	1	2	2	2	3	1	6	1	1	1	2	0	1	1	1	1	1	2	2	1	2	3	1	0	2	2	0	0	0	0	1	2	1	2	1
1	25	2	1	2	4	1	1	0	3	1	8	6	3	4	1	2	2	2	4	5	7	6	1	0	0	0	0	0	0	0	0	0	0	0	0	0	0	0	0	0	0	0	0	0	1	1	1	1	1
1	37	2	2	17	1	3	2	2	3	1	1	3	2	1	1	2	2	2	2	5	1	1	1	0	0	0	0	0	0	0	0	0	0	0	0	0	0	0	0	0	0	0	0	0	2	2	3	1	2
2	24	2	1	8	4	1	1	0	3	1	7	4	2	3	1	2	2	2	3	5	1	5	1	0	0	0	0	0	0	0	0	0	0	0	0	0	0	0	0	0	0	0	0	0	1	1	1	1	1
1	25	1	3	25	4	1	1	0	3	1	1	5	2	4	1	2	2	2	3	3	4	6	1	1	0	1	2	1	0	1	1	1	1	1	1	0	0	1	1	0	1	0	1	1	1	3	1	1	1
2	36	2	2	13	4	1	1	0	3	1	4	6	4	1	1	2	2	2	1	1	7	7	1	0	0	0	1	1	0	0	1	0	0	0	0	0	0	0	0	0	0	0	0	0	2	2	1	1	2
1	22	2	3	22	1	1	1	0	2	2	6	4	4	3	2	2	2	1	2	1	7	7	1	0	0	1	1	1	1	1	1	0	2	1	1	1	2	1	3	1	1	3	1	0	1	3	1	2	1
2	32	2	2	17	4	2	1	1	3	1	1	3	2	3	1	2	2	1	4	1	1	7	1	1	1	1	1	1	1	1	0	0	1	1	0	1	0	1	1	1	1	1	0	0	2	2	2	1	2
1	83	2	5	40	1	3	2	2	3	2	8	3	3	2	1	2	2	1	6	1	3	1	1	0	0	0	0	0	0	0	0	0	0	0	0	0	0	0	0	0	0	0	0	2	5	5	3	1	3
1	26	2	1	6	4	1	1	0	1	2	6	3	3	1	2	2	2	2	3	5	7	7	1	0	2	2	0	0	0	1	3	1	3	3	2	1	0	3	3	1	0	1	0	0	1	1	1	2	1
1	19	2	2	15	4	1	1	0	3	2	3	5	4	1	1	2	2	1	3	5	7	7	2	0	0	0	0	0	0	0	0	0	0	3	2	1	0	3	3	1	0	1	0	0	1	2	1	1	1
2	21	1	3	21	4	1	1	0	3	2	8	6	2	4	1	2	2	2	3	5	7	4	2	1	1	0	1	0	0	0	0	0	0	0	0	0	0	0	0	0	0	0	0	0	1	3	1	1	1
2	22	2	2	15	2	1	1	0	3	1	1	5	3	3	1	2	2	2	2	5	7	7	1	1	1	0	2	0	1	0	1	0	1	1	0	1	0	0	1	0	3	0	3	0	1	2	1	1	1
2	23	1	3	23	4	1	1	0	3	1	1	5	4	1	1	2	2	2	3	1	7	7	1	0	0	0	0	0	0	0	0	0	0	0	0	0	0	0	0	0	0	0	0	0	1	3	1	1	1
2	18	3	2	18	4	1	1	0	3	2	2	5	3	4	1	2	2	2	6	2	7	7	1	0	0	0	0	0	0	0	0	0	0	0	0	0	0	0	0	0	0	0	0	0	1	2	1	1	1
2	43	2	4	30	1	3	2	2	3	1	5	5	2	3	1	2	2	2	4	4	1	1	1	0	1	0	3	0	0	0	0	0	0	0	0	0	0	1	2	0	3	2	2	1	3	4	3	1	2
1	30	2	2	11	4	1	1	0	3	1	8	6	4	3	1	2	2	2	4	3	7	1	1	0	0	0	0	1	0	0	1	0	1	0	0	0	0	0	0	0	0	0	0	0	2	2	1	1	2
1	42	2	4	38	4	1	1	0	2	1	8	6	3	2	2	2	2	2	3	2	7	6	1	1	1	0	1	0	0	0	1	0	0	0	1	0	0	0	1	0	2	0	0	0	3	4	1	1	2
1	63	2	5	40	1	7	2	6	3	2	6	1	1	1	1	2	2	2	2	3	1	3	1	0	0	0	0	0	0	0	0	0	0	0	0	0	0	0	0	1	1	0	0	2	5	5	7	1	3
1	62	1	7	62	1	4	2	3	3	2	6	4	4	4	1	2	2	2	2	1	7	7	1	0	0	0	0	0	0	0	0	0	0	0	0	0	0	0	0	0	0	0	0	1	5	7	4	1	3
2	32	2	2	17	1	3	2	2	2	1	1	4	4	1	1	2	2	2	2	5	7	1	1	0	0	0	0	0	0	0	0	0	0	0	0	0	0	0	0	2	1	1	3	3	2	2	3	1	2
1	30	1	4	30	2	1	1	0	1	1	4	6	2	4	1	2	2	2	3	1	3	1	1	0	0	0	0	0	0	0	0	0	0	0	0	0	0	0	0	1	0	0	0	0	2	4	1	1	2
1	45	2	2	11	1	4	2	3	3	1	5	5	3	1	1	2	2	2	2	1	1	7	1	0	1	0	0	0	0	0	0	0	2	1	0	0	0	0	0	2	0	0	3	0	3	2	4	1	2
1	27	1	3	27	1	1	1	0	3	1	1	6	3	3	1	2	2	2	2	1	1	1	1	0	0	0	0	0	0	0	0	0	2	2	1	0	0	0	0	0	0	2	0	0	1	3	1	1	1
1	18	2	1	2	4	1	1	0	1	1	1	4	2	3	1	2	2	2	1	1	1	1	1	0	0	0	0	0	0	0	0	0	1	0	0	0	0	0	0	0	0	0	0	0	1	1	1	1	1
1	37	2	3	25	1	3	2	2	3	1	1	4	2	3	1	2	2	2	2	3	6	7	1	2	1	0	0	0	0	0	0	0	1	0	0	0	0	0	1	2	2	0	0	0	2	3	3	1	2
1	40	1	1	4	1	2	2	1	3	1	8	6	4	4	1	2	2	2	2	1	6	6	1	1	1	0	2	0	0	0	1	0	1	0	0	0	0	0	1	1	0	2	1	0	3	1	2	1	2
2	60	2	5	40	1	2	2	1	3	1	1	3	2	3	1	2	2	2	2	5	7	7	2	1	1	0	3	0	0	0	0	0	1	1	0	0	0	0	2	0	0	1	0	0	5	5	2	1	3
2	28	2	1	7	4	1	1	0	2	2	2	6	2	3	1	2	2	2	3	5	4	7	1	1	2	2	3	1	3	2	1	0	2	3	1	3	2	2	3	2	2	1	0	1	1	1	1	2	1
2	28	2	1	5	4	1	1	0	3	2	2	6	3	3	1	2	2	2	5	3	7	7	2	0	2	0	3	1	0	0	0	1	1	1	2	2	2	2	2	3	0	0	0	1	1	1	1	2	1
2	21	1	1	9	4	1	1	0	3	1	7	3	2	3	1	2	2	2	3	5	1	7	1	0	0	0	0	0	0	0	0	0	0	0	0	0	0	0	0	0	0	0	0	0	1	1	1	1	1
2	19	2	1	2	3	1	1	0	1	1	2	5	2	3	1	2	2	2	3	1	5	5	1	0	0	1	1	0	0	0	1	0	0	1	0	0	0	0	0	0	0	3	0	0	1	1	1	1	1
1	38	1	4	38	1	3	2	2	3	1	1	5	2	3	1	2	2	1	6	3	7	1	1	0	0	0	0	0	0	0	0	0	0	0	0	0	0	0	0	0	0	0	0	0	2	4	3	1	2
1	39	3	3	20	1	2	2	1	3	1	8	1	4	5	2	1	2	2	2	3	2	6	1	0	0	0	0	0	0	0	0	0	0	0	0	0	0	0	0	0	0	0	0	0	2	3	2	1	2
1	46	2	3	23	1	4	2	3	3	1	1	4	2	1	1	2	2	2	2	5	1	7	1	0	0	0	0	0	0	0	1	0	0	0	0	0	0	0	0	0	0	0	0	0	3	3	4	1	2
1	45	2	3	20	1	3	2	2	3	1	1	4	2	1	1	2	2	2	2	5	1	7	1	1	3	0	1	1	0	0	0	0	0	2	1	1	0	1	1	0	2	2	0	0	3	3	3	1	2
2	19	2	2	12	4	1	1	0	3	2	2	5	2	3	1	2	2	2	3	5	1	1	1	1	0	0	1	1	0	0	1	1	0	0	0	0	0	0	0	0	0	0	0	0	1	2	1	1	1
2	22	2	1	4	4	1	1	0	3	2	2	6	1	3	1	2	2	2	4	1	7	1	1	0	0	0	2	2	0	0	2	3	0	0	2	3	0	0	1	2	2	3	3	0	1	1	1	2	1
1	23	2	1	5	2	1	1	0	3	2	2	6	4	4	1	2	2	2	1	1	1	1	1	0	0	0	0	0	0	0	0	0	0	0	0	0	0	0	0	0	0	0	0	0	1	1	1	1	1
2	21	2	1	3	4	1	1	0	3	2	2	6	2	3	1	2	2	2	5	4	7	7	1	1	0	0	1	0	0	0	1	1	0	1	1	3	3	0	2	1	2	1	1	2	1	1	1	2	1
1	19	1	2	19	4	2	1	1	3	2	2	6	2	3	1	2	2	2	3	1	5	1	1	0	0	0	0	1	1	0	1	0	1	1	0	1	1	1	0	0	3	0	0	0	1	2	2	1	1
2	33	1	2	15	1	3	2	2	3	1	1	4	2	1	1	1	2	2	2	3	3	7	1	0	0	0	0	1	3	0	0	0	0	0	0	1	1	1	0	3	2	1	1	1	2	2	3	1	2
2	30	2	1	1	4	1	1	0	3	1	1	3	3	1	2	2	2	1	4	3	7	1	1	0	0	0	2	1	3	0	0	0	1	0	0	1	1	0	0	0	2	2	0	0	2	1	1	1	2
2	37	2	2	15	1	2	2	1	3	1	5	4	3	1	1	2	2	2	2	1	7	7	1	0	0	0	0	0	0	0	0	1	1	1	1	0	1	1	1	2	1	1	0	0	2	2	2	1	2
2	27	2	1	9	4	1	1	0	3	1	1	4	2	1	1	2	2	2	3	5	7	7	2	1	3	0	0	0	0	0	0	0	0	0	1	0	1	0	0	1	0	0	0	0	1	1	1	1	1
2	18	1	2	18	4	1	1	0	3	2	2	5	1	1	1	2	2	2	3	1	7	7	1	0	0	0	0	0	0	0	0	0	0	0	0	0	0	0	0	1	0	1	0	0	1	2	1	1	1
1	39	1	4	39	1	3	2	2	3	1	4	6	4	4	1	2	2	2	2	1	7	1	1	0	0	0	0	0	0	0	0	0	0	0	0	0	0	0	0	0	0	0	0	0	2	4	3	1	2
1	22	2	1	6	1	3	2	2	3	1	1	5	3	3	1	2	2	2	2	3	2	2	1	0	1	0	1	1	1	1	1	0	1	1	1	1	0	1	1	1	1	1	0	0	1	1	3	1	1
1	37	2	3	26	1	3	2	2	3	1	7	4	3	3	1	2	2	2	2	1	3	7	1	0	0	0	0	0	0	0	1	0	0	3	1	1	0	0	1	1	2	0	0	1	2	3	3	1	2
1	20	1	1	2	3	1	1	0	3	2	2	6	2	3	1	2	2	2	3	2	7	7	1	1	1	0	0	1	0	0	0	0	1	1	1	1	0	1	3	1	3	3	0	0	1	1	1	2	1
2	18	2	1	3	4	1	1	0	3	2	2	2	1	5	1	2	2	1	3	5	1	7	1	1	1	1	0	1	1	1	1	0	1	1	0	0	1	0	0	0	2	2	1	0	1	1	1	1	1
2	73	1	7	73	1	4	2	3	3	1	5	6	3	4	1	2	2	2	6	1	7	7	1	0	0	0	0	0	0	0	0	0	0	0	0	0	0	0	0	1	0	0	0	0	5	7	4	1	3
1	29	1	3	29	5	3	2	2	3	2	6	3	3	4	1	2	2	2	4	3	6	3	1	0	0	0	1	0	0	0	1	0	2	1	1	0	0	0	0	0	1	1	0	0	1	3	3	1	1
2	61	1	7	61	1	5	2	4	1	1	7	3	4	1	1	2	2	2	2	1	7	7	1	1	0	0	0	0	0	0	0	0	0	0	0	0	1	1	0	1	1	1	1	2	5	7	5	1	3
1	29	1	3	29	1	4	2	3	3	2	6	3	2	1	1	2	2	2	2	1	7	7	1	1	2	2	2	1	2	2	1	1	1	1	1	0	1	1	2	1	1	1	2	1	1	3	4	2	1
1	26	2	1	7	4	1	1	0	3	2	2	6	2	3	1	2	2	2	4	1	7	7	2	0	0	0	0	0	0	0	0	0	0	0	0	0	0	0	0	0	0	0	0	0	1	1	1	1	1
1	58	1	6	58	1	3	2	2	3	1	4	6	3	1	2	2	2	2	2	6	1	1	1	0	1	2	3	2	0	2	3	0	1	2	1	2	2	2	1	0	2	0	2	3	4	6	3	2	3
1	54	1	6	54	1	4	2	3	3	1	1	3	2	3	1	2	2	2	2	1	5	7	1	0	0	0	1	0	1	1	0	0	1	1	0	0	1	1	1	0	0	1	2	1	4	6	4	1	3
1	38	1	4	38	1	4	2	3	3	1	1	4	3	1	1	2	2	2	2	1	5	6	1	0	0	0	0	0	0	0	1	0	2	0	0	0	0	1	0	1	0	0	1	0	2	4	4	1	2
1	34	1	4	34	1	3	2	2	1	1	6	4	1	3	1	2	2	2	2	2	2	7	1	1	1	1	1	1	2	0	1	1	1	1	1	1	1	1	1	1	1	0	1	1	2	4	3	2	2
1	39	1	4	39	1	2	2	1	3	2	6	4	2	4	3	2	2	2	2	2	1	1	1	0	0	1	0	1	0	1	1	0	3	1	0	2	2	2	2	1	1	0	0	2	2	4	2	2	2
1	39	1	4	39	1	4	2	3	3	2	6	3	2	3	1	2	2	2	2	1	5	1	1	1	1	0	1	1	0	1	0	1	0	1	0	1	1	1	1	1	1	1	1	0	2	4	4	1	2
1	37	1	4	37	1	2	2	1	3	2	6	5	1	4	1	2	2	2	2	2	5	6	1	1	2	1	1	1	1	1	1	1	1	1	1	1	1	1	1	1	1	1	1	0	2	4	2	2	2
1	22	1	3	22	4	1	1	0	3	2	2	6	1	4	1	2	2	2	3	1	5	7	1	0	0	0	1	0	2	1	0	1	0	0	0	1	0	0	1	0	1	1	0	1	1	3	1	1	1
1	24	2	1	6	4	1	1	0	3	2	2	6	1	3	1	2	2	2	4	1	6	1	1	0	0	0	0	0	0	0	0	0	3	0	0	2	0	1	0	0	1	1	0	0	1	1	1	1	1
1	25	2	1	6	4	1	1	0	3	2	2	6	1	3	1	2	2	2	4	5	7	7	1	0	0	0	1	0	0	0	0	0	1	0	0	0	0	0	0	0	0	0	0	0	1	1	1	1	1
1	22	1	3	22	4	1	1	0	3	2	2	6	1	4	1	2	2	2	3	2	7	7	1	0	0	0	0	0	0	0	0	0	0	0	0	0	0	0	0	0	0	0	0	0	1	3	1	1	1
1	36	1	4	36	1	3	2	2	3	1	8	4	3	4	1	2	2	2	2	2	5	7	1	0	0	0	0	0	0	0	0	0	0	1	1	1	0	0	0	0	0	0	0	1	2	4	3	1	2
1	35	1	4	35	1	4	2	3	3	2	6	3	3	4	2	2	2	2	2	1	1	1	1	0	0	0	0	0	0	0	0	0	0	0	0	0	0	0	0	0	0	0	0	0	2	4	4	1	2
1	39	1	4	39	1	3	2	2	3	1	5	3	3	4	3	2	2	2	2	3	1	1	1	1	1	0	1	1	0	1	1	1	1	1	0	1	0	0	0	1	1	1	0	1	2	4	3	1	2
1	54	3	6	54	1	5	2	4	3	2	6	4	2	3	2	2	2	2	2	2	7	7	1	1	1	2	0	0	0	1	0	0	1	3	1	1	1	1	1	1	2	0	0	1	4	6	5	2	3
1	54	1	6	54	1	3	2	2	3	2	6	4	4	4	1	2	2	2	2	2	6	7	1	0	0	1	0	0	0	1	1	0	0	0	0	0	1	1	1	2	1	1	1	2	4	6	3	1	3
1	53	1	6	53	1	4	2	3	1	2	6	3	3	1	3	2	2	2	2	1	5	6	1	0	0	1	1	3	2	1	1	1	3	2	1	1	1	1	1	2	3	2	0	3	4	6	4	2	3
2	54	1	6	54	1	3	2	2	3	1	4	6	3	1	1	2	2	2	2	1	4	7	1	1	1	1	0	1	1	1	1	0	0	1	1	1	1	1	1	1	1	2	0	0	4	6	3	2	3
1	22	1	3	22	4	1	1	0	1	2	2	6	4	4	1	2	2	2	3	1	7	7	1	0	0	0	0	0	0	0	0	0	0	0	0	0	0	0	0	0	0	0	0	0	1	3	1	1	1
2	50	2	1	4	1	7	2	6	3	1	7	5	3	4	1	2	2	2	2	1	7	7	2	0	0	0	1	1	0	2	1	0	1	3	2	1	2	2	2	1	1	0	1	1	4	1	7	2	3
2	51	1	6	51	1	1	1	0	3	1	5	6	2	1	2	2	2	2	1	2	7	7	1	0	0	0	3	0	0	0	1	0	0	3	0	0	2	2	1	2	2	0	0	1	4	6	1	2	3
2	52	1	6	52	5	3	2	2	3	1	7	5	3	1	3	2	2	2	1	1	7	7	1	1	0	1	0	1	0	0	1	0	1	0	1	0	1	0	0	0	0	0	1	0	4	6	3	1	3
2	67	2	3	20	1	4	2	3	3	2	7	5	3	4	1	2	2	2	2	1	7	7	1	0	0	0	0	0	0	1	1	0	0	0	0	1	1	0	0	2	0	1	0	2	5	3	4	1	3
1	40	2	3	20	4	1	1	0	3	1	5	6	4	3	3	2	2	2	1	1	7	7	1	0	0	0	0	0	0	0	0	0	0	1	0	1	1	1	1	0	1	1	0	1	3	3	1	1	2
1	40	1	5	40	4	1	1	0	3	1	8	5	3	4	1	2	2	2	3	1	5	7	1	0	0	0	0	0	0	0	0	0	0	0	0	0	0	0	0	0	0	0	0	0	3	5	1	1	2
2	43	1	5	43	4	1	1	0	3	1	7	6	3	4	1	2	2	2	3	1	6	7	1	1	1	1	0	0	0	1	0	1	0	0	1	0	0	0	0	1	0	0	0	0	3	5	1	1	2
1	68	1	7	68	1	5	2	4	3	2	6	5	2	1	1	2	2	2	6	1	6	1	1	0	0	0	0	0	0	0	0	0	1	0	0	1	1	0	0	0	1	2	2	0	5	7	5	1	3
2	45	1	5	45	1	3	2	2	3	1	7	1	2	4	1	2	2	2	2	1	7	7	1	1	2	1	2	0	0	1	0	0	0	1	0	0	1	2	1	1	0	0	0	1	3	5	3	1	2
2	69	2	7	69	7	4	2	3	3	2	8	3	2	1	1	2	2	2	1	1	5	7	1	0	0	0	0	0	0	0	0	0	0	0	0	0	0	1	1	1	1	1	2	0	5	7	4	1	3
1	60	1	5	40	1	3	2	2	3	1	8	6	3	1	1	2	2	2	2	1	4	7	1	0	0	0	0	0	0	0	0	0	0	0	0	0	0	0	0	1	0	1	1	1	5	5	3	1	3
2	62	1	7	62	1	4	2	3	3	1	8	6	4	1	3	2	2	2	2	1	1	1	1	1	0	0	0	0	1	0	0	1	0	0	0	0	1	0	0	1	1	1	0	1	5	7	4	1	3
2	77	1	7	77	1	4	2	3	3	1	8	6	4	1	1	1	2	2	1	1	6	7	1	0	0	0	0	0	0	0	0	0	0	0	0	0	0	0	0	0	0	0	0	0	5	7	4	1	3
2	41	2	2	17	1	2	1	1	3	1	5	6	4	1	1	1	2	2	2	1	1	1	1	1	0	0	0	0	0	0	0	0	0	2	1	0	0	0	0	0	1	1	0	0	3	2	2	1	2
2	32	2	2	10	1	2	2	1	3	1	5	6	4	2	1	2	2	2	2	2	7	7	1	0	0	0	0	1	0	0	0	0	0	1	1	1	1	1	0	0	0	0	0	0	2	2	2	1	2
1	50	2	3	20	1	5	2	4	3	2	6	3	2	4	1	2	2	2	3	2	7	7	1	1	3	2	2	3	2	1	1	1	1	2	1	2	2	2	1	1	1	1	2	2	4	3	5	2	3
1	50	2	2	10	4	1	1	0	3	2	5	6	2	3	1	2	2	2	1	2	7	7	1	0	1	1	1	1	1	1	1	0	1	2	1	1	0	0	0	1	1	2	1	1	4	2	1	2	3
1	69	2	4	37	1	5	2	4	3	2	6	3	4	1	1	2	2	2	1	1	7	1	1	1	1	1	1	1	1	1	1	1	2	1	2	2	1	1	2	1	2	1	1	1	5	4	5	2	3
2	19	2	1	4	4	1	1	0	3	2	2	6	1	3	1	1	2	2	4	5	7	7	2	0	1	1	1	3	3	2	1	1	1	1	1	1	1	1	1	1	1	1	1	1	1	1	1	2	1
2	28	1	1	3	1	4	1	3	2	2	6	6	1	4	1	2	2	2	4	5	7	7	1	1	1	1	1	1	0	0	0	1	0	2	0	1	2	1	1	0	1	1	1	1	1	1	4	2	1
2	26	2	1	3	4	1	1	0	3	1	2	6	3	4	1	2	2	2	3	3	1	7	1	0	0	0	0	1	0	0	0	0	0	3	2	2	1	1	2	1	2	1	0	0	1	1	1	1	1
2	24	2	2	10	4	1	1	0	3	1	1	4	2	3	3	2	2	2	3	5	1	7	1	1	0	0	1	1	0	0	0	1	0	0	0	0	0	0	0	0	0	0	0	0	1	2	1	1	1
2	18	2	1	1	4	1	1	0	2	2	2	6	1	3	1	2	2	2	4	5	7	7	1	2	0	1	0	0	0	0	1	1	0	0	0	1	0	0	1	1	2	0	0	0	1	1	1	1	1
1	27	2	1	8	1	3	2	2	3	1	1	3	3	3	1	2	2	2	2	5	1	1	1	0	0	0	0	0	0	0	2	3	0	3	3	1	1	0	1	3	2	2	3	1	1	1	3	2	1
2	30	4	1	8	4	1	1	0	3	2	2	6	3	3	1	2	2	2	3	1	7	7	1	0	0	0	0	0	0	0	0	0	0	0	0	0	0	0	0	0	0	0	0	0	2	1	1	1	2
2	30	4	1	7	1	4	1	3	2	2	6	1	2	2	2	2	2	2	1	5	2	1	1	0	0	0	0	0	0	0	0	0	0	0	0	0	0	0	0	0	0	0	0	0	2	1	4	1	2
2	46	2	1	2	4	1	1	0	3	2	2	6	2	3	1	2	2	2	1	1	7	7	1	0	0	0	0	1	0	0	1	0	0	1	0	1	0	0	0	0	0	0	0	0	3	1	1	1	2
2	42	2	1	6	5	1	1	0	3	1	5	6	3	4	1	2	2	2	1	1	3	1	1	0	0	0	0	0	0	0	0	0	0	0	0	0	1	1	0	1	0	0	0	0	3	1	1	1	2
2	26	2	2	18	1	1	1	0	3	1	4	6	3	2	3	2	2	2	2	2	7	7	1	1	0	0	0	1	0	0	0	0	0	0	0	0	0	0	0	1	1	1	2	0	1	2	1	1	1
2	61	2	4	30	1	6	2	5	2	1	1	3	3	3	1	2	2	2	3	3	7	7	1	0	0	0	0	0	0	0	0	0	1	2	0	1	1	0	1	1	1	3	3	1	5	4	6	1	3
2	24	4	1	5	4	1	1	0	3	2	2	6	3	3	1	2	2	2	3	3	7	1	1	1	0	0	0	1	1	0	0	0	0	0	0	1	0	1	1	1	1	1	0	0	1	1	1	1	1
2	18	2	2	10	4	1	1	0	1	2	2	6	1	3	1	2	2	2	4	5	7	7	1	0	0	0	1	1	0	1	1	0	0	0	0	0	0	0	0	0	0	0	0	0	1	2	1	1	1
2	24	1	3	24	2	1	1	0	3	1	8	5	3	4	1	2	1	1	2	3	7	7	1	0	0	0	0	0	0	0	0	0	0	1	1	1	1	1	1	1	1	1	1	1	1	3	1	1	1
2	33	2	2	10	4	1	1	0	3	1	1	3	2	3	1	2	2	2	3	3	7	7	1	0	0	0	0	0	0	0	0	0	0	0	0	0	0	0	0	0	0	0	0	2	2	2	1	1	2
2	41	2	5	40	1	4	2	3	3	1	5	5	4	4	1	2	2	2	2	2	3	5	1	0	0	0	0	0	0	0	0	0	0	0	0	0	0	0	0	0	0	0	0	1	3	5	4	1	2
1	36	2	2	10	1	5	2	4	3	1	5	5	4	3	1	2	2	2	2	5	2	1	1	0	0	0	1	0	0	0	1	0	2	0	0	0	0	0	0	0	0	0	0	0	2	2	5	1	2
2	32	2	2	10	1	3	2	2	3	1	5	6	4	1	1	2	2	2	2	2	1	1	1	0	0	0	0	0	0	0	0	0	0	0	0	0	0	0	0	0	0	3	0	0	2	2	3	1	2
1	46	2	2	10	4	3	2	2	3	1	8	4	3	1	1	2	2	2	2	1	5	7	1	1	3	0	0	1	0	2	1	0	1	0	0	0	2	1	2	1	1	0	0	0	3	2	3	1	2
1	40	2	2	18	1	4	2	3	3	2	6	4	2	3	1	2	2	2	2	2	1	7	1	1	1	0	2	1	0	0	0	1	1	1	1	1	0	0	1	1	1	1	0	1	3	2	4	1	2
2	40	2	2	10	5	3	2	2	3	1	1	4	3	3	1	2	2	2	4	1	7	7	1	1	1	1	1	0	0	1	1	0	1	1	0	1	2	1	1	1	0	0	0	1	3	2	3	1	2
1	49	1	5	49	1	3	2	2	3	2	5	5	3	1	1	2	2	2	2	2	1	1	1	0	1	0	0	0	0	0	0	0	0	0	0	0	1	0	0	1	0	0	1	0	3	5	3	1	2
2	30	2	2	11	1	2	2	1	3	1	1	3	3	3	1	2	2	2	2	1	7	7	1	0	0	0	0	0	0	0	0	2	2	0	0	0	0	0	1	2	0	3	3	0	2	2	2	1	2
1	46	2	2	15	1	4	2	3	3	1	6	3	2	3	1	2	2	2	2	1	1	1	1	0	0	0	1	0	0	0	1	0	0	0	0	0	0	0	0	1	1	1	0	1	3	2	4	1	2
2	30	2	2	15	1	3	2	2	3	1	4	4	3	1	1	2	2	2	2	1	7	7	1	0	0	0	1	0	0	0	0	0	0	0	0	1	0	0	0	0	0	3	0	0	2	2	3	1	2
2	46	1	5	46	1	3	2	2	1	1	1	4	3	1	1	2	2	2	2	3	7	7	1	1	0	0	0	0	3	0	0	0	0	0	0	0	1	1	0	2	0	3	0	1	3	5	3	1	2
2	59	1	6	59	1	4	2	3	1	1	1	3	3	1	1	2	2	2	2	2	7	7	1	0	0	0	0	0	0	0	0	0	0	2	0	0	0	0	0	2	0	0	0	0	4	6	4	1	3
2	72	1	7	72	1	7	2	6	1	2	8	3	2	2	2	2	2	2	2	1	7	1	1	1	1	1	2	0	0	0	0	0	0	1	1	2	1	2	2	2	0	1	2	0	5	7	7	2	3
2	63	1	7	63	1	7	2	6	1	2	8	3	3	1	1	1	2	2	2	3	1	1	1	0	0	0	1	0	0	0	0	0	0	1	1	1	1	1	1	1	0	0	2	1	5	7	7	1	3
2	43	2	2	13	1	5	2	4	3	1	1	4	3	3	2	2	2	2	2	4	7	7	2	3	1	1	3	2	2	3	1	0	1	1	1	1	2	0	1	2	1	2	2	2	3	2	5	2	2
1	51	4	5	45	1	5	2	4	3	1	1	6	2	4	1	2	2	2	1	5	1	1	1	0	0	0	0	0	0	0	0	0	0	0	0	0	0	0	0	0	0	0	0	0	4	5	5	1	3
2	52	2	2	16	1	2	2	1	3	1	1	3	2	3	1	2	2	2	2	3	1	6	1	0	0	0	0	0	0	0	0	0	0	0	0	0	0	0	0	0	0	0	0	0	4	2	2	1	3
2	45	2	2	15	1	3	2	2	3	1	5	3	3	1	1	2	2	2	2	2	1	7	1	0	0	0	0	0	0	0	0	0	1	2	0	0	0	0	0	2	0	0	0	0	3	2	3	1	2
2	57	2	3	20	4	1	1	0	3	1	7	3	2	3	1	2	2	2	1	3	7	7	1	0	0	0	1	0	0	0	0	0	1	1	1	1	0	1	0	1	0	0	0	0	4	3	1	1	3
1	45	2	3	25	1	4	2	3	3	1	1	3	2	4	2	2	2	2	2	3	1	7	1	0	0	0	1	0	0	1	1	0	3	1	0	0	0	0	0	1	0	0	0	0	3	3	4	1	2
2	33	1	4	33	4	1	1	0	2	1	5	6	4	1	1	2	2	2	1	5	1	1	1	1	1	1	2	2	2	3	1	1	2	3	2	2	1	3	1	1	2	1	3	2	2	4	1	2	2
2	33	2	1	7	1	1	1	0	3	1	1	4	3	3	1	2	2	2	2	5	7	7	2	0	0	0	0	0	0	0	0	0	0	0	0	0	0	0	0	0	0	0	0	0	2	1	1	1	2
2	30	1	4	30	2	1	1	0	3	1	5	6	3	4	3	2	2	2	2	1	7	7	1	0	1	2	0	1	0	0	0	0	0	0	0	0	1	1	0	1	1	0	0	0	2	4	1	1	2
1	26	1	3	26	2	1	1	0	3	1	5	6	1	4	3	2	2	2	2	1	7	1	1	1	0	0	0	1	0	0	0	0	1	1	0	1	0	1	0	1	0	1	0	1	1	3	1	1	1
2	42	1	5	42	1	3	2	2	1	1	5	5	4	1	1	2	2	2	2	1	7	7	1	0	0	0	0	0	0	0	0	0	0	0	0	0	0	0	0	0	0	0	0	0	3	5	3	1	2
2	57	2	1	5	1	4	2	3	3	1	4	4	2	1	1	2	2	2	2	3	7	7	1	0	0	0	0	0	0	0	0	0	0	0	0	0	0	0	0	0	0	0	0	0	4	1	4	1	3
2	31	1	4	31	1	2	2	1	2	1	1	6	3	3	1	2	2	2	2	3	7	7	1	0	0	0	0	0	0	0	0	0	0	0	0	0	0	0	0	0	0	0	0	0	2	4	2	1	2
2	32	2	1	5	1	2	2	1	3	1	5	5	3	1	1	2	2	2	2	1	7	7	1	0	0	0	0	0	0	0	0	0	0	0	0	0	0	0	0	0	0	0	0	0	2	1	2	1	2
1	40	2	3	29	6	3	2	2	3	1	1	5	3	1	1	2	2	2	6	1	7	7	1	0	1	0	1	0	0	0	0	0	2	0	0	0	0	1	0	2	0	2	0	0	3	3	3	1	2
2	40	2	2	16	1	3	2	2	3	1	5	1	3	1	1	2	2	2	2	3	7	7	1	0	0	0	0	0	0	0	0	0	0	0	0	0	0	0	0	0	0	0	0	0	3	2	3	1	2
1	41	2	4	32	1	3	2	2	1	1	1	3	2	1	1	2	2	2	2	3	1	1	1	0	0	0	0	0	0	0	0	0	0	0	0	0	0	0	0	0	0	0	0	0	3	4	3	1	2
2	53	1	6	53	1	4	2	3	3	1	5	5	3	1	1	2	2	2	2	3	1	5	1	0	0	0	0	0	0	0	0	0	0	0	0	0	0	0	0	0	0	0	0	0	4	6	4	1	3
2	44	2	5	41	1	2	2	1	3	1	5	6	5	1	3	2	2	2	2	2	7	7	1	1	0	0	0	0	1	0	0	0	1	1	0	0	0	0	0	0	1	3	0	0	3	5	2	1	2
1	30	2	2	10	1	4	2	3	3	1	1	5	2	3	3	2	2	2	2	5	1	1	1	3	2	3	0	3	2	3	0	2	3	1	2	0	0	0	3	0	1	1	0	0	2	2	4	2	2
1	34	2	1	8	1	1	1	0	3	1	5	6	4	4	1	2	2	2	2	5	7	1	1	0	1	0	1	1	1	1	3	1	1	1	1	1	2	1	1	2	1	1	0	1	2	1	1	2	2
1	21	2	1	2	3	1	1	0	3	2	2	6	1	4	2	2	2	2	1	1	2	1	1	1	1	0	1	0	0	0	0	1	1	1	0	0	0	0	0	0	0	1	0	0	1	1	1	1	1
2	28	2	2	17	1	3	2	2	3	1	1	5	3	3	1	2	2	2	2	1	7	7	1	1	0	0	1	1	0	0	1	0	0	1	1	0	1	1	1	1	2	2	0	0	1	2	3	1	1
1	31	4	1	2	3	3	2	2	3	1	1	5	5	4	3	1	2	2	2	6	1	6	1	2	3	0	2	0	3	2	2	1	3	3	1	1	0	1	1	2	0	3	2	2	2	1	3	2	2
2	22	2	1	4	4	4	1	3	2	2	6	1	3	1	2	2	2	2	1	1	4	4	1	0	0	0	0	0	0	0	0	0	0	0	0	0	0	0	0	0	0	0	0	0	1	1	4	1	1
2	22	2	1	4	4	4	1	3	2	2	6	1	3	1	2	2	2	1	3	4	3	1	1	0	0	0	1	0	0	0	0	0	0	1	0	0	0	1	0	0	0	0	0	0	1	1	4	1	1
1	53	1	6	53	1	4	2	3	2	2	5	3	1	1	2	2	2	2	3	2	7	1	1	1	0	0	1	1	0	1	0	0	1	1	1	1	1	1	1	1	1	2	0	1	4	6	4	1	3
1	45	2	2	10	1	2	2	1	3	2	2	3	2	3	1	2	2	2	2	5	1	1	1	0	0	0	0	0	0	0	1	0	2	3	2	1	0	0	3	2	0	0	0	0	3	2	2	1	2
2	60	2	3	26	1	1	1	0	3	1	5	5	2	3	1	2	2	2	1	3	7	7	1	0	0	0	0	1	0	0	0	0	0	1	0	0	0	0	0	1	0	0	0	1	5	3	1	1	3
1	63	1	7	63	1	5	2	4	3	2	6	2	2	1	1	1	2	2	1	1	1	1	1	1	1	2	0	1	1	0	0	0	0	1	1	1	0	2	1	1	0	0	0	2	5	7	5	1	3
1	70	1	7	70	1	4	2	3	3	2	6	2	5	1	1	2	2	2	2	2	1	7	1	0	2	2	1	2	3	1	1	0	1	1	0	1	1	1	1	1	3	0	1	1	5	7	4	2	3
1	68	1	7	68	6	5	2	4	3	2	6	2	4	1	1	2	2	1	1	3	1	1	1	1	2	3	1	3	3	0	0	1	1	0	1	1	2	0	1	1	1	1	0	1	5	7	5	2	3
1	52	2	3	28	1	7	2	6	3	1	5	5	4	1	1	2	2	2	2	5	7	7	1	1	1	0	1	1	0	0	0	0	0	1	0	1	0	1	0	1	0	0	0	0	4	3	7	1	3
1	71	1	7	71	6	5	2	4	3	2	6	3	3	4	1	1	2	2	5	1	7	7	1	2	2	2	2	2	2	2	3	2	2	2	3	2	2	2	2	3	2	2	2	2	5	7	5	2	3
1	66	2	1	4	1	4	2	3	3	2	8	5	3	1	1	2	2	2	2	1	7	7	1	1	1	1	1	1	1	1	1	1	1	1	1	1	1	1	1	1	1	2	2	2	5	1	4	2	3
1	68	2	3	28	1	5	2	4	3	1	5	6	4	1	1	2	2	2	2	1	7	7	1	1	1	1	1	1	1	1	1	1	1	1	1	1	1	1	1	1	1	1	1	1	5	3	5	2	3
1	61	2	3	21	1	7	2	7	3	2	6	3	2	1	1	1	2	2	2	3	1	1	1	2	3	1	1	2	1	2	2	0	0	2	3	1	0	1	2	1	2	1	2	2	5	3	7	2	3
1	61	1	7	61	2	2	2	1	2	2	3	4	1	1	1	2	2	2	2	1	7	7	1	0	0	0	0	0	0	0	0	0	0	0	0	1	0	0	0	0	0	0	0	1	5	7	2	1	3
1	64	3	4	32	1	4	2	3	3	1	4	6	4	1	1	2	2	2	2	2	5	7	1	0	0	0	0	0	0	0	0	0	0	0	0	0	0	0	0	1	1	1	1	2	5	4	4	1	3
1	61	2	5	42	1	4	2	3	1	2	8	4	2	3	2	2	2	2	2	5	1	1	1	1	1	2	1	1	1	1	1	1	1	1	1	2	3	2	1	1	1	1	1	1	5	5	4	2	3
2	66	2	4	33	1	3	2	2	1	1	5	2	3	3	2	2	2	2	2	1	7	7	1	1	1	0	1	2	0	1	1	0	1	1	1	1	0	1	1	1	1	1	1	2	5	4	3	2	3
2	71	2	4	30	1	6	2	5	3	1	5	3	2	3	1	2	2	2	2	5	7	7	1	1	1	0	0	0	0	0	0	0	0	1	0	0	1	0	1	1	0	0	1	2	5	4	6	1	3
2	62	2	3	20	1	7	2	7	2	1	1	3	3	3	1	2	2	2	2	3	7	7	1	0	0	0	1	1	0	0	2	0	2	0	0	2	2	2	1	2	0	3	2	2	5	3	7	2	3
1	55	1	#NULL!	#NULL!	3	2	1	#NULL!	3	1	4	5	2	4	1	2	2	2	4	1	7	7	1	0	0	0	0	0	0	0	0	0	0	0	0	0	0	0	0	0	0	0	0	0	4	#NULL!	2	1	3
2	51	1	#NULL!	#NULL!	1	1	2	2	3	1	4	5	4	1	1	2	2	2	2	1	7	6	1	1	1	1	1	1	1	1	1	1	1	1	1	1	1	1	1	1	1	1	1	1	4	#NULL!	3	2	3
1	53	2	#NULL!	#NULL!	1	1	2	3	3	1	7	5	4	1	1	2	2	2	2	3	5	7	1	0	0	0	0	0	0	0	0	0	0	0	0	0	0	0	0	0	0	0	0	2	4	#NULL!	3	1	3
1	42	1	#NULL!	#NULL!	3	1	2	4	3	1	7	6	3	3	1	2	2	2	6	2	7	7	2	0	1	0	1	2	2	2	2	2	2	2	1	3	2	3	2	2	3	2	2	3	3	#NULL!	3	2	2
1	35	1	#NULL!	#NULL!	1	2	2	2	3	1	4	6	3	4	1	2	2	2	2	2	7	1	1	0	1	0	0	0	0	0	0	0	0	0	0	0	0	0	0	0	0	0	0	0	2	#NULL!	3	1	2
2	37	1	#NULL!	#NULL!	1	2	2	2	3	1	7	5	3	4	2	2	2	2	2	5	7	7	1	0	1	0	1	0	0	0	0	0	0	0	0	0	0	0	0	0	0	1	0	0	2	#NULL!	3	1	2
2	26	2	#NULL!	#NULL!	4	2	2	3	3	2	2	6	1	1	1	2	2	2	4	1	7	7	1	0	0	0	0	0	0	0	0	1	3	0	0	2	0	0	0	0	1	2	0	0	1	#NULL!	3	1	1
2	25	2	1	7	4	2	2	3	2	2	6	5	4	1	2	2	2	2	4	5	7	7	2	0	1	2	1	0	0	0	0	0	1	3	1	0	2	3	3	0	0	0	0	0	1	1	3	2	1
2	27	1	#NULL!	#NULL!	1	1	1	#NULL!	1	1	1	6	2	3	3	2	2	1	2	3	1	5	1	1	3	2	2	0	1	1	1	2	1	1	0	2	3	2	1	0	1	1	1	1	1	#NULL!	2	2	1
1	23	2	1	2	1	2	1	#NULL!	3	2	2	6	3	1	1	2	2	2	4	2	2	3	1	1	0	0	0	2	0	2	1	2	0	3	1	1	1	1	1	0	1	0	0	2	1	1	2	2	1
1	19	2	1	1	3	2	1	#NULL!	3	2	2	6	1	3	1	2	2	2	4	3	2	4	1	1	2	0	1	0	0	0	0	0	0	1	2	2	1	1	0	2	0	0	0	0	1	1	2	1	1
1	21	2	1	1	4	1	1	#NULL!	3	2	2	6	1	3	1	2	2	2	1	5	1	7	1	1	2	0	2	2	0	2	3	1	0	2	1	1	2	1	2	2	0	0	0	0	1	1	2	2	1
1	21	2	#NULL!	#NULL!	4	2	1	#NULL!	3	2	2	6	3	1	1	2	2	2	4	1	1	1	1	0	0	0	0	0	0	1	0	0	1	0	1	0	0	2	0	2	0	0	0	0	1	#NULL!	2	1	1
1	21	2	#NULL!	#NULL!	4	1	1	#NULL!	3	2	2	6	3	4	1	2	2	2	4	5	7	1	1	0	0	0	1	0	0	0	0	0	0	0	0	0	0	1	3	1	1	3	0	3	1	#NULL!	2	1	1
1	27	1	#NULL!	#NULL!	1	1	2	2	3	1	8	6	3	1	1	2	2	2	2	1	5	1	1	1	1	0	1	1	1	1	0	0	1	1	1	1	1	1	1	1	1	1	1	1	1	#NULL!	3	2	1
2	52	2	#NULL!	#NULL!	1	2	2	3	3	2	8	5	3	1	1	2	2	2	2	5	7	7	1	0	0	0	0	0	0	0	0	0	0	0	0	0	2	2	0	1	1	1	1	2	4	#NULL!	3	1	3
1	33	2	1	8	1	2	2	2	3	2	6	5	3	3	1	2	2	2	2	1	1	1	1	0	0	0	0	0	0	0	0	0	1	0	0	0	0	0	0	0	0	0	0	1	2	1	3	1	2
1	34	1	#NULL!	#NULL!	1	2	2	1	3	1	4	6	4	4	1	2	2	2	2	1	7	7	1	0	0	0	0	1	0	2	0	0	1	1	0	0	0	1	0	0	0	1	0	1	2	#NULL!	3	1	2
1	33	2	1	2	6	2	2	2	3	1	4	6	4	1	1	2	2	2	2	6	7	7	1	0	0	0	0	0	0	0	0	0	0	0	0	0	0	0	0	0	0	0	0	0	2	1	3	1	2
1	32	2	1	2	4	1	1	#NULL!	3	2	4	6	3	4	1	2	2	2	4	3	7	7	1	0	1	0	2	0	0	1	0	0	0	1	0	0	0	0	0	1	0	0	0	0	2	1	2	1	2
2	35	2	1	8	1	2	2	2	3	1	4	5	3	3	1	2	2	2	2	6	1	3	1	0	0	0	0	0	0	0	0	0	0	0	0	0	0	0	0	0	0	0	0	0	2	1	3	1	2
2	37	1	#NULL!	#NULL!	4	1	1	#NULL!	3	1	1	6	3	1	1	2	2	2	2	1	7	7	1	2	2	2	2	2	3	3	0	1	0	3	2	0	0	0	1	3	1	0	1	1	2	#NULL!	2	2	2
2	36	2	1	2	2	1	1	#NULL!	3	1	5	6	3	4	2	2	2	2	2	5	7	7	1	0	0	0	0	1	1	2	3	2	1	1	1	3	1	1	1	2	1	3	2	1	2	1	2	2	2
2	35	2	1	3	2	1	1	#NULL!	1	1	5	6	3	3	1	1	2	2	3	5	7	7	1	0	0	0	1	0	0	0	0	0	0	0	0	0	0	0	0	0	0	0	0	0	2	1	2	1	2
1	60	1	#NULL!	#NULL!	1	1	2	2	3	2	4	5	4	1	1	1	2	2	2	1	5	6	1	1	3	0	1	1	3	0	1	0	0	1	1	1	1	1	1	1	0	0	0	3	5	#NULL!	3	2	3
2	70	1	#NULL!	#NULL!	1	1	2	2	1	2	4	5	3	1	1	2	2	2	2	1	7	1	1	0	2	0	0	0	0	0	0	0	1	0	0	1	1	2	1	1	1	0	1	1	5	#NULL!	3	1	3
2	68	1	#NULL!	#NULL!	1	1	2	2	1	2	8	5	3	4	1	2	2	2	2	1	7	1	1	0	0	0	1	0	0	0	0	0	0	0	0	0	0	1	1	1	1	0	0	2	5	#NULL!	3	1	3
2	68	1	#NULL!	#NULL!	1	1	2	2	3	2	4	6	3	1	1	2	2	2	2	1	7	6	1	0	0	0	0	0	0	0	0	0	1	1	0	0	0	0	0	1	1	0	1	1	5	#NULL!	3	1	3
2	44	2	5	41	1	1	2	2	1	1	8	6	4	1	1	2	2	2	2	1	5	1	1	0	0	0	0	0	0	0	0	0	0	1	0	0	0	0	1	1	0	0	2	0	3	5	3	1	2
1	48	1	#NULL!	#NULL!	1	1	2	4	3	2	6	5	2	4	3	1	2	2	2	4	1	1	1	2	2	1	2	0	0	2	3	1	1	3	2	1	1	2	1	1	1	1	0	3	3	#NULL!	3	2	2
2	38	2	#NULL!	#NULL!	1	1	2	4	3	1	1	4	3	3	1	2	2	2	2	3	1	1	1	1	0	1	0	0	0	0	0	1	0	0	0	0	0	0	0	0	0	0	0	0	2	#NULL!	3	1	2
2	41	1	#NULL!	#NULL!	1	1	2	2	3	1	8	6	3	1	1	2	2	2	2	1	7	3	1	0	3	0	1	0	0	1	0	0	3	1	1	1	1	1	1	1	0	0	1	1	3	#NULL!	3	2	2
2	46	1	#NULL!	#NULL!	1	1	2	4	2	2	3	4	2	2	1	2	2	2	2	2	7	7	1	1	1	2	1	0	3	1	0	0	1	1	1	2	2	1	1	1	2	2	2	1	3	#NULL!	3	2	2
2	45	2	#NULL!	#NULL!	1	1	2	4	1	1	1	5	3	1	1	2	2	2	2	1	4	7	1	0	0	0	0	0	1	1	0	0	1	0	0	0	0	0	0	2	0	0	0	0	3	#NULL!	3	1	2
1	58	1	#NULL!	#NULL!	1	1	2	1	3	2	6	5	4	1	1	2	2	2	2	1	7	7	1	0	1	0	1	1	0	0	0	0	0	3	0	1	0	0	1	1	1	0	0	2	4	#NULL!	3	1	3
2	58	1	#NULL!	#NULL!	1	1	2	2	3	2	8	6	4	1	1	2	2	2	2	1	7	7	1	0	1	0	0	0	0	0	0	0	3	3	0	0	1	0	0	0	0	0	0	0	4	#NULL!	3	1	3
2	25	2	1	5	3	1	1	#NULL!	3	1	1	5	2	4	1	2	2	2	1	1	2	4	1	0	0	0	1	1	1	0	0	0	1	0	0	0	0	0	0	0	0	0	1	1	1	1	2	1	1
2	24	2	#NULL!	#NULL!	2	1	1	#NULL!	2	1	1	5	3	3	1	2	2	2	4	5	7	7	2	0	0	0	0	0	0	0	0	0	0	0	0	0	0	0	0	0	0	0	0	0	1	#NULL!	2	1	1
1	26	2	#NULL!	#NULL!	5	1	2	1	3	1	8	5	2	3	1	2	2	1	6	5	7	7	1	2	1	1	1	2	3	1	1	1	1	1	2	2	1	1	1	1	1	2	0	3	1	#NULL!	3	2	1
2	24	2	1	2	4	1	1	#NULL!	3	2	2	6	3	4	1	2	2	2	3	5	7	7	2	0	0	0	0	0	0	0	0	1	2	2	2	0	0	0	0	0	0	0	0	0	1	1	2	1	1
2	61	1	#NULL!	#NULL!	1	2	2	1	1	1	5	5	2	1	2	2	2	2	2	1	7	7	1	0	0	0	0	0	0	0	0	0	0	0	0	0	1	1	0	0	1	1	0	0	5	#NULL!	3	1	3
2	60	1	#NULL!	#NULL!	1	1	2	3	1	1	5	5	4	1	1	2	2	2	2	1	7	7	1	0	0	0	0	0	0	0	0	0	0	0	0	0	1	1	0	1	0	0	0	1	5	#NULL!	3	1	3
1	19	1	#NULL!	#NULL!	4	2	1	#NULL!	3	2	2	5	1	3	1	2	2	2	2	3	6	7	1	2	2	2	2	0	2	2	1	0	1	2	1	1	0	0	2	0	2	0	0	3	1	#NULL!	2	2	1
1	59	1	#NULL!	#NULL!	1	2	2	2	1	2	6	5	3	1	1	2	2	2	2	3	2	1	1	0	2	1	1	3	0	1	2	1	2	1	1	2	0	1	1	2	2	1	3	2	4	#NULL!	3	2	3
2	30	1	#NULL!	#NULL!	4	1	1	#NULL!	3	1	7	6	4	1	1	2	2	2	3	6	7	7	1	1	0	0	1	0	0	0	0	0	0	1	1	0	0	0	1	1	0	0	0	1	2	#NULL!	2	1	2
2	51	1	6	51	4	1	1	#NULL!	1	1	7	3	2	4	1	2	2	2	1	1	7	6	1	1	2	0	1	1	0	1	0	0	0	2	1	1	0	1	2	1	2	1	1	3	4	6	2	2	3
2	48	1	#NULL!	#NULL!	1	1	2	2	1	2	8	5	3	1	1	2	2	1	2	1	5	7	1	0	0	0	1	0	0	0	0	0	3	0	0	0	0	0	0	0	0	1	0	0	3	#NULL!	3	1	2
1	26	2	#NULL!	#NULL!	3	1	1	#NULL!	3	2	2	6	1	3	1	2	2	2	2	3	7	7	1	1	3	0	1	1	1	1	1	0	1	1	1	1	1	1	1	1	0	0	1	2	1	#NULL!	2	2	1
1	66	1	7	66	6	2	2	2	1	#NULL!	6	5	2	3	1	2	2	2	1	6	1	1	1	1	0	0	1	0	0	1	0	0	1	1	1	1	1	1	0	1	1	1	0	3	5	7	3	1	3
1	63	1	#NULL!	#NULL!	1	2	2	#NULL!	1	2	6	3	2	2	1	1	2	2	6	3	1	1	1	0	0	0	0	1	0	1	1	0	0	2	0	1	1	1	3	1	1	1	2	3	5	#NULL!	3	2	3
1	35	1	4	35	1	2	2	3	1	2	6	5	2	1	1	2	2	2	2	6	6	1	1	1	0	0	1	1	0	1	0	0	0	1	1	0	0	1	0	1	0	1	0	0	2	4	3	1	2
1	55	1	#NULL!	#NULL!	1	2	2	#NULL!	1	1	1	3	2	1	1	2	2	2	2	3	1	1	1	0	0	0	1	1	0	0	0	0	1	2	2	2	1	1	0	1	0	0	0	1	4	#NULL!	3	1	3
2	24	1	3	24	4	2	1	#NULL!	1	2	2	6	4	1	1	2	2	2	3	6	7	2	1	0	0	0	0	0	0	1	0	0	1	0	1	0	0	0	1	0	0	1	0	0	1	3	2	1	1
1	75	1	7	75	6	1	2	#NULL!	1	2	6	3	2	4	1	2	2	2	1	3	1	1	1	0	0	0	0	0	0	0	0	0	0	0	0	0	1	1	0	1	0	0	0	1	5	7	3	1	3
1	57	1	3	20	6	2	2	2	3	1	7	5	3	1	1	2	2	2	1	3	1	1	1	1	1	1	1	1	1	1	1	1	1	1	1	1	1	1	1	1	1	1	1	1	4	3	3	#NULL!	3
2	27	1	3	27	4	1	1	#NULL!	3	2	3	6	1	3	1	2	2	2	4	3	7	7	1	0	0	0	1	0	0	0	0	0	1	0	1	1	0	0	0	0	1	1	0	0	1	3	2	1	1
2	25	2	#NULL!	#NULL!	3	2	1	#NULL!	3	1	7	6	3	3	1	2	2	2	2	3	7	7	1	1	0	0	1	0	0	0	0	0	0	0	0	0	0	0	1	0	0	0	0	1	1	#NULL!	2	1	1
2	71	1	7	71	1	2	1	#NULL!	2	2	4	5	3	1	#NULL!	1	2	2	1	1	7	7	1	2	2	1	3	2	0	1	0	0	0	1	0	1	1	1	1	1	1	0	2	2	5	7	2	2	3
2	86	1	7	86	1	1	2	5	1	1	8	4	2	1	1	2	2	2	2	1	1	1	1	0	0	0	1	0	0	0	0	0	0	0	0	0	1	1	0	1	1	1	1	1	5	7	3	1	3
2	67	1	#NULL!	#NULL!	1	1	2	4	1	2	1	4	4	1	1	1	2	2	2	1	2	7	1	0	3	0	1	0	0	0	2	0	0	1	0	0	0	2	2	3	1	1	3	1	5	#NULL!	3	2	3
1	61	1	7	61	1	1	2	2	1	2	8	5	4	1	1	2	2	2	2	3	5	6	1	1	3	0	0	0	3	0	1	0	1	1	0	0	0	1	1	1	1	0	0	2	5	7	3	1	3
1	60	1	7	60	1	1	2	3	1	2	6	3	3	1	1	2	2	2	2	3	6	7	1	0	0	0	0	0	0	1	1	0	0	1	0	0	0	1	0	1	1	2	0	0	5	7	3	1	3
2	62	1	#NULL!	#NULL!	6	2	2	2	1	2	8	5	4	2	2	2	2	2	1	3	6	6	1	0	0	0	0	0	0	0	0	0	0	1	0	0	1	2	2	2	2	2	0	0	5	#NULL!	3	1	3
2	24	3	2	14	3	2	1	#NULL!	3	1	2	6	5	1	2	2	2	2	3	4	5	4	1	0	0	0	0	0	0	0	1	0	0	0	0	0	0	0	0	0	0	0	0	0	1	2	2	1	1
2	32	2	#NULL!	#NULL!	1	2	2	1	2	1	7	5	4	1	1	2	2	2	2	3	4	7	1	1	1	0	1	0	1	0	0	0	2	2	0	0	2	2	2	0	1	2	0	0	2	#NULL!	3	2	2
2	22	2	#NULL!	#NULL!	7	2	1	#NULL!	2	2	5	4	2	2	1	2	2	2	3	5	7	7	1	2	2	3	2	2	2	2	1	2	2	2	1	1	2	2	1	2	2	2	2	3	1	#NULL!	2	2	1
1	21	2	1	4	4	2	1	#NULL!	3	2	6	2	2	3	1	2	2	2	3	3	5	7	1	3	2	2	2	3	3	3	0	2	2	1	2	1	1	3	1	1	0	3	3	2	1	1	2	2	1
2	38	1	#NULL!	#NULL!	5	1	1	3	1	1	6	6	5	1	3	2	2	2	1	1	7	7	2	1	0	0	1	0	0	0	0	0	0	2	0	0	1	0	1	0	0	0	0	0	2	#NULL!	2	1	2
2	27	1	#NULL!	#NULL!	4	1	1	#NULL!	3	1	5	6	5	1	1	2	2	1	2	2	6	7	1	2	2	2	1	2	1	1	2	1	1	2	2	2	2	1	1	2	3	3	2	1	1	#NULL!	2	2	1
1	22	2	1	2	4	1	1	3	2	2	2	6	#NULL!	#NULL!	1	2	2	2	6	3	4	7	1	0	0	0	0	0	0	0	0	0	0	0	0	0	0	0	0	0	0	0	0	0	1	1	2	1	1
2	34	2	3	23	5	1	2	2	3	1	5	6	5	1	1	2	2	2	2	2	4	7	1	0	0	0	0	0	0	0	0	0	0	0	0	0	0	0	0	0	0	0	0	0	2	3	3	1	2
2	44	1	1	1	2	1	2	4	2	1	5	4	4	1	2	2	2	2	3	3	7	7	1	0	0	1	2	2	2	1	0	1	1	1	1	2	1	1	1	1	1	0	0	1	3	1	3	2	2
1	26	2	1	4	1	1	2	1	3	1	4	6	4	1	1	2	2	1	2	6	1	6	1	0	0	0	0	0	0	0	0	0	0	0	0	0	0	0	0	0	0	0	0	0	1	1	3	1	1
2	18	4	#NULL!	#NULL!	3	2	1	3	2	2	2	6	1	3	1	2	2	2	1	1	5	4	1	2	2	1	2	3	2	1	2	1	1	2	2	2	2	1	1	0	0	1	2	1	1	#NULL!	2	2	1
2	22	2	1	3	3	1	1	3	2	2	6	4	3	3	1	2	2	2	3	2	1	2	1	0	0	0	0	0	0	0	0	0	0	0	0	0	0	0	0	0	0	0	0	0	1	1	2	1	1
2	42	1	#NULL!	#NULL!	4	1	1	2	1	2	6	5	1	1	1	2	2	2	2	3	7	7	1	0	0	0	0	0	0	0	0	0	0	0	0	0	0	0	0	0	0	0	0	2	3	#NULL!	2	1	2
1	30	2	1	2	3	1	1	#NULL!	3	1	4	6	3	3	1	2	2	2	2	1	7	7	1	1	1	1	1	3	2	2	2	2	2	2	2	3	2	2	2	3	3	2	1	1	2	1	2	2	2
1	25	1	3	25	4	1	1	#NULL!	3	1	8	6	3	1	1	2	2	2	1	1	7	7	1	1	3	0	2	0	100	1	2	1	0	1	1	2	1	0	1	0	1	0	0	0	1	3	2	2	1
2	21	1	#NULL!	#NULL!	4	2	1	#NULL!	1	1	2	6	4	3	1	2	2	2	3	3	6	4	1	0	0	0	0	0	0	0	0	0	0	0	0	0	0	0	0	0	0	0	0	0	1	#NULL!	2	1	1
2	33	1	4	33	2	2	1	#NULL!	3	1	1	5	2	4	1	1	1	#NULL!	4	2	7	7	2	1	1	1	1	1	1	1	1	1	1	1	1	1	1	1	1	1	1	1	1	3	2	4	2	2	2
2	21	2	#NULL!	#NULL!	1	2	2	3	3	1	5	4	4	1	3	2	2	2	6	5	7	7	1	0	0	2	1	0	1	0	0	0	1	0	0	0	1	1	1	1	0	0	0	0	1	#NULL!	3	1	1
2	46	2	3	24	1	2	2	2	1	1	7	4	5	1	1	2	2	2	2	2	3	5	1	0	0	0	0	0	0	0	0	0	0	0	0	0	0	0	0	0	0	0	0	0	3	3	3	1	2
2	18	1	#NULL!	#NULL!	4	2	1	#NULL!	3	2	2	5	4	4	3	#NULL!	1	2	3	3	5	5	1	0	0	0	0	0	0	0	0	0	0	0	0	0	0	0	0	0	0	0	0	0	1	#NULL!	2	1	1
1	44	2	#NULL!	#NULL!	1	1	2	2	3	1	4	6	4	1	1	2	2	2	2	5	4	7	1	0	0	0	0	0	0	0	0	0	0	0	0	0	0	0	0	0	0	0	0	0	3	#NULL!	3	1	2
1	34	1	#NULL!	#NULL!	6	1	1	#NULL!	3	1	8	5	3	3	3	2	2	2	1	6	7	7	1	2	1	2	2	1	1	2	2	1	1	2	1	2	1	1	2	1	2	2	2	1	2	#NULL!	2	2	2
2	35	2	2	16	1	1	2	2	3	1	8	5	4	3	2	2	2	2	3	3	3	7	1	0	1	0	0	0	0	0	0	0	1	0	0	1	0	0	0	0	0	0	0	0	2	2	3	1	2
1	36	1	#NULL!	#NULL!	1	2	2	2	1	1	6	4	4	1	2	2	2	2	6	3	3	4	1	1	1	0	1	0	0	0	0	0	1	0	0	0	0	1	2	1	2	2	0	0	2	#NULL!	3	1	2
2	34	2	1	6	4	1	1	#NULL!	2	1	7	5	4	4	2	2	2	2	3	4	7	1	1	0	1	0	1	0	0	0	0	0	0	0	0	0	0	0	0	1	0	0	0	0	2	1	2	1	2
2	42	2	3	26	1	2	2	4	3	1	5	5	3	1	2	2	2	2	2	5	3	5	1	0	0	0	1	0	0	0	0	0	0	1	0	1	1	1	1	1	1	1	1	1	3	3	3	1	2
2	37	2	3	22	5	1	2	4	2	1	7	5	4	3	2	2	2	2	3	2	3	4	1	0	0	0	0	0	0	0	0	0	0	0	0	0	0	0	0	0	0	0	0	0	2	3	3	1	2
1	24	3	1	3	3	2	1	#NULL!	3	1	5	6	5	1	1	2	2	2	1	1	7	7	1	0	0	0	0	0	0	0	0	0	0	0	0	0	0	0	0	0	0	0	0	0	1	1	2	1	1
1	58	2	4	32	1	1	2	2	1	2	6	5	4	1	3	1	2	2	6	3	5	6	1	1	1	0	1	0	1	1	1	1	0	2	0	1	1	1	1	2	1	1	2	1	4	4	3	2	3
2	35	1	1	6	2	1	2	3	3	1	7	5	5	1	1	1	2	2	1	2	7	7	1	1	2	2	1	2	3	2	1	0	1	1	1	1	1	1	1	2	1	2	2	2	2	1	3	2	2
2	2	1	3	24	3	1	1	#NULL!	2	2	2	6	2	3	1	2	2	2	4	5	5	7	1	2	3	0	1	2	2	2	0	1	1	2	3	1	2	2	2	3	2	2	2	2	#NULL!	3	2	2	#NULL!
2	38	2	1	1	1	2	2	2	3	1	5	6	3	1	1	2	2	2	2	3	7	7	1	0	0	0	0	0	0	0	0	0	0	0	0	0	0	0	0	1	0	0	0	0	2	1	3	1	2
2	29	2	2	10	4	2	1	#NULL!	3	1	1	4	2	3	1	2	2	2	4	4	1	1	1	0	2	2	0	1	3	1	1	1	1	1	1	1	1	2	1	1	1	1	1	1	1	2	2	2	1
1	28	1	#NULL!	#NULL!	1	2	2	2	1	2	6	3	2	1	1	2	2	2	2	3	1	3	1	0	2	0	0	1	0	0	0	0	1	1	1	0	0	0	0	1	0	0	0	0	1	#NULL!	3	1	1
2	28	1	#NULL!	#NULL!	1	2	1	#NULL!	3	1	5	6	4	1	1	2	2	2	2	5	1	1	1	0	0	0	0	0	0	0	0	0	0	0	0	0	0	0	0	0	0	0	0	0	1	#NULL!	2	1	1
2	24	2	1	8	1	2	2	1	3	2	8	6	4	1	1	2	2	2	2	1	1	6	1	1	0	0	0	0	0	0	0	0	0	0	0	0	0	0	0	0	0	0	0	0	1	1	3	1	1
1	0	2	#NULL!	#NULL!	4	2	1	#NULL!	3	1	1	6	3	3	1	2	2	1	1	3	1	3	1	1	3	0	2	0	0	2	2	0	1	3	2	1	1	1	0	1	0	3	0	1	#NULL!	#NULL!	2	2	#NULL!
1	34	2	1	1	1	2	1	#NULL!	3	1	8	6	3	3	1	2	2	2	2	6	7	6	1	0	0	0	0	0	0	0	0	0	1	0	0	0	0	0	0	0	0	0	0	0	2	1	2	1	2
1	43	1	#NULL!	#NULL!	1	2	2	2	3	1	7	6	4	1	1	2	2	2	2	1	7	7	1	1	3	0	1	1	3	1	1	0	3	1	1	0	2	1	1	1	0	3	0	0	3	#NULL!	3	2	2
1	25	1	#NULL!	#NULL!	3	2	1	#NULL!	3	1	2	6	3	4	1	2	2	2	3	2	3	7	1	1	3	0	3	0	0	1	0	0	0	1	1	1	1	1	1	1	1	0	1	1	1	#NULL!	2	2	1
2	48	1	#NULL!	#NULL!	1	2	2	3	3	1	4	6	3	1	1	2	2	2	2	2	7	7	1	0	0	0	0	0	0	0	0	0	0	0	0	0	0	0	0	0	0	0	0	0	3	#NULL!	3	1	2
1	33	2	3	20	1	2	2	1	3	1	1	4	2	4	1	2	2	2	2	2	1	1	1	1	1	1	1	1	1	1	1	1	1	1	1	1	1	1	1	1	1	1	1	1	2	3	3	2	2
2	39	1	1	1	4	2	1	#NULL!	2	1	4	6	3	3	2	2	2	2	1	3	7	7	1	0	0	0	0	0	0	0	1	0	1	1	0	1	1	1	1	1	1	1	1	1	2	1	2	1	2
2	33	1	#NULL!	#NULL!	1	2	2	2	3	1	4	6	4	1	2	2	2	2	2	3	7	7	1	0	1	0	1	1	0	1	0	0	0	0	0	0	0	0	0	0	0	0	0	0	2	#NULL!	3	1	2
2	37	2	2	10	6	2	2	3	2	2	1	5	2	4	2	2	2	2	2	3	3	4	1	2	1	0	0	3	2	1	1	1	1	3	2	2	2	2	2	3	2	2	1	0	2	2	3	2	2
2	35	1	1	2	2	2	2	3	1	2	6	5	1	1	2	2	2	2	2	5	7	7	2	3	3	3	3	3	3	3	3	3	3	3	3	3	3	3	3	3	3	0	1	1	2	1	3	2	2
1	33	1	#NULL!	#NULL!	3	1	1	#NULL!	3	1	5	6	4	3	2	2	2	2	2	3	7	3	1	0	0	0	0	0	0	0	0	0	0	0	0	0	0	0	0	0	0	0	0	0	2	#NULL!	2	1	2
1	30	1	#NULL!	#NULL!	5	2	2	1	#NULL!	2	1	5	3	4	1	2	2	2	1	2	7	7	1	1	2	1	1	1	1	1	1	1	1	1	2	1	2	2	2	1	1	3	1	2	2	#NULL!	3	2	2
2	34	2	2	15	1	2	2	1	1	1	7	6	5	1	1	2	2	2	6	2	3	7	1	0	0	0	0	0	0	0	0	0	0	0	0	0	0	0	0	0	0	0	0	0	2	2	3	1	2
2	27	1	1	1	2	2	1	3	1	2	5	5	4	2	1	2	2	2	2	5	7	7	1	2	2	1	1	2	2	2	2	2	2	3	2	2	2	1	1	2	2	3	2	1	1	1	2	2	1
2	23	2	1	2	4	1	1	#NULL!	3	2	2	6	1	3	1	2	2	2	1	2	5	1	1	0	2	2	2	1	1	0	1	2	1	2	1	2	1	2	2	2	2	2	2	0	1	1	2	2	1
1	27	1	1	2	1	2	2	3	1	1	6	1	3	1	2	2	2	2	1	2	3	3	1	3	1	1	0	0	0	1	2	1	1	2	1	3	2	1	2	2	2	1	0	0	1	1	3	2	1
2	28	1	3	28	3	2	1	3	1	2	6	2	2	1	2	2	1	1	1	4	7	7	1	2	1	2	1	2	1	1	1	1	1	1	1	1	1	1	1	1	1	1	1	1	1	3	2	2	1
1	26	2	1	5	4	2	1	#NULL!	3	1	2	2	3	3	1	2	2	2	4	3	2	7	1	3	3	3	3	3	3	3	3	3	3	3	3	3	3	3	3	3	3	3	3	3	1	1	2	2	1
1	23	2	1	3	3	2	1	#NULL!	3	1	2	6	2	3	1	2	2	2	4	5	1	1	1	0	0	0	0	0	0	0	0	0	0	0	0	0	0	0	0	0	0	0	0	0	1	1	2	1	1
2	24	1	#NULL!	#NULL!	4	2	1	#NULL!	2	2	2	6	4	1	2	2	2	2	3	3	6	2	1	0	0	0	0	0	0	0	0	0	0	0	0	0	0	0	0	0	0	0	0	0	1	#NULL!	2	1	1
2	25	2	1	2	2	2	1	#NULL!	3	2	2	6	3	3	2	2	2	2	2	3	4	7	1	0	0	0	0	0	0	0	0	0	0	0	0	0	0	0	0	0	0	0	0	0	1	1	2	1	1
1	26	2	1	2	4	1	1	#NULL!	3	1	2	6	2	3	1	2	2	2	4	2	4	3	1	0	0	0	0	0	0	0	0	0	0	0	0	0	0	0	0	0	0	0	0	0	1	1	2	1	1
1	27	2	1	5	4	1	1	#NULL!	3	2	2	6	4	3	2	2	2	2	2	3	7	1	1	0	0	0	0	0	0	0	0	0	0	0	0	0	0	0	0	0	0	0	0	0	1	1	2	1	1
2	26	1	#NULL!	#NULL!	2	2	1	#NULL!	3	1	2	6	4	1	3	2	2	2	2	2	6	5	1	0	0	0	0	0	0	0	0	0	0	0	0	0	0	0	0	0	0	0	0	0	1	#NULL!	2	1	1
1	22	1	#NULL!	#NULL!	4	#NULL!	1	#NULL!	3	2	2	5	4	1	1	2	2	2	3	1	7	7	1	0	0	0	1	1	1	0	0	0	0	1	1	1	0	0	1	1	1	0	0	0	#NULL!	#NULL!	#NULL!	1	1
2	24	1	#NULL!	#NULL!	4	#NULL!	1	#NULL!	1	2	2	6	3	4	1	2	2	2	3	3	7	7	1	2	0	1	1	2	1	1	1	0	1	0	3	3	2	2	0	1	0	0	1	1	#NULL!	#NULL!	#NULL!	2	1
2	20	2	1	8	4	#NULL!	1	#NULL!	3	2	2	6	4	4	1	2	2	2	3	3	2	1	1	0	0	2	0	1	3	3	0	2	2	2	0	2	0	1	2	2	1	3	0	2	#NULL!	1	#NULL!	2	1
2	23	2	1	1	4	#NULL!	1	#NULL!	3	2	2	6	2	3	1	2	2	2	4	5	1	1	1	1	0	0	1	0	0	0	0	0	0	1	0	1	0	0	0	0	0	0	0	0	#NULL!	1	#NULL!	1	1
1	31	2	3	24	1	#NULL!	1	#NULL!	1	2	3	4	3	3	2	2	2	2	2	2	7	7	1	0	0	0	0	1	0	2	3	0	3	0	0	0	3	0	0	0	0	0	0	1	#NULL!	3	#NULL!	1	2
1	37	2	2	12	2	#NULL!	1	#NULL!	2	1	8	5	3	3	1	2	2	2	1	2	6	1	1	0	0	0	1	0	0	1	1	0	2	0	0	1	1	0	1	0	0	0	0	0	#NULL!	2	#NULL!	1	2
1	33	1	#NULL!	#NULL!	3	#NULL!	1	#NULL!	2	2	3	6	3	4	2	2	2	2	3	2	7	7	1	1	1	1	1	1	1	1	2	0	2	2	3	0	2	2	3	2	3	0	0	0	#NULL!	#NULL!	#NULL!	2	2
1	20	2	2	15	4	#NULL!	1	#NULL!	3	2	3	5	3	3	2	2	2	2	3	2	1	7	1	0	0	0	1	0	0	0	1	0	1	1	1	1	0	0	1	1	0	0	1	0	#NULL!	2	#NULL!	1	1
1	23	1	#NULL!	#NULL!	2	#NULL!	1	#NULL!	3	2	2	6	1	4	3	2	2	1	2	6	6	1	1	3	3	0	3	3	100	3	1	1	2	2	3	3	1	3	3	3	2	0	1	1	#NULL!	#NULL!	#NULL!	2	1
1	19	1	#NULL!	#NULL!	4	#NULL!	1	#NULL!	3	2	2	5	3	3	1	2	2	2	3	5	1	1	1	0	1	0	0	0	0	0	0	0	0	0	0	1	0	1	0	0	0	0	0	0	#NULL!	#NULL!	#NULL!	1	1
1	19	2	2	12	4	#NULL!	1	#NULL!	3	2	2	5	3	3	3	2	1	1	3	1	1	1	1	0	0	0	1	0	0	0	0	0	0	0	0	0	0	0	1	0	0	0	0	0	#NULL!	2	#NULL!	1	1
1	18	2	2	13	4	#NULL!	1	#NULL!	2	2	2	5	3	3	1	2	2	2	3	2	1	1	1	0	0	0	0	0	0	0	0	0	0	0	0	0	0	0	0	0	1	1	0	0	#NULL!	2	#NULL!	1	1
1	19	2	1	3	2	#NULL!	1	#NULL!	3	2	2	6	2	3	1	2	2	2	3	6	7	1	1	0	1	3	2	0	3	2	0	0	2	3	0	1	2	1	1	3	2	1	0	0	#NULL!	1	#NULL!	2	1
1	19	1	#NULL!	#NULL!	4	#NULL!	1	#NULL!	2	2	2	5	3	3	1	2	2	2	3	3	1	1	1	0	0	0	0	0	0	0	0	0	0	0	0	0	0	0	0	0	0	0	0	0	#NULL!	#NULL!	#NULL!	1	1
1	19	1	#NULL!	#NULL!	4	#NULL!	1	#NULL!	2	2	2	5	3	3	1	2	2	2	3	3	1	1	1	0	0	0	0	0	0	0	0	0	0	0	0	0	0	0	0	0	0	0	0	0	#NULL!	#NULL!	#NULL!	1	1
1	27	1	#NULL!	#NULL!	4	#NULL!	1	#NULL!	2	1	4	6	3	3	1	2	2	2	2	3	7	1	1	0	0	0	0	0	0	0	0	0	0	0	0	0	0	0	0	0	0	0	0	0	#NULL!	#NULL!	#NULL!	1	1
1	25	2	3	23	6	2	2	1	3	2	6	3	2	3	1	2	1	2	3	5	4	7	1	1	1	1	3	3	1	2	2	1	2	2	2	1	0	1	1	1	2	2	2	3	2	3	#NULL!	2	1
1	18	2	1	9	4	#NULL!	1	#NULL!	3	1	2	5	3	1	2	2	2	2	3	2	1	1	1	0	0	0	1	0	1	0	1	0	3	1	0	0	0	0	1	1	1	0	0	0	#NULL!	1	#NULL!	1	1
1	42	2	5	40	1	4	2	3	2	2	6	5	3	1	3	2	1	1	2	3	1	1	1	1	0	1	1	0	0	0	0	0	1	0	0	1	1	1	0	1	0	0	2	0	4	5	#NULL!	1	2
1	58	1	#NULL!	#NULL!	1	#NULL!	1	#NULL!	3	2	6	4	4	1	1	2	2	2	2	2	7	7	1	1	0	0	0	1	0	0	1	0	0	0	0	1	0	0	0	0	0	0	0	0	#NULL!	#NULL!	#NULL!	1	3
2	47	1	#NULL!	#NULL!	6	3	2	2	3	1	5	6	4	1	1	2	2	2	1	5	7	1	1	0	0	0	1	0	0	0	0	0	1	0	0	0	0	0	0	0	0	1	0	1	3	#NULL!	#NULL!	1	2
2	48	2	4	30	1	5	2	4	3	1	1	4	2	3	1	2	2	2	2	3	7	7	1	0	0	0	0	0	0	0	0	0	0	0	0	0	0	0	0	0	0	0	0	0	5	4	#NULL!	1	2
2	44	1	#NULL!	#NULL!	1	3	2	2	3	1	4	6	3	1	1	2	2	2	2	5	7	7	1	0	0	0	3	0	0	0	0	0	0	1	0	0	0	0	0	0	0	0	0	0	3	#NULL!	#NULL!	1	2
1	41	1	#NULL!	#NULL!	4	#NULL!	1	#NULL!	2	1	4	5	2	4	1	2	2	2	3	1	5	5	1	1	2	3	2	1	2	3	2	3	1	3	1	1	1	0	1	2	1	1	0	3	#NULL!	#NULL!	#NULL!	2	2
1	42	1	#NULL!	#NULL!	1	3	2	2	3	1	4	6	3	1	1	2	2	2	2	5	7	7	1	0	0	0	0	0	0	0	0	0	0	0	0	0	0	0	0	0	0	0	0	0	3	#NULL!	#NULL!	1	2
1	43	1	#NULL!	#NULL!	5	#NULL!	1	#NULL!	3	1	5	6	5	4	3	2	1	1	4	6	7	7	1	1	0	0	3	0	0	0	1	0	1	1	0	1	1	2	2	1	0	0	2	0	#NULL!	#NULL!	#NULL!	1	2
2	69	1	#NULL!	#NULL!	1	6	2	5	3	1	8	6	3	1	1	2	2	2	2	3	1	3	1	0	0	0	0	0	0	0	0	0	1	0	0	0	1	1	0	1	1	0	0	2	6	#NULL!	#NULL!	1	3
1	54	1	#NULL!	#NULL!	1	3	2	2	3	1	4	6	3	1	1	2	2	2	2	5	7	7	1	0	0	0	0	0	0	0	0	0	0	3	0	0	0	1	0	0	0	0	0	0	3	#NULL!	#NULL!	1	3
1	50	1	#NULL!	#NULL!	5	#NULL!	1	#NULL!	3	1	4	5	4	1	1	2	2	2	3	4	5	7	1	1	2	1	0	1	0	1	0	0	1	3	0	1	1	1	0	1	1	0	1	2	#NULL!	#NULL!	#NULL!	2	3
2	53	2	3	20	1	3	2	2	3	1	5	5	3	3	1	2	2	2	2	3	7	7	1	0	0	0	0	0	0	0	0	0	0	0	0	0	0	0	0	0	0	0	0	0	3	3	#NULL!	1	3
2	59	2	4	30	6	4	2	3	2	2	8	5	3	2	1	1	2	2	1	5	7	1	1	1	2	0	2	0	0	0	0	0	0	1	1	0	0	1	1	1	1	1	2	0	4	4	#NULL!	1	3
2	57	1	#NULL!	#NULL!	1	2	2	1	1	2	8	5	3	1	1	2	2	2	2	5	7	7	1	0	0	0	0	0	0	0	0	0	0	0	0	0	0	0	0	0	0	0	0	0	2	#NULL!	#NULL!	1	3
1	60	4	3	28	1	2	2	1	3	1	4	6	4	1	1	2	2	2	2	2	7	1	1	0	0	0	0	0	0	0	0	0	0	0	0	0	0	0	0	0	0	0	0	0	2	3	#NULL!	1	3
2	22	2	1	1	3	#NULL!	1	#NULL!	2	2	2	6	2	1	1	2	2	2	4	5	7	7	1	1	0	0	2	0	0	0	0	0	1	1	1	0	0	1	1	2	0	0	0	2	#NULL!	1	#NULL!	1	1
2	40	2	3	25	2	#NULL!	1	#NULL!	1	1	7	3	2	4	2	2	2	2	2	5	3	7	1	1	1	3	3	1	3	2	2	3	2	2	2	2	2	2	2	2	2	3	3	2	#NULL!	3	#NULL!	2	2
1	22	2	1	3	3	#NULL!	1	#NULL!	2	2	2	6	3	2	1	2	2	2	1	5	4	7	1	0	3	2	1	2	3	1	0	2	1	2	2	1	1	2	2	1	1	1	0	2	#NULL!	1	#NULL!	2	1
2	23	2	1	4	4	#NULL!	1	#NULL!	3	2	2	6	3	4	1	2	2	2	3	5	7	7	1	0	0	0	0	0	0	0	0	0	0	0	0	0	0	0	0	0	0	0	0	0	#NULL!	1	#NULL!	1	1
1	23	2	1	4	4	#NULL!	1	#NULL!	3	2	2	6	3	4	1	2	2	2	1	5	3	7	1	1	0	0	0	1	1	0	0	0	0	0	1	0	1	0	1	0	1	0	1	0	#NULL!	1	#NULL!	1	1
1	58	2	6	50	6	3	2	2	1	2	6	3	2	1	2	1	2	2	1	5	1	1	1	2	2	1	2	2	2	1	2	1	2	2	1	2	2	2	2	2	2	1	2	3	3	6	#NULL!	2	3
1	19	2	1	1	4	#NULL!	1	#NULL!	3	2	2	6	4	4	2	2	2	2	1	5	3	7	1	0	0	0	1	0	0	0	1	0	0	0	1	0	0	0	0	0	0	0	0	0	#NULL!	1	#NULL!	1	1
2	65	2	5	45	6	5	2	4	2	2	3	4	2	2	2	1	2	2	6	5	7	7	1	1	2	2	1	1	1	2	2	1	1	1	2	1	1	2	1	1	2	2	2	3	5	5	#NULL!	2	3
1	68	2	6	50	6	3	2	2	1	2	8	3	1	2	1	1	2	2	1	5	2	7	1	1	2	2	2	2	2	2	2	1	1	1	2	2	2	3	3	3	3	1	3	3	3	6	#NULL!	2	3
1	44	2	4	30	1	4	2	3	2	1	4	3	3	1	2	2	2	2	2	5	1	1	1	2	1	1	1	1	2	1	2	1	1	1	1	2	2	2	1	1	2	1	1	1	4	4	#NULL!	2	2
2	54	2	5	40	6	5	2	4	2	2	7	4	2	1	2	2	2	2	1	5	7	7	1	2	2	3	2	2	1	2	1	1	2	2	2	2	2	2	2	2	2	1	2	2	5	5	#NULL!	2	3
1	55	2	5	40	6	5	2	4	2	2	8	3	3	1	1	2	2	2	6	5	2	1	1	2	2	2	2	2	1	2	2	1	2	2	2	2	2	2	2	2	1	2	2	3	5	5	#NULL!	2	3
2	18	1	#NULL!	#NULL!	4	#NULL!	1	#NULL!	1	1	2	5	3	4	1	2	2	2	3	1	2	1	1	0	0	0	0	0	0	0	0	0	1	0	0	0	0	0	0	0	0	2	0	0	#NULL!	#NULL!	#NULL!	1	1
2	18	1	#NULL!	#NULL!	4	#NULL!	1	#NULL!	1	2	2	5	4	4	3	2	2	2	3	1	2	1	1	0	0	0	0	0	0	0	0	0	0	0	0	0	0	0	0	0	1	1	0	1	#NULL!	#NULL!	#NULL!	1	1
2	19	2	2	14	4	#NULL!	1	#NULL!	3	2	2	5	4	3	3	2	2	2	3	2	7	1	1	1	2	3	1	1	0	0	0	0	0	0	0	0	0	0	0	0	0	3	2	0	#NULL!	2	#NULL!	1	1
2	73	1	#NULL!	#NULL!	1	4	2	3	1	2	8	6	2	1	3	2	2	2	2	1	7	7	1	0	0	0	0	0	0	0	0	0	0	0	0	0	0	0	0	0	0	0	0	0	4	#NULL!	#NULL!	1	3
1	44	1	#NULL!	#NULL!	1	3	2	2	2	1	8	6	4	4	3	2	2	2	2	1	5	5	1	0	0	0	0	0	0	0	0	0	0	1	0	0	0	0	0	0	0	2	0	0	3	#NULL!	#NULL!	1	2
2	47	2	2	11	1	4	2	3	3	1	1	3	2	1	3	2	2	2	2	1	1	7	1	0	0	0	0	0	0	0	0	0	0	0	0	0	0	0	0	0	0	0	0	0	4	2	#NULL!	1	2
2	30	2	1	5	4	#NULL!	1	#NULL!	3	1	1	5	2	1	1	2	2	2	1	1	5	7	1	1	1	0	1	1	1	1	1	1	1	0	1	0	0	0	0	1	2	3	0	0	#NULL!	1	#NULL!	1	2
2	31	2	3	20	1	#NULL!	1	#NULL!	3	1	5	4	3	1	3	2	2	2	2	3	2	1	1	0	0	0	0	0	0	0	0	0	0	0	0	0	0	1	0	0	0	3	0	0	#NULL!	3	#NULL!	1	2
1	20	1	#NULL!	#NULL!	4	#NULL!	1	#NULL!	1	2	2	6	2	1	2	2	2	2	3	1	2	1	1	0	0	0	0	0	0	0	0	0	0	0	0	0	0	0	3	0	0	0	0	0	#NULL!	#NULL!	#NULL!	1	1
2	18	2	1	2	3	#NULL!	1	#NULL!	3	1	1	4	2	1	1	2	2	2	1	1	2	3	1	0	0	0	0	0	0	0	0	0	3	0	0	0	0	0	0	0	0	0	0	0	#NULL!	1	#NULL!	1	1
2	31	1	#NULL!	#NULL!	4	#NULL!	1	#NULL!	3	1	1	6	2	1	1	2	2	2	1	4	2	1	1	0	0	0	0	0	0	0	0	0	0	0	0	0	0	0	0	0	0	0	0	0	#NULL!	#NULL!	#NULL!	1	2
1	67	1	#NULL!	#NULL!	6	6	2	5	2	2	6	3	2	2	2	1	1	1	3	1	1	1	1	0	0	0	1	0	0	0	0	0	1	0	1	0	1	1	0	1	0	0	0	3	6	#NULL!	#NULL!	1	3
1	50	1	#NULL!	#NULL!	1	3	2	2	1	1	8	5	2	3	2	2	2	2	2	2	7	1	1	0	0	0	0	0	0	0	0	0	0	3	0	0	0	0	1	0	0	3	0	0	3	#NULL!	#NULL!	1	3
2	18	1	#NULL!	#NULL!	4	#NULL!	1	#NULL!	3	2	2	5	1	1	3	2	2	2	3	2	5	1	1	1	0	0	1	1	1	0	1	0	1	2	0	2	0	0	1	2	1	0	0	0	#NULL!	#NULL!	#NULL!	1	1
1	62	1	#NULL!	#NULL!	1	3	2	2	2	1	7	5	2	4	3	2	2	2	2	1	1	1	1	0	0	0	0	0	0	0	1	0	3	0	0	0	0	1	2	1	0	3	0	2	3	#NULL!	#NULL!	1	3
1	45	1	#NULL!	#NULL!	1	4	2	3	3	2	8	6	4	4	1	1	2	2	6	4	1	1	1	0	0	0	0	0	0	0	0	0	0	0	0	0	0	0	0	0	0	0	0	0	4	#NULL!	#NULL!	1	2
1	27	1	#NULL!	#NULL!	2	#NULL!	1	#NULL!	3	2	2	6	5	4	3	2	2	2	3	3	1	1	1	0	0	0	0	0	0	0	0	0	0	0	0	0	0	0	0	0	0	0	0	0	#NULL!	#NULL!	#NULL!	1	1
2	33	1	#NULL!	#NULL!	2	#NULL!	1	#NULL!	3	1	8	6	4	4	3	2	2	2	3	3	7	7	1	0	0	0	0	0	0	0	0	0	0	0	0	0	0	0	0	0	0	0	0	0	#NULL!	#NULL!	#NULL!	1	2
1	38	1	#NULL!	#NULL!	1	#NULL!	1	#NULL!	3	2	6	5	4	1	3	2	2	2	2	3	1	1	1	0	0	0	0	0	0	0	0	0	0	0	0	0	0	0	0	0	0	0	0	0	#NULL!	#NULL!	#NULL!	1	2
2	36	3	1	7	2	#NULL!	1	#NULL!	3	1	8	6	5	4	3	2	2	2	2	1	7	7	1	0	0	0	0	0	0	0	0	0	0	0	0	0	0	0	0	0	0	0	0	0	#NULL!	1	#NULL!	1	2
2	32	3	#NULL!	#NULL!	3	#NULL!	1	#NULL!	3	1	4	6	3	1	3	2	2	2	1	2	7	1	1	3	0	0	1	3	0	0	0	0	2	0	1	1	1	1	1	0	0	0	0	0	#NULL!	#NULL!	#NULL!	1	2
1	32	2	1	8	1	2	2	1	3	1	4	6	4	3	1	2	2	2	2	5	1	1	1	0	0	0	0	0	0	0	0	0	0	0	0	0	0	0	0	0	0	1	0	1	2	1	#NULL!	1	2
2	38	2	2	12	4	#NULL!	1	#NULL!	3	1	5	5	3	1	3	2	2	2	1	5	7	1	1	1	1	0	1	0	0	0	0	0	1	1	1	1	0	1	1	0	1	0	0	0	#NULL!	2	#NULL!	1	2
2	49	1	#NULL!	#NULL!	1	3	2	2	2	2	3	5	2	1	1	1	2	2	2	2	5	7	1	1	1	0	3	0	3	1	0	0	1	0	0	1	1	2	1	1	2	2	1	0	3	#NULL!	#NULL!	2	2
2	43	4	3	24	1	2	2	1	2	1	7	6	3	1	1	2	2	2	2	3	1	1	1	1	0	0	1	0	0	2	0	0	0	3	0	0	0	0	0	0	0	0	0	0	2	3	#NULL!	1	2
1	49	1	#NULL!	#NULL!	1	3	2	2	2	1	5	3	4	1	3	2	2	2	2	3	1	1	1	0	1	0	0	0	0	0	0	0	0	0	0	0	0	0	0	0	0	0	0	0	3	#NULL!	#NULL!	1	2
2	49	2	3	23	1	3	2	2	2	2	7	3	3	3	3	2	2	2	2	5	4	1	1	0	0	0	0	0	0	0	0	0	0	1	0	0	0	0	0	0	0	0	0	0	3	3	#NULL!	1	2
2	40	2	1	9	1	#NULL!	1	#NULL!	1	1	5	4	3	3	3	2	2	2	2	3	5	1	1	1	1	1	0	1	0	0	0	0	1	1	1	0	0	0	0	0	0	0	0	0	#NULL!	1	#NULL!	1	2
2	48	1	#NULL!	#NULL!	4	#NULL!	1	#NULL!	3	1	4	4	2	4	2	2	2	2	3	4	6	6	1	1	1	0	1	1	0	0	0	1	1	0	1	1	1	0	0	0	0	1	0	0	#NULL!	#NULL!	#NULL!	1	2
2	47	1	#NULL!	#NULL!	1	3	2	2	2	1	4	4	3	1	3	2	2	1	1	1	1	1	1	0	1	0	0	1	3	0	0	0	0	1	0	0	0	0	0	0	0	0	0	0	3	#NULL!	#NULL!	1	2
1	41	2	2	15	1	2	2	1	3	1	6	5	2	3	1	2	2	2	2	5	1	7	1	0	0	0	0	0	0	0	0	0	0	0	0	0	0	0	0	0	0	0	0	0	2	2	#NULL!	1	2
1	30	4	1	6	1	#NULL!	1	#NULL!	1	2	3	5	2	4	1	2	2	2	6	3	1	7	1	0	0	0	0	0	0	0	0	0	0	0	0	0	0	0	0	0	0	0	0	0	#NULL!	1	#NULL!	1	2
1	36	1	#NULL!	#NULL!	1	3	2	2	3	1	5	5	3	1	1	2	2	1	2	3	4	6	1	1	0	0	1	1	1	0	0	1	1	1	1	1	1	1	1	1	3	3	2	0	3	#NULL!	#NULL!	2	2
1	37	1	#NULL!	#NULL!	1	3	2	2	3	1	5	6	4	4	3	2	2	2	2	3	5	1	1	0	0	0	0	0	0	0	0	0	0	0	0	0	0	1	0	0	0	3	0	0	3	#NULL!	#NULL!	1	2
1	30	2	3	26	1	3	2	2	2	2	6	4	2	3	2	2	1	2	2	3	3	7	1	1	1	1	3	1	3	1	2	1	2	1	2	2	3	1	0	2	1	3	2	1	3	3	#NULL!	2	2
1	37	1	#NULL!	#NULL!	1	3	2	2	2	1	5	5	4	4	3	2	2	2	2	3	3	1	1	1	1	0	0	0	0	0	0	0	0	0	0	0	0	0	0	1	0	0	1	0	3	#NULL!	#NULL!	1	2
1	32	1	#NULL!	#NULL!	1	#NULL!	1	#NULL!	2	2	6	3	1	4	3	2	2	2	6	5	1	7	1	2	1	0	1	0	0	0	0	0	0	1	2	3	0	0	1	2	2	1	3	2	#NULL!	#NULL!	#NULL!	2	2
1	34	2	3	22	5	3	2	2	2	2	3	2	2	1	3	1	2	2	6	5	1	7	1	0	0	0	0	0	0	0	0	0	0	0	0	0	0	0	1	1	1	0	0	0	3	3	#NULL!	1	2
1	32	2	2	16	1	3	2	2	2	1	1	5	3	3	1	2	2	2	2	1	4	7	1	0	0	0	0	0	0	0	0	0	1	0	0	1	0	0	0	1	0	0	0	0	3	2	#NULL!	1	2
1	72	1	#NULL!	#NULL!	1	5	1	4	2	2	6	4	3	2	2	2	2	2	1	2	1	2	1	0	0	0	0	0	0	0	0	0	0	0	0	0	0	1	0	0	0	3	0	0	5	#NULL!	#NULL!	1	3
1	39	1	#NULL!	#NULL!	1	3	2	2	3	1	1	4	2	3	1	2	2	2	6	3	1	7	1	0	3	2	0	1	0	0	1	0	3	3	1	3	0	0	3	0	0	0	3	3	3	#NULL!	#NULL!	2	2
1	40	1	#NULL!	#NULL!	1	5	2	4	3	2	6	1	2	4	3	1	2	2	2	3	1	1	1	1	3	3	3	0	0	0	0	0	2	1	0	1	0	2	3	3	2	2	3	0	5	#NULL!	#NULL!	2	2
1	49	2	3	23	6	5	2	4	2	2	6	1	1	3	1	2	2	2	5	2	1	1	1	1	2	2	2	3	2	2	3	1	3	0	0	0	0	2	1	0	0	1	0	0	5	3	#NULL!	2	2
1	43	2	3	25	1	3	2	2	2	2	6	4	2	1	3	2	2	2	6	5	3	7	1	1	1	2	1	1	1	2	3	2	2	2	0	1	1	3	0	2	0	1	1	3	3	3	#NULL!	2	2
2	63	2	5	41	1	5	2	4	2	1	8	3	3	2	2	1	2	2	2	1	7	7	1	0	0	0	1	0	0	1	0	1	0	0	0	0	0	0	0	0	0	1	0	0	5	5	#NULL!	1	3
2	62	2	5	42	1	3	2	2	2	1	7	4	3	2	3	1	2	2	2	1	2	7	1	0	1	0	0	0	1	0	1	0	0	0	0	0	0	1	1	1	0	0	0	0	3	5	#NULL!	1	3
1	63	1	#NULL!	#NULL!	1	4	2	3	1	2	8	4	3	2	2	1	2	2	2	3	1	1	1	0	0	1	0	0	0	0	0	0	0	0	1	0	0	1	1	1	0	1	1	1	4	#NULL!	#NULL!	1	3
2	57	1	#NULL!	#NULL!	1	3	2	2	2	2	8	4	3	2	2	1	2	2	2	3	4	4	1	1	0	0	0	0	0	0	0	0	0	0	0	0	0	1	0	1	0	0	0	1	3	#NULL!	#NULL!	1	3
2	60	1	#NULL!	#NULL!	1	3	2	2	2	1	7	4	3	2	2	2	2	2	6	4	7	7	1	0	0	0	0	0	0	0	0	0	0	0	0	0	0	1	0	1	0	0	0	0	3	#NULL!	#NULL!	1	3
2	62	2	5	40	1	4	2	3	1	1	7	4	3	1	3	2	2	2	2	3	1	1	1	0	0	0	0	0	0	0	0	0	0	0	0	0	0	0	0	0	0	0	0	0	4	5	#NULL!	1	3
1	72	1	#NULL!	#NULL!	1	3	2	2	1	2	4	5	3	4	3	2	2	2	2	3	7	2	1	0	0	0	1	1	0	0	0	0	1	0	0	1	0	0	1	1	0	1	1	0	3	#NULL!	#NULL!	1	3
1	54	1	#NULL!	#NULL!	1	3	2	2	1	1	5	4	3	2	2	2	2	1	2	3	1	7	1	1	1	0	1	0	0	0	0	0	1	0	1	1	0	1	1	1	0	0	1	1	3	#NULL!	#NULL!	1	3
1	58	1	#NULL!	#NULL!	1	3	2	2	2	2	6	2	3	2	2	1	2	2	2	4	4	1	1	1	1	0	1	0	0	0	0	0	1	0	0	0	0	0	1	0	0	0	1	1	3	#NULL!	#NULL!	1	3
1	56	1	#NULL!	#NULL!	1	3	2	2	3	1	8	6	4	1	1	2	2	2	2	1	2	6	1	0	1	0	1	0	0	0	1	0	1	0	0	1	1	1	0	1	0	1	0	0	3	#NULL!	#NULL!	1	3
1	52	2	1	5	1	3	2	2	3	2	6	3	3	1	3	2	2	2	6	5	1	1	1	0	0	0	1	0	0	0	0	0	1	0	0	0	0	0	0	1	0	0	0	1	3	1	#NULL!	1	3
2	52	2	5	41	4	#NULL!	1	#NULL!	1	1	1	3	2	2	2	2	2	2	3	3	7	7	1	0	0	0	0	0	0	0	0	0	0	0	0	0	0	1	0	1	0	0	1	0	#NULL!	5	#NULL!	1	3
2	56	2	5	41	1	4	2	3	2	1	7	3	4	1	3	2	2	2	2	2	7	7	1	1	1	0	0	0	0	0	0	0	0	0	0	0	0	0	0	0	0	0	0	0	4	5	#NULL!	1	3
2	54	1	#NULL!	#NULL!	4	#NULL!	1	#NULL!	2	2	3	6	4	4	3	2	2	2	1	3	7	7	1	0	0	0	0	0	0	0	0	0	0	0	0	0	0	0	0	0	0	0	0	0	#NULL!	#NULL!	#NULL!	1	3
2	59	2	5	40	1	4	2	3	2	1	7	5	3	1	2	2	2	2	2	1	2	1	1	0	0	0	0	0	0	0	0	0	0	0	0	0	0	0	0	0	0	0	0	0	4	5	#NULL!	1	3
2	57	1	#NULL!	#NULL!	1	3	2	2	2	1	7	5	3	1	3	2	2	2	2	1	6	7	1	0	0	0	0	0	0	0	0	0	0	0	0	0	1	0	1	1	0	0	0	0	3	#NULL!	#NULL!	1	3
2	19	1	#NULL!	#NULL!	4	#NULL!	1	#NULL!	1	1	5	6	4	1	2	2	2	2	3	3	4	1	1	0	1	0	1	0	0	0	0	0	0	0	1	0	0	0	1	0	0	0	0	0	#NULL!	#NULL!	#NULL!	1	1
2	24	1	#NULL!	#NULL!	4	#NULL!	1	#NULL!	1	1	5	5	4	1	3	2	2	2	3	4	7	7	1	0	0	0	1	0	0	0	0	0	1	1	1	0	0	0	0	0	0	3	0	0	#NULL!	#NULL!	#NULL!	1	1
2	27	1	#NULL!	#NULL!	4	#NULL!	1	#NULL!	1	1	1	4	3	1	1	2	2	2	3	3	1	1	1	0	0	0	0	0	0	0	0	0	0	0	0	0	0	0	0	0	0	0	0	0	#NULL!	#NULL!	#NULL!	1	1
2	29	2	2	13	4	#NULL!	1	#NULL!	2	1	7	4	2	3	1	2	2	2	1	3	6	1	1	0	0	0	0	0	1	0	1	0	0	0	0	0	0	0	0	0	0	0	0	0	#NULL!	2	#NULL!	1	1
2	39	1	#NULL!	#NULL!	1	3	2	2	3	1	4	6	4	1	1	2	2	2	2	3	7	7	1	0	0	0	0	0	0	0	0	0	0	0	0	0	0	0	0	0	0	0	0	0	3	#NULL!	#NULL!	1	2
2	37	2	1	5	1	3	2	2	3	1	1	4	3	1	1	2	2	2	2	3	1	1	1	0	0	0	0	0	0	0	0	0	0	0	0	0	0	0	0	0	0	0	0	0	3	1	#NULL!	1	2
2	33	2	2	18	1	3	2	2	3	1	1	3	3	3	2	2	2	2	2	5	7	7	1	0	0	0	0	0	0	0	0	0	0	0	0	1	0	0	0	2	0	0	0	0	3	2	#NULL!	1	2
1	44	2	4	38	1	4	2	3	2	2	6	2	2	4	1	2	2	2	2	5	1	1	1	1	1	1	2	1	2	1	1	1	1	1	1	2	1	1	1	1	1	1	2	1	4	4	#NULL!	2	2
2	28	1	#NULL!	#NULL!	4	#NULL!	1	#NULL!	1	2	3	5	1	4	3	2	2	2	3	3	4	1	1	0	3	0	0	0	0	0	0	0	1	0	0	0	0	0	0	1	0	0	0	0	#NULL!	#NULL!	#NULL!	1	1
2	26	1	#NULL!	#NULL!	4	#NULL!	1	#NULL!	1	1	8	6	3	4	2	2	2	2	3	1	7	1	1	0	0	0	0	0	0	0	0	0	0	0	0	0	0	0	0	0	0	0	0	0	#NULL!	#NULL!	#NULL!	1	1
2	34	2	2	17	1	3	2	2	2	1	1	3	2	3	2	2	2	2	6	5	7	3	1	0	0	0	0	0	0	0	0	0	1	0	1	2	2	2	0	0	0	0	2	1	3	2	#NULL!	1	2
2	43	2	4	30	1	4	2	3	1	1	1	4	2	3	2	2	2	2	2	5	1	1	1	0	1	2	1	2	2	1	2	1	0	0	0	1	0	1	0	0	1	1	2	2	4	4	#NULL!	2	2
2	35	2	3	25	1	4	2	3	2	1	5	3	1	2	2	2	2	2	2	5	1	1	1	0	0	1	0	0	1	0	0	0	0	1	0	0	0	0	0	0	1	0	0	1	4	3	#NULL!	1	2
2	25	2	1	4	2	#NULL!	1	#NULL!	3	2	2	6	3	3	1	2	2	2	1	5	7	7	1	1	0	0	0	1	0	0	0	0	0	0	0	0	0	0	0	0	0	0	0	0	#NULL!	1	#NULL!	1	1
1	30	1	#NULL!	#NULL!	1	2	2	1	2	1	4	6	4	1	2	2	2	2	2	3	7	7	1	0	1	1	1	1	1	2	1	1	1	0	1	0	0	0	1	0	0	1	0	0	2	#NULL!	#NULL!	1	2
2	56	2	5	40	1	3	2	2	1	1	1	3	2	4	1	2	2	2	2	5	5	7	1	1	1	0	1	1	1	0	1	0	0	1	0	1	0	2	0	1	1	1	1	2	3	5	#NULL!	1	3
2	21	2	1	2	3	#NULL!	1	#NULL!	3	2	2	6	3	3	1	2	2	2	1	1	4	3	1	2	1	1	2	2	2	1	1	2	2	2	1	2	2	2	1	2	2	1	1	1	#NULL!	1	#NULL!	2	1
1	46	2	4	30	6	4	2	3	1	1	7	4	2	1	2	2	2	2	6	5	1	1	1	3	3	2	2	2	2	2	2	2	2	2	2	3	2	2	2	0	1	0	2	3	4	4	#NULL!	2	2
2	34	1	#NULL!	#NULL!	1	#NULL!	1	#NULL!	1	1	1	2	3	1	2	2	2	2	2	4	3	2	1	0	0	0	1	0	0	1	0	0	0	0	0	0	0	1	0	0	0	0	0	0	#NULL!	#NULL!	#NULL!	1	2
1	50	1	#NULL!	#NULL!	1	3	2	2	2	2	6	5	3	1	3	2	2	2	2	1	1	1	1	0	0	0	0	0	0	0	0	0	1	3	0	0	0	0	0	0	0	0	0	2	3	#NULL!	#NULL!	1	3
1	23	1	#NULL!	#NULL!	5	#NULL!	1	#NULL!	2	2	2	6	4	1	1	2	2	2	3	1	7	1	1	2	0	0	0	1	0	0	0	0	2	1	0	0	0	0	1	0	2	1	0	0	#NULL!	#NULL!	#NULL!	1	1
2	30	1	#NULL!	#NULL!	4	#NULL!	1	#NULL!	2	1	7	6	3	4	3	2	2	2	3	3	7	7	1	0	1	1	2	1	0	1	1	0	0	1	1	1	1	2	0	1	0	0	0	0	#NULL!	#NULL!	#NULL!	1	2
1	44	4	2	19	1	3	2	2	1	2	6	3	2	4	3	2	2	2	2	2	2	7	1	0	0	0	0	0	0	0	1	0	3	0	0	0	0	0	1	1	0	0	0	2	3	2	#NULL!	1	2
2	49	1	#NULL!	#NULL!	1	3	2	2	2	1	4	5	4	1	1	2	2	2	2	1	7	7	1	0	1	0	0	0	0	0	0	0	0	0	0	0	0	1	0	1	0	3	0	0	3	#NULL!	#NULL!	1	2
2	38	1	#NULL!	#NULL!	1	3	2	2	1	1	5	4	2	1	1	2	2	2	2	5	7	7	1	0	0	0	0	0	0	0	0	0	0	0	0	0	0	0	0	0	0	0	0	0	3	#NULL!	#NULL!	1	2
2	68	1	#NULL!	#NULL!	1	3	2	2	2	2	6	4	2	4	3	1	2	2	2	1	2	7	1	1	0	0	0	0	0	0	1	0	3	0	0	0	1	1	1	1	0	0	1	3	3	#NULL!	#NULL!	1	3
1	58	1	#NULL!	#NULL!	1	3	2	2	2	2	3	5	3	4	3	2	2	2	2	1	1	2	1	0	0	0	0	0	1	0	0	0	2	1	0	1	0	0	1	1	0	0	0	3	3	#NULL!	#NULL!	1	3
2	37	1	#NULL!	#NULL!	1	4	2	3	1	1	1	4	2	3	3	2	2	1	2	3	7	7	1	0	0	3	3	1	2	2	2	1	3	0	1	1	2	2	3	3	2	1	3	3	4	#NULL!	#NULL!	2	2
2	40	1	#NULL!	#NULL!	5	3	2	2	1	1	7	6	4	1	2	2	1	1	1	1	7	7	1	0	0	1	1	1	3	2	2	0	0	0	1	1	0	0	1	1	0	0	2	0	3	#NULL!	#NULL!	1	2
1	63	1	#NULL!	#NULL!	6	3	2	2	2	2	6	4	2	2	2	1	2	2	1	2	1	4	1	0	0	0	1	1	0	0	1	0	1	3	0	1	1	1	0	1	0	0	0	2	3	#NULL!	#NULL!	1	3
2	29	2	3	26	3	#NULL!	1	#NULL!	3	1	1	5	2	1	1	2	2	2	2	3	1	2	1	1	3	0	2	1	0	1	0	0	1	0	0	0	0	0	1	0	2	1	0	2	#NULL!	3	#NULL!	1	1
[truncated: 15 more columns]
